# Supplementary material
Source: PubMed Central journal article supplement (PMC4194312)
Supplement: NIHMS60627-supplement-Supplementary_Information.pdf [file NIHMS60627-supplement-Supplementary_Information.pdf]

# CREBBP HAT domain mutations prevail in relapse cases of high hyperdiploid childhood acute lymphoblastic leukemia

Supplementary Information for: Inthal A. et al.

## Materials and Methods

**Table S1. Primer combinations for mutational screening of *CREBBP***

| Primer          | Sequence                    | Primer           | Sequence               |
|-----------------|-----------------------------|------------------|------------------------|
| CREBBPex1-fw1   | ggcggcaccatgttctc           | CREBBPex18-fw1   | gttggaatggaagtattttgg  |
| CREBBPex1-rev1  | tcggtatccgcgaccac           | CREBBPex18-rev1  | caccagacagcagattgcac   |
| CREBBPex2-fw1   | tgctagtgttcgtgctgaatg       | CREBBPex19-rev1  | cacccggcctgaaattg      |
| CREBBPex2-fw2   | aaagcaagtgggctgg            | CREBBPex18-fw2   | cccttggatattgctgtggac  |
| CREBBPex2-rev1  | gagtggcacgtggagagc          | CREBBPex19-rev3  | ggttctctatgicgccaagg   |
| CREBBPex3-fw1   | attcccaggcccttc             | CREBBPex20-fw1   | ctgctctgattggtgcttc    |
| CREBBPex3-rev1  | atctgggttctctcctatcacc      | CREBBPex20-rev1  | gcaaggaagtcaaaatggcac  |
| CREBBPex4-fw1   | atcagctttgctttgtttgag       | CREBBPex21-fw1   | ttgagatttaaggggccatc   |
| CREBBPex4-rev1  | ccggagcctatgaaccag          | CREBBPex21-rev1  | cccacaaccactccataag    |
| CREBBPex5-fw1   | taccatttctatggaatctggc      | CREBBPex22-fw1   | accagagaacaaggtgtgg    |
| CREBBPex5-rev1  | tcataaccctgcccactc          | CREBBPex23-rev1  | gagaggaaccaagaacaatgg  |
| CREBBPex6-fw1   | ttgtcctcactactgctaggc       | CREBBPex24-fw1   | ttccgtgttgagAACattag   |
| CREBBPex6-rev1  | ctgaaaactgccttgggttc        | CREBBPex24-rev1  | cgctgctgcaaagtcttg     |
| CREBBPex7-fw1   | tggtggcatgttggtatctg        | CREBBPex25-fw1   | catgcctccgctcatctg     |
| CREBBPex8-rev1  | gacatagagtgtgggaatctctgg    | CREBBPex25-rev1  | tttaatccccatgaaggctcac |
| CREBBPex9-fw1   | ctggacgaaaccccatgctc        | CREBBPex26-fw1   | ttgacgctgaatgacagag    |
| CREBBPex9-rev1  | aggagtctgtcccaactacatagattc | CREBBPex26-rev1  | tggaagaggagcctttggag   |
| CREBBPex10-fw1  | aagaatgtggccttctggtg        | CREBBPex27-fw2   | ttactctgtcctggcttagtcc |
| CREBBPex11-fw1  | ctggcattggaacacacg          | CREBBPex27-rev1  | gCGaatgcaagaaaaggc     |
| CREBBPex11-rev1 | atcagcaaaaaggaatgaaag       | CREBBPex28-fw1   | catgggactctgccacacc    |
| CREBBPex12-fw1  | tcaccacccacattg             | CREBBPex28-rev2  | acggagacaccaccagg      |
| CREBBPex12-rev1 | gaaccacaggattctcaagtgc      | CREBBPex29-fw1   | tgacactttggcctgagc     |
| CREBBPex13-fw1  | aggaaggcaggatgtgag          | CREBBPex29-rev1  | cttccctcccaccacagac    |
| CREBBPex13-rev1 | ggactacaggacaaagggtggag     | CREBBPex30-fw1   | agccacctgcctattctgc    |
| CREBBPex14-fw1  | atcacatttcaaacgggg          | CREBBPex30-rev1  | agtCagtgcagccaccatc    |
| CREBBPex14-rev1 | aaccaccgCgctg               | CREBBPex31a-fw1  | cccagactagcgggtggag    |
| CREBBPex15-fw1  | cctctggctgctgttacctc        | CREBBPex31a-rev1 | agcgtgggtgagatgc       |
| CREBBPex15-rev1 | aaccCCgaaccacattc           | CREBBPex31b-fw1  | cagcagccatgCag         |
| CREBBPex16-fw1  | ggaagagaagaggaatcataaatgc   | CREBBPex31b-rev1 | cctggtactaagggacgtgg   |
| CREBBPex16-rev1 | aatctccacatggaatcctaac      | CREBBPex31c-fw1  | atgaagcagcagattgggtc   |
| CREBBPex17-fw1  | taacggtgatggacgagagc        | CREBBPex31c-rev1 | ttaaacaatccacccttc     |
| CREBBPex17-rev1 | atgtgcttccctgctcag          |                  |                        |

### Validation of *CREBBP* copy number aberrations by MLPA

Multiplex ligation dependent probe amplification (MLPA) was used to verify genomic alterations of *CREBBP* with SALSA MLPA kit P313-A1 *CREBBP* (MRC Holland, Amsterdam, The Netherlands). Fragment analysis was performed by VBC Biotech Service GmbH (Vienna, Austria) and data analysis was done with Coffalyzer V9.4 (MRC Holland, Amsterdam, The Netherlands).

## Results

**Table S2. Genomic Imbalances / UPIDs by SNP array of 16 HD ALL relapse cases**

| Pt # | copy number SNParray                                                                                         | UPID                                  |
|------|--------------------------------------------------------------------------------------------------------------|---------------------------------------|
| 1D   | 53; +4,+5q,+6pqqpart,+8,+10,+14,-17p,+17q,+18,+2x21,+ X                                                      | 6qqpart, 7, 9; X                      |
| 1R   | 54; +4,+2x5qpart,+6pqqpart,-6qqpart,+8,+10,+14,-17p,+17q,+18,+2x21,+ X                                       | 6qqpart, 7, 9; X                      |
| 2D   | 54; +4,+6,+8,+14,+17,+18,+21,+X                                                                              | 9p                                    |
| 2R   | 50; +6,+8ppartq,+14,+17q,+21,+X                                                                              | 9p, 18                                |
| 3D   | 50; 9qqpart,+14,+17qqpart,+18p,+18qqpart,+2x21,+ X                                                           | 18qqpart; X                           |
| 3R   | 50;-1qqpart,9qqpart,+14,+17qqpart,+18ppart,+18qqpart,+2x21,+ X                                               | 18qqpart; X                           |
| 4D   | 55; +4,+6,+14,+17,+18,2x+21,+22, X                                                                           | X                                     |
| 4R   | 53; +1qqpart,+2qqpart,+4,+6ppartq,+14qqpart,+17,+18,+2x21,+22,+ X                                            | 14qqpart ; X                          |
| 5D   | 54; +6,+9,+10,+2x14,+18,+ 2x21,+X                                                                            | no UPID                               |
| 5R   | 52; +1qqpart,+6,+9,+10,+14,+18,+21,+X                                                                        | no UPID                               |
| 6D   | 55; +4,+6ppart,+8,+9,+14,+17,+18,+2x21,+X                                                                    | no UPID                               |
| 6R   | 54; +4,+6ppart,+8,-9p,+9q,+14,+17,+18,+2x21,+X                                                               | no UPID                               |
| 7D   | 52; +4,+8,+10,+14,-20,+2x21,+X                                                                               | no UPID                               |
| 7R   | 53; +8,-9p,+9q,+10,+14,+16,+2x21,+X                                                                          | 16p (UPIT); 20                        |
| 8D   | 57; +1qqpart,+4,+6,-7p,+7q,+10,+11pppart,+2x14,+18,+2x21,+2xX                                                | 1, 1qqpart (UPIT)                     |
| 8R   | 57; +1qqpart,+4,+5qqpart,+6,-7p,+7q,+10,+11pppart,+2x14,+18,+2x21,+2xX                                       | 1, 1qqpart (UPIT)                     |
| 9D   | 59; +1q,+4,+5p+qpart,+6,+8,+2x10,+11,+12,+14,+17qqpart,+2x18,+2x21,+ X                                       | 5q; X                                 |
| 9R   | 60,+2x1qqpart,+1qqpart,+4,+2x5pppart,+6,+7p+qpart,+8,+2x10,+11,+12pppartq,+14,+16,+2x17qqpart,+2x18,+2x21,+X | 5q; X                                 |
| 10D  | 55; +6,+10,+2x14,+2x18,+2x21,+ X                                                                             | X                                     |
| 10R  | 55; +6,+10,+2x14,+2x18,+2x21,+ X                                                                             | X                                     |
| 11D  | 52; +4,+6,+10,+14,-17p,+17q,+18,-20qqpart,+2x21,+X                                                           | X                                     |
| 11R  | 51; +4,+6,+8,-9p,+10,+14qqpart,-17ppart,+17q,-20qqpart,+2x21,+X                                              | X, 17ppart, 18                        |
| 12D  | 58; +1qqpart,+4,+6,+8,+2x10,+11,-12pppart,+2x14,+17part,+18,+2x21,+X                                         | X                                     |
| 12R  | 58; +1qqpart,+4,+6,+8,+9,+2x10,+11,+2x14,+17part,+18p+qpart,+2x21,+X                                         | 18qqpart; X                           |
| 13D  | 54; +1qqpart,+4,+6,+9,+10,+17qqpart,+18,+2x21,+ X                                                            | X                                     |
| 13R  | 53;+ 2x 1qqpart,+4,+6,+10,+17qqpart,+18,+2x21,+ X                                                            | X                                     |
| 14D  | 55; +6,+8,+10,+14,+17,+18,+ 2x21,+X                                                                          | 2, 8qqpart, 19; X                     |
| 14R  | 51; +6pqqpart,+8,-9ppart,+9qqpart,+10pppartq,+14,+17pppartq,+18qqpart,+2x21,+X                               | 2, 8qqpart, 10pppart, 18pppart, 19; X |
| 15D  | 53; +4,+8,+14,+17,+18,+21,+X                                                                                 | 8qqpart, X                            |
| 15R  | 54; +4,+8,-9ppart,+14,+17,+18,+2x21,+X                                                                       | 8qqpart, 16p; X                       |
| 16D  | 56; +4,+6,+8,+9,+10,+14,+17,+18,+2x21,+X                                                                     | 3, 15; X                              |
| 16R  | 56; +4,+6,-7p,+7q,+8,+9,+10,+14,+17,+18,+2x21,+X                                                             | 3, 15; X                              |

Gains and losses of whole and segments of chromosomes that differ between matched diagnosis and relapse samples are shown in bold; part, partial.

**Table S3. List of all regions of CNAs in 16 HD diagnosis and relapse samples**

| Pt | chr | start     | end       | length    | mean | CN        | first 20 genes (alphabetical order)                                                                                                                                       |
|----|-----|-----------|-----------|-----------|------|-----------|---------------------------------------------------------------------------------------------------------------------------------------------------------------------------|
| 1D | 4   | 2281      | 191261905 | 191259624 | 2,92 | Trisomy   | AADAT/ AASDH/ ABCA11P/ ABCE1/ ABCG2/ ABLIM2/ ACCN5/ ACOX3/ ACSL1/ ADAD1/ ADAM29/ ADAMTS3/ ADD1/ ADH1A/ ADH1B/ ADH1C/ ADH4/ ADH5/ ADH6/ ADH7                               |
| 1D | 5   | 56553681  | 180722927 | 124169246 | 2,84 | Trisomy   | AACSL/ ABLIM3/ ACOT12/ ACSL6/ ACTBL2/ ADAM19/ ADAMTS19/ ADAMTS2/ ADAMTS6/ ADRA1B/ ADRB2/ AFAP1L1/ AFF4/ AGGF1/ AGXT2L2/ ALDH7A1/ ANKHD1/ ANKHD1-EIF4EBP3/ ANKRA2/ ANKRD31 |
| 1D | 6   | 94661     | 26302046  | 26207385  | 3,18 | Trisomy   | ACOT13/ ALDH5A1/ ATXN1/ BMP6/ BPHL/ C6orf105/ C6orf114/ C6orf145/ C6orf146/ C6orf195/ C6orf201/ C6orf218/ C6orf52/ C6orf62/ CAGE1/ CAP2/ CCDC90A/ CD83/ CDKAL1/ CDYL      |
| 1D | 6   | 26357012  | 32580432  | 6223420   | 2,88 | Trisomy   | ABCF1/ ABT1/ AGER/ AGPAT1/ AIF1/ APOM/ ATF6B/ ATP6V1G2/ BAT1/ BAT2/ BAT3/ BAT4/ BAT5/ BTN1A1/ BTN2A1/ BTN2A2/ BTN2A3/ BTN3A1/ BTN3A2/ BTN3A3                              |
| 1D | 6   | 32647506  | 93517380  | 60869874  | 2,88 | Trisomy   | AARS2/ ABCC10/ AKIRIN2/ ANKRD6/ ANKS1A/ APOBEC2/ B3GALT4/ B3GAT2/ BACH2/ BAG2/ BAI3/ BAK1/ BCKDHB/ BEND6/ BMP5/ BRD2/ BRPF3/ BTBD9/ BYSL/ C6orf1                          |
| 1D | 7   | 145857297 | 145885517 | 28220     | 1,36 | Deletion  | intron of CNTNAP2                                                                                                                                                         |
| 1D | 8   | 21254     | 146268960 | 146247706 | 2,62 | Trisomy   | ABRA/ ADAM18/ ADAM2/ ADAM28/ ADAM32/ ADAM3A/ ADAM5P/ ADAM7/ ADAM9/ ADAMDEC1/ ADCK5/ ADCY8/ ADHFE1/ ADRA1A/ ADRB3/ AGPAT5/ AGPAT6/ AMAC1L2/ ANGPT1/ ANGPT2                 |
| 1D | 9   | 23351462  | 23369103  | 17641     | 0,77 | Deletion  | region ends 311002 bp before ELAVL2                                                                                                                                       |
| 1D | 10  | 62759     | 67751120  | 67688361  | 2,88 | Trisomy   | A1CF/ ABI1/ ACBD5/ ACBD7/ ADARB2/ ADO/ AGAP4/ AGAP6/ AGAP7/ AGAP8/ AKR1C1/ AKR1C2/ AKR1C3/ AKR1C4/ AKR1CL1/ AKR1E2/ ALOX5/ ANK3/ ANKRD16/ ANKRD26                         |
| 1D | 10  | 67769650  | 135356695 | 67587045  | 2,87 | Trisomy   | ABCC2/ ABLIM1/ ACADSB/ ACSL5/ ACTA2/ ACTR1A/ ADAM12/ ADAM8/ ADAMTS14/ ADD3/ ADK/ ADRA2A/ ADRB1/ AFAP1L2/ AGAP11/ AGAP5/ AIFM2/ ALDH18A1/ ANKRD1/ ANKRD2                   |
| 1D | 14  | 18072124  | 21961276  | 3889152   | 2,89 | Trisomy   | ANG/ APEX1/ C14orf176/ CCNB1IP1/ CHD8/ FAM12A/ FAM12B/ FLJ10357/ HNRNPC/ KLHL33/ METT11D1/ METTL3/ MIR1201/ NDRG2/ OR10G2/ OR10G3/ OR11G2/ OR11H12/ OR11H4/ OR11H6        |
| 1D | 14  | 21989775  | 105306458 | 83316683  | 2,89 | Trisomy   | ABCD4/ ABHD12B/ ABHD4/ ACIN1/ ACOT1/ ACOT2/ ACOT4/ ACOT6/ ACTN1/ ACTR10/ ACYP1/ ADAM20/ ADAM21/ ADAM21P/ ADCK1/ ADCY4/ ADSSL1/ AHNAK2/ AHSA1/ AK7                         |
| 1D | 17  | 526       | 21456827  | 21456301  | 1,15 | Deletion  | ABR/ ACADVL/ ACAP1/ ADORA2B/ AIPL1/ AKAP10/ ALDH3A1/ ALDH3A2/ ALKBH5/ ALOX12/ ALOX12B/ ALOX12P2/ ALOX15/ ALOX15B/ ALOXE3/ AMAC1L3/ ANKFY1/ ARHGEF15/ ARRB2/ ASGR1         |
| 1D | 17  | 21456827  | 78643089  | 57186262  | 2,86 | Trisomy   | AANAT/ AARSD1/ AATF/ AATK/ ABCA10/ ABCA5/ ABCA6/ ABCA8/ ABCA9/ ABCC3/ ABHD15/ ABI3/ ACACA/ ACBD4/ ACCN1/ ACE/ ACLY/ ACOX1/ ACSF2/ ACTG1                                   |
| 1D | 18  | 1543      | 76116030  | 76114487  | 2,91 | Trisomy   | ABHD3/ ACAA2/ ADCYAP1/ ADNP2/ AFG3L2/ ALPK2/ ANKRD12/ ANKRD29/ ANKRD30B/ APCDD1/ AQP4/ ARHGAP28/ ASXL3/ ATP5A1/ ATP8B1/ ATP9B/ B4GALT6/ BCL2/ BRUNOL4/ C18orf1            |
| 1D | 21  | 9758742   | 13329446  | 3570704   | 2,80 | Trisomy   | BAGE/ BAGE2/ BAGE3/ BAGE4/ BAGE5/ TPTE                                                                                                                                    |
| 1D | 21  | 13329446  | 46921386  | 33591940  | 3,77 | Tetrasomy | ABCC13/ ABCG1/ ADAMTS1/ ADAMTS5/ ADARB1/ AGPAT3/ AIRE/ APP/ ATP5J/ ATP5O/ B3GALT5/ BACE2/ BACH1/ BRWD1/ BTG3/ C21orf119/ C21orf121/ C21orf122/ C21orf125/ C21orf128       |
| 1R | 4   | 2281      | 191261905 | 191259624 | 2,68 | Trisomy   | AADAT/ AASDH/ ABCA11P/ ABCE1/ ABCG2/ ABLIM2/ ACCN5/ ACOX3/ ACSL1/ ADAD1/ ADAM29/ ADAMTS3/ ADD1/ ADH1A/ ADH1B/ ADH1C/ ADH4/ ADH5/ ADH6/ ADH7                               |

|    |    |           |           |           |      |           |                                                                                                                                                                     |
|----|----|-----------|-----------|-----------|------|-----------|---------------------------------------------------------------------------------------------------------------------------------------------------------------------|
| 1R | 5  | 56292277  | 126168319 | 69876042  | 3,27 | Tetrasomy | ACOT12/ ACTBL2/ ADAMTS6/ AGGF1/ ALDH7A1/ ANKRA2/ ANKRD31/ ANKRD32/ ANKRD34B/ AP3B1/ AP3S1/ APC/ ARRDC3/ ARSB/ ARSK/ ATG10/ ATG12/ ATP6AP1L/ BDP1/ BHMT              |
| 1R | 6  | 94661     | 93404262  | 93309601  | 2,66 | Trisomy   | AARS2/ ABCC10/ ABCF1/ ABT1/ ACOT13/ AGER/ AGPAT1/ AIF1/ AKIRIN2/ ALDH5A1/ ANKRD6/ ANKS1A/ APOBEC2/ APOM/ ATF6B/ ATP6V1G2/ ATXN1/ B3GALT4/ B3GAT2/ BACH2             |
| 1R | 6  | 93404262  | 103843095 | 10438833  | 1,56 | Deletion  | ASCC3/ C6orf167/ C6orf168/ CCNC/ COQ3/ EPHA7/ FBXL4/ FHL5/ FUT9/ GPR63/ GRIK2/ KIAA0776/ KLHL32/ MANEA/ MCHR2/ MIR2113/ NDUFAF4/ POU3F2/ PRDM13/ SFRS18             |
| 1R | 6  | 103843095 | 103863692 | 20597     | 3,68 | Tetrasomy | region starts 1218444 bp after GRIK2                                                                                                                                |
| 1R | 6  | 103863693 | 118972547 | 15108854  | 1,27 | Deletion  | AIM1/ AKD1/ AMD1/ ARMC2/ ATG5/ BEND3/ BET3L/ BRD7P3/ BVES/ C6orf182/ C6orf186/ C6orf203/ C6orf225/ CCDC162/ CD164/ CDC40/ CDK19/ COL10A1/ DCBLD1/ DDO               |
| 1R | 7  | 145857297 | 145885517 | 28220     | 1,36 | Deletion  | intron of CNTNAP2                                                                                                                                                   |
| 1R | 8  | 21254     | 146268960 | 146247706 | 2,73 | Trisomy   | ABRA/ ADAM18/ ADAM2/ ADAM28/ ADAM32/ ADAM3A/ ADAM5P/ ADAM7/ ADAM9/ ADAMDEC1/ ADCK5/ ADCY8/ ADHFE1/ ADRA1A/ ADRB3/ AGPAT5/ AGPAT6/ AMAC1L2/ ANGPT1/ ANGPT2           |
| 1R | 9  | 23349559  | 23362204  | 12645     | 0,68 | Deletion  | region ends 317901 bp before ELAVL2                                                                                                                                 |
| 1R | 10 | 62759     | 135356695 | 135293936 | 2,53 | Trisomy   | A1CF/ ABCC2/ ABI1/ ABLIM1/ ACADSB/ ACBD5/ ACBD7/ ACSL5/ ACTA2/ ACTR1A/ ADAM12/ ADAM8/ ADAMTS14/ ADARB2/ ADD3/ ADK/ ADO/ ADRA2A/ ADRB1/ AFAP1L2                      |
| 1R | 14 | 18072124  | 21963443  | 3891319   | 2,81 | Trisomy   | ANG/ APEX1/ C14orf176/ CCNB1IP1/ CHD8/ FAM12A/ FAM12B/ FLJ10357/ HNRNPC/ KLHL33/ METT11D1/ METTL3/ MIR1201/ NDRG2/ OR10G2/ OR10G3/ OR11G2/ OR11H12/ OR11H4/ OR11H6  |
| 1R | 14 | 21989775  | 105400258 | 83410483  | 2,83 | Trisomy   | ABCD4/ ABHD12B/ ABHD4/ ACIN1/ ACOT1/ ACOT2/ ACOT4/ ACOT6/ ACTN1/ ACTR10/ ACYP1/ ADAM20/ ADAM21/ ADAM21P/ ADCK1/ ADCY4/ ADSSL1/ AHNK2/ AHS1/ AK7                     |
| 1R | 17 | 526       | 21466202  | 21465676  | 1,21 | Deletion  | ABR/ ACADVL/ ACAP1/ ADORA2B/ AIPL1/ AKAP10/ ALDH3A1/ ALDH3A2/ ALKBH5/ ALOX12/ ALOX12B/ ALOX12P2/ ALOX15/ ALOX15B/ ALOXE3/ AMAC1L3/ ANKFY1/ ARHGEF15/ ARRB2/ ASGR1   |
| 1R | 17 | 21466202  | 78643089  | 57176887  | 2,78 | Trisomy   | AANAT/ AARSD1/ AATF/ AATK/ ABCA10/ ABCA5/ ABCA6/ ABCA8/ ABCA9/ ABCC3/ ABHD15/ ABI3/ ACACA/ ACBD4/ ACCN1/ ACE/ ACLY/ ACOX1/ ACSF2/ ACTG1                             |
| 1R | 18 | 1543      | 76116030  | 76114487  | 2,77 | Trisomy   | ABHD3/ ACAA2/ ADCYAP1/ ADNP2/ AFG3L2/ ALPK2/ ANKRD12/ ANKRD29/ ANKRD30B/ APCDD1/ AQP4/ ARHGAP28/ ASXL3/ ATP5A1/ ATP8B1/ ATP9B/ B4GALT6/ BCL2/ BRUNOL4/ C18orf1      |
| 1R | 21 | 9758742   | 13329446  | 3570704   | 2,80 | Trisomy   | BAGE/ BAGE2/ BAGE3/ BAGE4/ BAGE5/ TPTE                                                                                                                              |
| 1R | 21 | 13329446  | 46921386  | 33591940  | 3,77 | Tetrasomy | ABCC13/ ABCG1/ ADAMTS1/ ADAMTS5/ ADARB1/ AGPAT3/ AIRE/ APP/ ATP5J/ ATP5O/ B3GALT5/ BACE2/ BACH1/ BRWD1/ BTG3/ C21orf119/ C21orf121/ C21orf122/ C21orf125/ C21orf128 |
| 2D | 4  | 2281      | 68918236  | 68915955  | 2,87 | Trisomy   | AASDH/ ABCA11P/ ABLIM2/ ACOX3/ ADD1/ ADRA2C/ AFAP1/ ANAPC4/ APBB2/ ARAP2/ ARL9/ ATP10D/ ATP5I/ ATP8A1/ BEND4/ BOD1L/ BST1/ C1QTNF7/ C4orf10/ C4orf14                |
| 2D | 4  | 68974065  | 191261905 | 122287840 | 2,85 | Trisomy   | AADAT/ ABCE1/ ABCG2/ ACCN5/ ACSL1/ ADAD1/ ADAM29/ ADAMTS3/ ADH1A/ ADH1B/ ADH1C/ ADH4/ ADH5/ ADH6/ ADH7/ AFF1/ AFM/ AFP/ AGA/ AGPAT9                                 |
| 2D | 6  | 94661     | 170892931 | 170798270 | 2,83 | Trisomy   | AARS2/ ABCC10/ ABCF1/ ABT1/ ACAT2/ ACOT13/ ADAT2/ AGER/ AGPAT1/ AGPAT4/ AHI1/ AIF1/ AIG1/ AIM1/ AKAP12/ AKAP7/ AKD1/ AKIRIN2/ ALDH5A1/ ALDH8A1                      |

|    |    |           |           |           |      |            |                                                                                                                                                                    |
|----|----|-----------|-----------|-----------|------|------------|--------------------------------------------------------------------------------------------------------------------------------------------------------------------|
| 2D | 8  | 21254     | 146268960 | 146247706 | 2,82 | Trisomy    | ABRA/ ADAM18/ ADAM2/ ADAM28/ ADAM32/ ADAM3A/ ADAM5P/ ADAM7/ ADAM9/ ADAMDEC1/ ADCK5/ ADCY8/ ADHFE1/ ADRA1A/ ADRB3/ AGPAT5/ AGPAT6/ AMAC1L2/ ANGPT1/ ANGPT2          |
| 2D | 9  | 19410941  | 22277560  | 2866619   | 0,48 | biDeletion | C9orf53/ CDKN2A/ CDKN2B/ CDKN2BAS/ IFNA1/ IFNA10/ IFNA13/ IFNA14/ IFNA16/ IFNA17/ IFNA2/ IFNA21/ IFNA4/ IFNA5/ IFNA6/ IFNA7/ IFNA8/ IFNB1/ IFNE/ IFNW1             |
| 2D | 9  | 23351462  | 23369103  | 17641     | 0,58 | biDeletion | region ends 311002 bp before ELAVL2                                                                                                                                |
| 2D | 9  | 77335725  | 77370040  | 34315     | 3,15 | Trisomy    | region ends 325340 bp before PCSK5                                                                                                                                 |
| 2D | 14 | 18072124  | 21963443  | 3891319   | 2,75 | Trisomy    | ANG/ APEX1/ C14orf176/ CCNB1IP1/ CHD8/ FAM12A/ FAM12B/ FLJ10357/ HNRNPC/ KLHL33/ METT11D1/ METTL3/ MIR1201/ NDRG2/ OR10G2/ OR10G3/ OR11G2/ OR11H12/ OR11H4/ OR11H6 |
| 2D | 14 | 21989775  | 105406818 | 83417043  | 2,85 | Trisomy    | ABCD4/ ABHD12B/ ABHD4/ ACIN1/ ACOT1/ ACOT2/ ACOT4/ ACOT6/ ACTN1/ ACTR10/ ACYP1/ ADAM20/ ADAM21/ ADAM21P/ ADCK1/ ADCY4/ ADSSL1/ AHNAK2/ AHSA1/ AK7                  |
| 2D | 14 | 106086665 | 106356483 | 269818    | 2,86 | Trisomy    | region starts 64090 bp after LOC100133469                                                                                                                          |
| 2D | 17 | 526       | 78643089  | 78642563  | 2,83 | Trisomy    | AANAT/ AARSD1/ AATF/ AATK/ ABCA10/ ABCA5/ ABCA6/ ABCA8/ ABCA9/ ABCC3/ ABHD15/ ABI3/ ABR/ ACACA/ ACADVL/ ACAP1/ ACBD4/ ACCN1/ ACE/ ACLY                             |
| 2D | 18 | 1543      | 76116030  | 76114487  | 2,64 | Trisomy    | ABHD3/ ACAA2/ ADCYAP1/ ADNP2/ AFG3L2/ ALPK2/ ANKRD12/ ANKRD29/ ANKRD30B/ APCDD1/ AQP4/ ARHGAP28/ ASXL3/ ATP5A1/ ATP8B1/ ATP9B/ B4GALT6/ BCL2/ BRUNOL4/ C18orf1     |
| 2D | 21 | 9758742   | 46921386  | 37162644  | 2,86 | Trisomy    | ABCC13/ ABCG1/ ADAMTS1/ ADAMTS5/ ADARB1/ AGPAT3/ AIRE/ APP/ ATP5J/ ATP5O/ B3GALT5/ BACE2/ BACH1/ BAGE/ BAGE2/ BAGE3/ BAGE4/ BAGE5/ BRWD1/ BTG3                     |
| 2D | X  | 108477    | 154887041 | 154778564 | 2,91 | Trisomy    | ABCB7/ ABCD1/ ACE2/ ACOT9/ ACRC/ ACSL4/ ACTRT1/ AFF2/ AGTR2/ AIFM1/ AKAP14/ AKAP4/ ALAS2/ ALG13/ AMELX/ AMMECR1/ AMOT/ ANKRD58/ AP1S2/ APEX2                       |
| 2D | Y  | 2710438   | 57427648  | 54717210  | 2,65 | Trisomy    | AMELY/ BCORL2/ BPY2/ BPY2/ BPY2B/ BPY2B/ BPY2C/ CD24/ CDY1/ CDY1/ CDY1B/ CDY1B/ CDY2A/ CDY2A/ CDY2B/ CDY2B/ CSPG4P1/ CSPG4P1/ CSPG4P2                              |
| 2R | 6  | 94661     | 170892931 | 170798270 | 2,99 | Trisomy    | AARS2/ ABCC10/ ABCF1/ ABT1/ ACAT2/ ACOT13/ ADAT2/ AGER/ AGPAT1/ AGPAT4/ AHI1/ AIF1/ AIG1/ AIM1/ AKAP12/ AKAP7/ AKD1/ AKIRIN2/ ALDH5A1/ ALDH8A1                     |
| 2R | 8  | 12298577  | 39349649  | 27051072  | 3,00 | Trisomy    | ADAM28/ ADAM32/ ADAM7/ ADAM9/ ADAMDEC1/ ADRA1A/ ADRB3/ ASAH1/ ASH2L/ ATP6V1B2/ BAG4/ BIN3/ BMP1/ BNIP3L/ BRF2/ C8orf41/ C8orf48/ C8orf58/ C8orf75/ C8orf79         |
| 2R | 8  | 39349649  | 39506789  | 157140    | 4,21 | Tetrasomy  | ADAM3A/ region overlaps with 19.02% of ADAM5P                                                                                                                      |
| 2R | 8  | 39506789  | 146268960 | 106762171 | 3,00 | Trisomy    | ABRA/ ADAM18/ ADAM2/ ADCK5/ ADCY8/ ADHFE1/ AGPAT6/ ANGPT1/ ANK1/ ANKRD46/ ANXA13/ AP3M2/ ARC/ ARFGEF1/ ARMC1/ ASAP1/ ASAP1IT1/ ASPH/ ATAD2/ ATP6V0D2               |
| 2R | 9  | 19413099  | 22266390  | 2853291   | 0,21 | biDeletion | C9orf53/ CDKN2A/ CDKN2B/ CDKN2BAS/ IFNA1/ IFNA10/ IFNA13/ IFNA14/ IFNA16/ IFNA17/ IFNA2/ IFNA21/ IFNA4/ IFNA5/ IFNA6/ IFNA7/ IFNA8/ IFNB1/ IFNE/ IFNW1             |
| 2R | 9  | 23352460  | 23370082  | 17622     | 0,36 | biDeletion | region ends 310023 bp before ELAVL2                                                                                                                                |
| 2R | 9  | 35251164  | 36965049  | 1713885   | 1,06 | Deletion   | C9orf100/ C9orf128/ CA9/ CCDC107/ CCIN/ CD72/ CLTA/ CREB3/ FAM166B/ GBA2/ GLIPR2/ GNE/ HINT2/ HRCT1/ LOC158376/ LOC158381/ LOC92973/ MELK/ MSMP/ NPR2              |
| 2R | 9  | 77335725  | 77370040  | 34315     | 3,15 | Trisomy    | region ends 325340 bp before PCSK5                                                                                                                                 |
| 2R | 14 | 18072124  | 21963443  | 3891319   | 2,83 | Trisomy    | ANG/ APEX1/ C14orf176/ CCNB1IP1/ CHD8/ FAM12A/ FAM12B/ FLJ10357/ HNRNPC/ KLHL33/ METT11D1/ METTL3/ MIR1201/ NDRG2/ OR10G2/ OR10G3/ OR11G2/ OR11H12/ OR11H4/ OR11H6 |

|    |    |          |           |           |      |            |                                                                                                                                                                                   |
|----|----|----------|-----------|-----------|------|------------|-----------------------------------------------------------------------------------------------------------------------------------------------------------------------------------|
| 2R | 14 | 21989775 | 105413599 | 83423824  | 2,97 | Trisomy    | ABCD4/ ABHD12B/ ABHD4/ ACIN1/ ACOT1/ ACOT2/ ACOT4/ ACOT6/ ACTN1/ ACTR10/ ACYP1/ ADAM20/ ADAM21/ ADAM21P/ ADCK1/ ADCY4/ ADSSL1/ AHNAK2/ AHTSA1/ AK7                                |
| 2R | 17 | 21474462 | 36676609  | 15202147  | 2,85 | Trisomy    | AATF/ ABHD15/ ACACA/ ACCN1/ ADAP2/ ALDOC/ AMAC1/ ANKRD13B/ AP2B1/ ARGFXP2/ ARHGAP23/ ARL5C/ ATAD5/ BLMH/ C17orf102/ C17orf108/ C17orf37/ C17orf42/ C17orf50/ C17orf63             |
| 2R | 17 | 36681642 | 78643089  | 41961447  | 2,85 | Trisomy    | AANAT/ AARSD1/ AATK/ ABCA10/ ABCA5/ ABCA6/ ABCA8/ ABCA9/ ABCC3/ ABI3/ ACBD4/ ACE/ ACLY/ ACOX1/ ACSF2/ ACTG1/ ADAM11/ AFMID/ AKAP1/ AMZ2                                           |
| 2R | 18 | 36514483 | 36520704  | 6221      | 0,40 | biDeletion | region ends 793530 bp before KC6                                                                                                                                                  |
| 2R | 21 | 9758742  | 46921386  | 37162644  | 2,93 | Trisomy    | ABCC13/ ABCG1/ ADAMTS1/ ADAMTS5/ ADARB1/ AGPAT3/ AIRE/ APP/ ATP5J/ ATP5O/ B3GALT5/ BACE2/ BACH1/ BAGE/ BAGE2/ BAGE3/ BAGE4/ BAGE5/ BRWD1/ BTG3                                    |
| 2R | X  | 108477   | 154887041 | 154778564 | 3,03 | Trisomy    | ABCB7/ ABCD1/ ACE2/ ACOT9/ ACRC/ ACSL4/ ACTRT1/ AFF2/ AGTR2/ AIFM1/ AKAP14/ AKAP4/ ALAS2/ ALG13/ AMELX/ AMMECR1/ AMOT/ ANKRD58/ AP1S2/ APEX2                                      |
| 2R | Y  | 2710438  | 57427648  | 54717210  | 2,59 | Trisomy    | AMELY/ BCORL2/ BPY2/ BPY2/ BPY2B/ BPY2B/ BPY2C/ BPY2C/ CD24/ CDY1/ CDY1/ CDY1B/ CDY1B/ CDY2A/ CDY2A/ CDY2B/ CDY2B/ CSPG4P1/ CSPG4P1/ CSPG4P2                                      |
| 3D | 4  | 88166164 | 88242666  | 76502     | 1,02 | Deletion   | contained within AFF1                                                                                                                                                             |
| 3D | 9  | 41994147 | 95152515  | 53158368  | 2,92 | Trisomy    | AGTPBP1/ ALDH1A1/ ANKRD19/ ANKRD20A1/ ANKRD20A2/ ANKRD20A2/ ANKRD20A3/ ANKRD20A3/ ANKRD20A4/ ANXA1/ APBA1/ AQP7P1/ AQP7P2/ AQP7P3/ ASPN/ AUH/ BICD2/ C9orf103/ C9orf129/ C9orf135 |
| 3D | 11 | 11958863 | 11962638  | 3775      | 1,03 | Deletion   | intron of DKK3                                                                                                                                                                    |
| 3D | 12 | 11640530 | 11692474  | 51944     | 0,99 | Deletion   | region ends 1581 bp before ETV6                                                                                                                                                   |
| 3D | 14 | 18072124 | 21959627  | 3887503   | 2,91 | Trisomy    | ANG/ APEX1/ C14orf176/ CCNB1P1/ CHD8/ FAM12A/ FAM12B/ FLJ10357/ HNRNPC/ KLHL33/ METT11D1/ METTL3/ MIR1201/ NDRG2/ OR10G2/ OR10G3/ OR11G2/ OR11H12/ OR11H4/ OR11H6                 |
| 3D | 14 | 22064640 | 105317595 | 83252955  | 2,92 | Trisomy    | ABCD4/ ABHD12B/ ABHD4/ ACIN1/ ACOT1/ ACOT2/ ACOT4/ ACOT6/ ACTN1/ ACTR10/ ACYP1/ ADAM20/ ADAM21/ ADAM21P/ ADCK1/ ADCY4/ ADSSL1/ AHNAK2/ AHTSA1/ AK7                                |
| 3D | 15 | 47204501 | 47283249  | 78748     | 0,99 | Deletion   | COPS2/ region overlaps with 42.59% of GALK2 / region overlaps with 60.93% of GALK2                                                                                                |
| 3D | 17 | 41591252 | 78643089  | 37051837  | 2,92 | Trisomy    | AANAT/ AATK/ ABCA10/ ABCA5/ ABCA6/ ABCA8/ ABCA9/ ABCC3/ ABI3/ ACE/ ACOX1/ ACSF2/ ACTG1/ AFMID/ AKAP1/ AMZ2/ ANAPC11/ ANKFN1/ ANKRD40/ APOH                                        |
| 3D | 18 | 1543     | 19467488  | 19465945  | 2,87 | Trisomy    | ABHD3/ ADCYAP1/ AFG3L2/ ANKRD12/ ANKRD30B/ APCDD1/ ARHGAP28/ C18orf1/ C18orf18/ C18orf19/ C18orf2/ C18orf45/ C18orf56/ C18orf8/ CABLES1/ CEP192/ CEP76/ CETN1/ CHMP1B/ CIDEA      |
| 3D | 18 | 25606292 | 26170001  | 563709    | 3,96 | Tetrasomy  | MIR302F                                                                                                                                                                           |
| 3D | 18 | 27944964 | 30303029  | 2358065   | 2,73 | Trisomy    | ASXL3/ C18orf34/ FAM59A/ KLHL14/ MEP1B/ NOL4/ WBP11P1/ region overlaps with 0.87% of RNF138                                                                                       |
| 3D | 18 | 30303029 | 34355491  | 4052462   | 4,31 | Tetrasomy  | BRUNOL4/ C18orf10/ C18orf21/ DTNA/ ELP2/ FHOD3/ GALNT1/ INO80C/ KIAA1328/ MAPRE2/ MIR187/ MOCOS/ RPRD1A/ SLC39A6/ ZNF24/ ZNF271/ ZNF396/ ZNF397/ ZNF397OS/                        |
| 3D | 18 | 36513571 | 36522759  | 9188      | 0,63 | biDeletion | region ends 791475 bp before KC6                                                                                                                                                  |
| 3D | 18 | 64895705 | 64906491  | 10786     | 0,52 | biDeletion | region starts 22298 bp after CCDC102B                                                                                                                                             |
| 3D | 20 | 10365430 | 10406099  | 40669     | 1,08 | Deletion   | contained within C20orf94                                                                                                                                                         |

|    |    |           |           |          |      |            |                                                                                                                                                                                                                              |
|----|----|-----------|-----------|----------|------|------------|------------------------------------------------------------------------------------------------------------------------------------------------------------------------------------------------------------------------------|
| 3D | 21 | 9758742   | 13352761  | 3594019  | 2,60 | Trisomy    | BAGE/ BAGE2/ BAGE3/ BAGE4/ BAGE5/ TPTE/ region overlaps with 0.57% of C21orf99                                                                                                                                               |
| 3D | 21 | 13352762  | 46921386  | 33568624 | 3,83 | Tetrasomy  | ABCC13/ ABCG1/ ADAMTS1/ ADAMTS5/ ADARB1/ AGPAT3/ AIRE/ APP/ ATP5J/ ATP5O/ B3GALT5/ BACE2/ BACH1/ BRWD1/ BTG3/ C21orf119/ C21orf121/ C21orf122/ C21orf125/ C21orf128                                                          |
| 3R | 1  | 215935855 | 246839546 | 30903691 | 1,33 | Deletion   | ABCB10/ ACBD3/ ACTA1/ ACTN2/ ADSS/ AGT/ AHCTF1/ AIDA/ AKT3/ ARF1/ ARID4B/ ARV1/ AURKAPS1/ B3GALNT2/ BPNT1/ C1orf100/ C1orf101/ C1orf115/ C1orf124/ C1orf131                                                                  |
| 3R | 4  | 88165475  | 88242666  | 77191    | 0,93 | Deletion   | contained within AFF1                                                                                                                                                                                                        |
| 3R | 9  | 41994147  | 95152515  | 53158368 | 2,92 | Trisomy    | AGTPBP1/ ALDH1A1/ ANKRD19/ ANKRD20A1/ ANKRD20A2/ ANKRD20A2/ ANKRD20A3/ ANKRD20A3/ ANKRD20A4/ ANXA1/ APBA1/ AQP7P1/ AQP7P2/ AQP7P3/ ASPN/ AUH/ BICD2/ C9orf103/ C9orf129/ C9orf135                                            |
| 3R | 11 | 11958863  | 11962638  | 3775     | 0,95 | Deletion   | intron of DKK3                                                                                                                                                                                                               |
| 3R | 12 | 11640530  | 11692474  | 51944    | 0,95 | Deletion   | region ends 1581 bp before ETV6                                                                                                                                                                                              |
| 3R | 14 | 18072124  | 21959627  | 3887503  | 2,78 | Trisomy    | ANG/ APEX1/ C14orf176/ CCNB1IP1/ CHD8/ FAM12A/ FAM12B/ FLJ10357/ HNRNPC/ KLHL33/ METT11D1/ METTL3/ MIR1201/ NDRG2/ OR10G2/ OR10G3/ OR11G2/ OR11H12/ OR11H4/ OR11H6                                                           |
| 3R | 14 | 22064640  | 105317595 | 83252955 | 2,75 | Trisomy    | ABCD4/ ABHD12B/ ABHD4/ ACIN1/ ACOT1/ ACOT2/ ACOT4/ ACOT6/ ACTN1/ ACTR10/ ACYP1/ ADAM20/ ADAM21/ ADAM21P/ ADCK1/ ADCY4/ ADSSL1/ AHNK2/ AHSA1/ AK7                                                                             |
| 3R | 15 | 47204501  | 47283249  | 78748    | 0,99 | Deletion   | COPS2/ region overlaps with 42.59% of GALK2 / region overlaps with 60.93% of GALK2                                                                                                                                           |
| 3R | 17 | 41589928  | 78643089  | 37053161 | 2,75 | Trisomy    | AANAT/ AATK/ ABCA10/ ABCA5/ ABCA6/ ABCA8/ ABCA9/ ABCC3/ ABI3/ ACE/ ACOX1/ ACSF2/ ACTG1/ AFMID/ AKAP1/ AMZ2/ ANAPC11/ ANKFN1/ ANKRD40/ APOH                                                                                   |
| 3R | 18 | 1543      | 14148356  | 14146813 | 2,71 | Trisomy    | ADCYAP1/ AFG3L2/ ANKRD12/ APCDD1/ ARHGAP28/ C18orf1/ C18orf18/ C18orf19/ C18orf2/ C18orf56/ CEP192/ CEP76/ CETN1/ CHMP1B/ CIDEA/ CLUL1/ COLEC12/ DLGAP1/ EMILIN2/ ENOSF1                                                     |
| 3R | 18 | 25606292  | 26071289  | 464997   | 3,87 | Tetrasomy  | region ends 61585 bp before MIR302F                                                                                                                                                                                          |
| 3R | 18 | 30653936  | 34355491  | 3701555  | 3,56 | Tetrasomy  | BRUNOL4/ C18orf10/ C18orf21/ ELP2/ FHOD3/ GALNT1/ INO80C/ KIAA1328/ MAPRE2/ MIR187/ MOCOS/ RPRD1A/ SLC39A6/ ZNF24/ ZNF271/ ZNF396/ ZNF397/ ZNF397OS/ region overlaps with 0.25% of DTNA / region overlaps with 1.32% of DTNA |
| 3R | 18 | 36514483  | 36522759  | 8276     | 0,41 | biDeletion | region ends 791475 bp before KC6                                                                                                                                                                                             |
| 3R | 18 | 64895705  | 64906491  | 10786    | 0,41 | biDeletion | region starts 22298 bp after CCDC102B                                                                                                                                                                                        |
| 3R | 20 | 10364029  | 10406099  | 42070    | 1,04 | Deletion   | contained within C20orf94                                                                                                                                                                                                    |
| 3R | 21 | 9758742   | 13352761  | 3594019  | 2,60 | Trisomy    | BAGE/ BAGE2/ BAGE3/ BAGE4/ BAGE5/ TPTE/ region overlaps with 0.57% of C21orf99                                                                                                                                               |
| 3R | 21 | 13352761  | 46921386  | 33568625 | 3,51 | Tetrasomy  | ABCC13/ ABCG1/ ADAMTS1/ ADAMTS5/ ADARB1/ AGPAT3/ AIRE/ APP/ ATP5J/ ATP5O/ B3GALT5/ BACE2/ BACH1/ BRWD1/ BTG3/ C21orf119/ C21orf121/ C21orf122/ C21orf125/ C21orf128                                                          |
| 3R | X  | 1447837   | 1609657   | 161820   | 1,29 | Deletion   | ASMTL/ NCRNA00105/ SLC25A6/ region overlaps with 42.14% of P2RY8 / region overlaps with 8.50% of IL3RA                                                                                                                       |
| 4D | 3  | 3729860   | 4113159   | 383299   | 2,51 | Trisomy    | LRRN1                                                                                                                                                                                                                        |
| 4D | 4  | 2281      | 34446106  | 34443825 | 2,50 | Trisomy    | ABCA11P/ ABLIM2/ ACOX3/ ADD1/ ADRA2C/ AFAP1/ ANAPC4/ ATP5I/ BOD1L/ BST1/ C1QTNF7/ C4orf10/ C4orf23/ C4orf42/ C4orf44/ C4orf48/ C4orf50/ C4orf52/ C4orf6/ CC2D2A                                                              |
| 4D | 4  | 34446107  | 34512963  | 66856    | 3,40 | Tetrasomy  | region ends 1231054 bp before ARAP2                                                                                                                                                                                          |

|    |    |           |           |           |      |           |                                                                                                                                                                      |
|----|----|-----------|-----------|-----------|------|-----------|----------------------------------------------------------------------------------------------------------------------------------------------------------------------|
| 4D | 4  | 34512964  | 70162237  | 35649273  | 2,69 | Trisomy   | AASDH/ APBB2/ ARAP2/ ARL9/ ATP10D/ ATP8A1/ BEND4/ C4orf14/ C4orf19/ C4orf34/ CENPC1/ CEP135/ CHIC2/ CHRNA9/ CLOCK/ CNGA1/ COMMD8/ CORIN/ COX7B2/ CWH43               |
| 4D | 4  | 70263982  | 191261905 | 120997923 | 2,48 | Trisomy   | AADAT/ ABCE1/ ABCG2/ ACCN5/ ACSL1/ ADAD1/ ADAM29/ ADAMTS3/ ADH1A/ ADH1B/ ADH1C/ ADH4/ ADH5/ ADH6/ ADH7/ AFF1/ AFM/ AFP/ AGA/ AGPAT9                                  |
| 4D | 6  | 94661     | 170892931 | 170798270 | 2,48 | Trisomy   | ACOT13/ ALDH5A1/ ATXN1/ BMP6/ BPHL/ C6orf105/ C6orf114/ C6orf145/ C6orf146/ C6orf195/ C6orf201/ C6orf218/ C6orf52/ C6orf62/ CAGE1/ CAP2/ CCDC90A/ CD83/ CDKAL1/ CDYL |
| 4D | 12 | 44455485  | 44696457  | 240972    | 1,07 | Deletion  | SFRS2IP/ region overlaps with 55.03% of ARID2                                                                                                                        |
| 4D | 14 | 18072124  | 105227362 | 87155238  | 2,50 | Trisomy   | ABCD4/ ABHD12B/ ABHD4/ ACIN1/ ACOT1/ ACOT2/ ACOT4/ ACOT6/ ACTN1/ ACTR10/ ACYP1/ ADAM20/ ADAM21/ ADAM21P/ ADCK1/ ADCY4/ ADSSL1/ AHNAK2/ AHS1/ AK7                     |
| 4D | 17 | 526       | 78643089  | 78642563  | 2,51 | Trisomy   | AANAT/ AARSD1/ AATF/ AATK/ ABCA10/ ABCA5/ ABCA6/ ABCA8/ ABCA9/ ABCC3/ ABHD15/ ABI3/ ABR/ ACACA/ ACADVL/ ACAP1/ ACBD4/ ACCN1/ ACE/ ACLY                               |
| 4D | 18 | 1543      | 76116030  | 76114487  | 2,49 | Trisomy   | ABHD3/ ACAA2/ ADCYAP1/ ADNP2/ AFG3L2/ ALPK2/ ANKRD12/ ANKRD29/ ANKRD30B/ APCDD1/ AQP4/ ARHGAP28/ ASXL3/ ATP5A1/ ATP8B1/ ATP9B/ B4GALT6/ BCL2/ BRUNOL4/ C18orf1       |
| 4D | 20 | 1515553   | 1518780   | 3227      | 3,41 | Tetrasomy | intron of SIRPB1                                                                                                                                                     |
| 4D | 21 | 9758742   | 46921386  | 37162644  | 3,22 | Tetrasomy | ABCC13/ ABCG1/ ADAMTS1/ ADAMTS5/ ADARB1/ AGPAT3/ AIRE/ APP/ ATP5J/ ATP5O/ B3GALT5/ BACE2/ BACH1/ BAGE/ BAGE2/ BAGE3/ BAGE4/ BAGE5/ BRWD1/ BTG3                       |
| 4D | 22 | 14432528  | 20712337  | 6279809   | 2,46 | Trisomy   | AIFM3/ ARVCF/ ATP6V1E1/ BCL2L13/ BID/ C22orf25/ C22orf29/ C22orf39/ CCDC116/ CCT8L2/ CDC45L/ CECR1/ CECR2/ CECR4/ CECR5/ CECR6/ CECR7/ CLDN5/ CLTCL1/ COMT           |
| 4D | 22 | 20851465  | 49581322  | 28729857  | 2,49 | Trisomy   | A4GALT/ ACO2/ ACR/ ADM2/ ADORA2A/ ADRBK2/ ADSL/ ALG12/ ANKRD54/ AP1B1/ APOBEC3A/ APOBEC3B/ APOBEC3C/ APOBEC3D/ APOBEC3F/ APOBEC3G/ APOBEC3H/ APOL1/ APOL2/ APOL3     |
| 4R | 1  | 142736042 | 150822089 | 8086047   | 2,42 | Trisomy   | ACP6/ ADAMTSL4/ ANKRD34A/ ANKRD35/ ANP32E/ ANXA9/ APH1A/ ARNT/ BCL9/ BNIPL/ BOLA1/ C1orf152/ C1orf230/ C1orf51/ C1orf54/ C1orf56/ C2CD4D/ CA14/ CD160/ CDC42SE1      |
| 4R | 1  | 150855451 | 210284419 | 59428968  | 2,42 | Trisomy   | ABL2/ ACBD6/ ADAM15/ ADAMTS4/ ADAR/ ADCY10/ ADIPOR1/ ADORA1/ AIM2/ ALDH9A1/ ANGPTL1/ ANKRD36BL1/ ANKRD45/ APC5/ APOA1BP/ APOA2/ APOBEC4/ AQP10/ ARHGAP30/ ARHGEF11   |
| 4R | 2  | 178885386 | 242738130 | 63852744  | 2,42 | Trisomy   | AAMP/ ABCA12/ ABCB6/ ABI2/ ACADL/ ACCN4/ ACSL3/ ADAM23/ AGAP1/ AGFG1/ AGXT/ ALPI/ ALPP/ ALPLL2/ ALS2/ ALS2CR11/ ALS2CR12/ ALS2CR4/ ALS2CR8/ ANKAR                    |
| 4R | 3  | 3730633   | 4162541   | 431908    | 2,38 | Trisomy   | LRRN1                                                                                                                                                                |
| 4R | 4  | 2281      | 34446106  | 34443825  | 2,50 | Trisomy   | ABCA11P/ ABLIM2/ ACOX3/ ADD1/ ADRA2C/ AFAP1/ ANAPC4/ ATP5I/ BOD1L/ BST1/ C1QTNF7/ C4orf10/ C4orf23/ C4orf42/ C4orf44/ C4orf48/ C4orf50/ C4orf52/ C4orf6/ CC2D2A      |
| 4R | 4  | 34446107  | 34512963  | 66856     | 3,40 | Tetrasomy | region ends 1231054 bp before ARAP2                                                                                                                                  |
| 4R | 4  | 34512964  | 70162237  | 35649273  | 2,70 | Trisomy   | AASDH/ APBB2/ ARAP2/ ARL9/ ATP10D/ ATP8A1/ BEND4/ C4orf14/ C4orf19/ C4orf34/ CENPC1/ CEP135/ CHIC2/ CHRNA9/ CLOCK/ CNGA1/ COMMD8/ CORIN/ COX7B2                      |
| 4R | 4  | 70263982  | 191261905 | 120997923 | 2,48 | Trisomy   | AADAT/ ABCE1/ ABCG2/ ACCN5/ ACSL1/ ADAD1/ ADAM29/ ADAMTS3/ ADH1A/ ADH1B/ ADH1C/ ADH4/ ADH5/ ADH6/ ADH7/ AFF1/ AFM/ AFP/ AGA/ AGPAT9                                  |



|    |    |          |           |           |      |           |                                                                                                                                                                    |
|----|----|----------|-----------|-----------|------|-----------|--------------------------------------------------------------------------------------------------------------------------------------------------------------------|
| 4R | 6  | 27775594 | 170892931 | 143117337 | 2,48 | Trisomy   | AARS2/ ABCC10/ ABCF1/ ACAT2/ ADAT2/ AGER/ AGPAT1/ AGPAT4/ AHI1/ AIF1/ AIG1/ AIM1/ AKAP12/ AKAP7/ AKD1/ AKIRIN2/ ALDH8A1/ AMD1/ ANKRD6/ ANKS1A                      |
| 4R | 12 | 44455485 | 44699675  | 244190    | 1,09 | Deletion  | SFRS2IP/ region overlaps with 54.30% of ARID2                                                                                                                      |
| 4R | 13 | 27656094 | 27737994  | 81900     | 2,66 | Trisomy   | contained within PAN3                                                                                                                                              |
| 4R | 14 | 18072124 | 52242914  | 34170790  | 2,45 | Trisomy   | ABHD12B/ ABHD4/ ACIN1/ ADCY4/ AKAP6/ ANG/ AP1G2/ AP4S1/ APEX1/ ARF6/ ARHGAP5/ ATL1/ ATP5S/ BAZ1A/ BCL2L2/ BRMS1L/ C14orf104/ C14orf106/ C14orf119/ C14orf126       |
| 4R | 17 | 526      | 78643089  | 78642563  | 2,42 | Trisomy   | AANAT/ AARSD1/ AATF/ AATK/ ABCA10/ ABCA5/ ABCA6/ ABCA8/ ABCA9/ ABCC3/ ABHD15/ ABI3/ ABR/ ACACA/ ACADVL/ ACAP1/ ACBD4/ ACCN1/ ACE/ ACLY                             |
| 4R | 18 | 1543     | 76116030  | 76114487  | 2,42 | Trisomy   | ABHD3/ ACAA2/ ADCYAP1/ ADNP2/ AFG3L2/ ALPK2/ ANKRD12/ ANKRD29/ ANKRD30B/ APCDD1/ AQP4/ ARHGAP28/ ASXL3/ ATP5A1/ ATP8B1/ ATP9B/ B4GALT6/ BCL2/ BRUNOL4/ C18orf1     |
| 4R | 20 | 1515553  | 1518780   | 3227      | 3,41 | Tetrasomy | intron of SIRPB1                                                                                                                                                   |
| 4R | 21 | 9758742  | 46921386  | 37162644  | 3,15 | Tetrasomy | ABCC13/ ABCG1/ ADAMTS1/ ADAMTS5/ ADARB1/ AGPAT3/ AIRE/ APP/ ATP5J/ ATP5O/ B3GALT5/ BACE2/ BACH1/ BAGE/ BAGE2/ BAGE3/ BAGE4/ BAGE5/ BRWD1/ BTG3                     |
| 4R | 22 | 14432528 | 20712337  | 6279809   | 2,46 | Trisomy   | AIFM3/ ARVCF/ ATP6V1E1/ BCL2L13/ BID/ C22orf25/ C22orf29/ C22orf39/ CCDC116/ CCT8L2/ CDC45L/ CECR1/ CECR2/ CECR4/ CECR5/ CECR6/ CECR7/ CLDN5/ CLTCL1/ COMT         |
| 4R | 22 | 20851465 | 49581322  | 28729857  | 2,47 | Trisomy   | A4GALT/ ACO2/ ACR/ ADM2/ ADORA2A/ ADRBK2/ ADSL/ ALG12/ ANKRD54/ AP1B1/ APOBEC3A/ APOBEC3B/ APOBEC3C/ APOBEC3D/ APOBEC3F/ APOBEC3G/ APOBEC3H/ APOL1/ APOL2/ APOL3   |
| 5D | 6  | 94803    | 170804144 | 170709341 | 2,82 | Trisomy   | AARS2/ ABCC10/ ABCF1/ ABT1/ ACAT2/ ACOT13/ ADAT2/ AGER/ AGPAT1/ AGPAT4/ AHI1/ AIF1/ AIG1/ AIM1/ AKAP12/ AKAP7/ AKD1/ AKIRIN2/ ALDH5A1/ ALDH8A1                     |
| 5D | 9  | 40463    | 140185942 | 140145479 | 2,67 | Trisomy   | ABCA1/ ABCA2/ ABL1/ ABO/ ACER2/ ACO1/ ACTL7A/ ACTL7B/ ADAMTS13/ ADAMTSL1/ ADAMTSL2/ AGPAT2/ AGTPBP1/ AIF1L/ AK1/ AK3/ AKAP2/ AKNA/ ALAD/ ALDH1A1                   |
| 5D | 10 | 67340    | 135355061 | 135287721 | 2,81 | Trisomy   | A1CF/ ABCC2/ ABI1/ ABLIM1/ ACADSB/ ACBD5/ ACBD7/ ACSL5/ ACTA2/ ACTR1A/ ADAM12/ ADAM8/ ADAMTS14/ ADARB2/ ADD3/ ADK/ ADO/ ADRA2A/ ADRB1/ AFAP1L2                     |
| 5D | 14 | 18085723 | 21582175  | 3496452   | 3,53 | Tetrasomy | ANG/ APEX1/ C14orf176/ CCNB1IP1/ CHD8/ FAM12A/ FAM12B/ FLJ10357/ HNRNPC/ KLHL33/ METT11D1/ METTL3/ MIR1201/ NDRG2/ OR10G2/ OR10G3/ OR11G2/ OR11H12/ OR11H4/ OR11H6 |
| 5D | 14 | 21582175 | 21961276  | 379101    | 4,98 | Tetrasomy | region ends 142371 bp before DAD1                                                                                                                                  |
| 5D | 14 | 22012224 | 105406903 | 83394679  | 3,58 | Tetrasomy | ABCD4/ ABHD12B/ ABHD4/ ACIN1/ ACOT1/ ACOT2/ ACOT4/ ACOT6/ ACTN1/ ACTR10/ ACYP1/ ADAM20/ ADAM21/ ADAM21P/ ADCK1/ ADCY4/ ADSSL1/ AHNK2/ AHS1/ AK7                    |
| 5D | 18 | 33309    | 76115555  | 76082246  | 2,81 | Trisomy   | ABHD3/ ACAA2/ ADCYAP1/ ADNP2/ AFG3L2/ ALPK2/ ANKRD12/ ANKRD29/ ANKRD30B/ APCDD1/ AQP4/ ARHGAP28/ ASXL3/ ATP5A1/ ATP8B1/ ATP9B/ B4GALT6/ BCL2/ BRUNOL4/ C18orf1     |
| 5D | 21 | 9758742  | 46942557  | 37183815  | 3,62 | Tetrasomy | ABCC13/ ABCG1/ ADAMTS1/ ADAMTS5/ ADARB1/ AGPAT3/ AIRE/ APP/ ATP5J/ ATP5O/ B3GALT5/ BACE2/ BACH1/ BAGE/ BAGE2/ BAGE3/ BAGE4/ BAGE5/ BRWD1/ BTG3                     |
| 5D | X  | 142664   | 100209242 | 100066578 | 2,79 | Trisomy   | ABCB7/ ACE2/ ACOT9/ ACRC/ AKAP4/ ALAS2/ AMELX/ AP1S2/ APEX2/ APOO/ APOOL/ AR/ ARAF/ ARHGAP6/ ARHGFE9/ ARL13A/ ARR3/ ARSD/ ARSE/ ARSF                               |

|    |    |           |           |           |      |            |                                                                                                                                                                             |
|----|----|-----------|-----------|-----------|------|------------|-----------------------------------------------------------------------------------------------------------------------------------------------------------------------------|
| 5D | X  | 101231888 | 154582820 | 53350932  | 2,82 | Trisomy    | ABCD1/ ACSL4/ ACTRT1/ AFF2/ AGTR2/ AIFM1/ AKAP14/ ALG13/ AMMECR1/ AMOT/ ANKRD58/ APLN/ ARD1A/ ARHGAP4/ ARHGFE6/ ARMCX5/ ASFMR1/ ATG4A/ ATP11C/ ATP1B4                       |
| 5R | 1  | 143660269 | 247188467 | 103528198 | 2,51 | Trisomy    | ABCB10/ ABL2/ ACBD3/ ACBD6/ ACP6/ ACTA1/ ACTN2/ ADAM15/ ADAMTS4/ ADAMTSL4/ ADAR/ ADCY10/ ADIPOR1/ ADORA1/ ADSS/ AGT/ AHCTF1/ AIDA/ AIM2/ AKT3                               |
| 5R | 6  | 94803     | 170804144 | 170709341 | 2,53 | Trisomy    | AARS2/ ABCC10/ ABCF1/ ABT1/ ACAT2/ ACOT13/ ADAT2/ AGER/ AGPAT1/ AGPAT4/ AHI1/ AIF1/ AIG1/ AIM1/ AKAP12/ AKAP7/ AKD1/ AKIRIN2/ ALDH5A1/ ALDH8A1                              |
| 5R | 9  | 40463     | 140185942 | 140145479 | 2,53 | Trisomy    | ABCA1/ ABCA2/ ABL1/ ABO/ ACER2/ ACO1/ ACTL7A/ ACTL7B/ ADAMTS13/ ADAMTSL1/ ADAMTSL2/ AGPAT2/ AGTPBP1/ AIF1L/ AK1/ AK3/ AKAP2/ AKNA/ ALAD/ ALDH1A1                            |
| 5R | 10 | 67340     | 135355061 | 135287721 | 2,56 | Trisomy    | A1CF/ ABCC2/ ABI1/ ABLIM1/ ACADSB/ ACBD5/ ACBD7/ ACSL5/ ACTA2/ ACTR1A/ ADAM12/ ADAM8/ ADAMTS14/ ADARB2/ ADD3/ ADK/ ADO/ ADRA2A/ ADRB1/ AFAP1L2                              |
| 5R | 14 | 18085723  | 21961276  | 3875553   | 2,62 | Trisomy    | ANG/ APEX1/ C14orf176/ CCNB1IP1/ CHD8/ FAM12A/ FAM12B/ FLJ10357/ HNRNPC/ KLHL33/ METT11D1/ METTL3/ MIR1201/ NDRG2/ OR10G2/ OR10G3/ OR11G2/ OR11H12/ OR11H4/ OR11H6          |
| 5R | 14 | 21582175  | 21961276  | 379101    | 4,98 | Tetrasomy  | region ends 142371 bp before DAD1                                                                                                                                           |
| 5R | 14 | 22012224  | 33257545  | 11245321  | 2,62 | Trisomy    | ABHD4/ ACIN1/ ADCY4/ AKAP6/ AP1G2/ AP4S1/ ARHGAP5/ BCL2L2/ C14orf119/ C14orf126/ C14orf128/ C14orf165/ C14orf167/ C14orf21/ C14orf23/ C14orf93/ CBLN3/ CDH24/ CEBPE/ CHMP4A |
| 5R | 14 | 33257545  | 105406903 | 72149358  | 2,57 | Trisomy    | ABCD4/ ABHD12B/ ACOT1/ ACOT2/ ACOT4/ ACOT6/ ACTN1/ ACTR10/ ACYP1/ ADAM20/ ADAM21/ ADAM21P/ ADCK1/ ADSSL1/ AHNK2/ AHS1/ AK7/ AKAP5/ AKT1/ ALDH6A1                            |
| 5R | 18 | 33309     | 76115555  | 76082246  | 2,52 | Trisomy    | ABHD3/ ACAA2/ ADCYAP1/ ADNP2/ AFG3L2/ ALPK2/ ANKRD12/ ANKRD29/ ANKRD30B/ APCDD1/ AQP4/ ARHGAP28/ ASXL3/ ATP5A1/ ATP8B1/ ATP9B/ B4GALT6/ BCL2/ BRUNOL4/ C18orf1              |
| 5R | 20 | 1514456   | 1546711   | 32255     | 3,40 | Tetrasomy  | intron of SIRPB1/ region overlaps with 64.25% of SIRPB1                                                                                                                     |
| 5R | 21 | 9758742   | 46942557  | 37183815  | 3,06 | Trisomy    | ABCC13/ ABCG1/ ADAMTS1/ ADAMTS5/ ADARB1/ AGPAT3/ AIRE/ APP/ ATP5J/ ATP5O/ B3GALT5/ BACE2/ BACH1/ BAGE/ BAGE2/ BAGE3/ BAGE4/ BAGE5/ BRWD1/ BTG3                              |
| 5R | X  | 142664    | 100209242 | 100066578 | 2,48 | Trisomy    | ABCB7/ ACE2/ ACOT9/ ACRC/ AKAP4/ ALAS2/ AMELX/ AP1S2/ APEX2/ APOO/ APOOL/ AR/ ARAF/ ARHGAP6/ ARHGFE9/ ARL13A/ ARR3/ ARSD/ ARSE/ ARSF                                        |
| 5R | X  | 101231888 | 154582820 | 53350932  | 2,41 | Trisomy    | ABCD1/ ACSL4/ ACTRT1/ AFF2/ AGTR2/ AIFM1/ AKAP14/ ALG13/ AMMECR1/ AMOT/ ANKRD58/ APLN/ ARD1A/ ARHGAP4/ ARHGFE6/ ARMCX5/ ASFMR1/ ATG4A/ ATP11C/ ATP1B4                       |
| 6D | 2  | 113879037 | 113930098 | 51061     | 0,49 | biDeletion | region overlaps with 35.96% of CBWD2                                                                                                                                        |
| 6D | 4  | 58866     | 162099905 | 162041039 | 2,89 | Trisomy    | AASDH/ ABCA11P/ ABCE1/ ABCG2/ ABLIM2/ ACCN5/ ACOX3/ ADAD1/ ADAMTS3/ ADD1/ ADH1A/ ADH1B/ ADH1C/ ADH4/ ADH5/ ADH6/ ADH7/ ADRA2C/ AFAP1/ AFF1                                  |
| 6D | 4  | 162104042 | 162249209 | 145167    | 2,91 | Trisomy    | region ends 275290 bp before FSTL5                                                                                                                                          |
| 6D | 4  | 162319797 | 191261905 | 28942108  | 2,83 | Trisomy    | AADAT/ ACSL1/ ADAM29/ AGA/ ANKRD37/ ANP32C/ ANXA10/ ASB5/ C4orf27/ C4orf38/ C4orf39/ C4orf41/ C4orf43/ C4orf47/ CASP3/ CBR4/ CCDC110/ CCDC111/ CDKN2AIP/ CLCN3              |
| 6D | 6  | 94661     | 26251349  | 26156688  | 2,44 | Trisomy    | ACOT13/ ALDH5A1/ ATXN1/ BMP6/ BPHL/ C6orf105/ C6orf114/ C6orf145/ C6orf146/ C6orf195/ C6orf201/ C6orf218/ C6orf52/ C6orf62/ CAGE1/ CAP2/ CCDC90A/ CD83/ CDKAL1/ CDYL        |

|    |    |           |           |           |      |            |                                                                                                                                                                                    |
|----|----|-----------|-----------|-----------|------|------------|------------------------------------------------------------------------------------------------------------------------------------------------------------------------------------|
| 6D | 6  | 26251350  | 26339549  | 88199     | 1,12 | Deletion   | HIST1H1E/ HIST1H2AD/ HIST1H2AE/ HIST1H2BD/ HIST1H2BE/ HIST1H2BF/ HIST1H2BG/ HIST1H3D/ HIST1H3E/ HIST1H4D/ HIST1H4E                                                                 |
| 6D | 6  | 26339550  | 28002125  | 1662575   | 2,86 | Trisomy    | ABT1/ BTN1A1/ BTN2A1/ BTN2A2/ BTN2A3/ BTN3A1/ BTN3A2/ BTN3A3/ C6orf41/ FKSG83/ GUSBL1/ HCG11/ HIST1H1B/ HIST1H1D/ HIST1H2AG/ HIST1H2AH/ HIST1H2AI/ HIST1H2AJ/ HIST1H2AK/ HIST1H2AL |
| 6D | 7  | 71213869  | 71233330  | 19461     | 1,10 | Deletion   | intron of CALN1                                                                                                                                                                    |
| 6D | 8  | 21254     | 146268960 | 146247706 | 2,87 | Trisomy    | ABRA/ ADAM18/ ADAM2/ ADAM28/ ADAM32/ ADAM3A/ ADAM5P/ ADAM7/ ADAM9/ ADAMDEC1/ ADCK5/ ADCY8/ ADHFE1/ ADRA1A/ ADRB3/ AGPAT5/ AGPAT6/ AMAC1L2/ ANGPT1/ ANGPT2                          |
| 6D | 9  | 36587     | 90416775  | 90380188  | 2,69 | Trisomy    | ACER2/ ACO1/ ADAMTSL1/ AGTPBP1/ AK3/ ALDH1A1/ ALDH1B1/ ANKRD18A/ ANKRD20A1/ ANKRD20A2/ ANKRD20A2/ ANKRD20A3/ ANKRD20A3/ ANKRD20A4/ ANXA1/ ANXA2P2/ APBA1/ APTX/ AQP3/ AQP7         |
| 6D | 9  | 90443655  | 140211216 | 49767561  | 2,47 | Trisomy    | ABCA1/ ABCA2/ ABL1/ ABO/ ACTL7A/ ACTL7B/ ADAMTS13/ ADAMTSL2/ AGPAT2/ AIF1L/ AK1/ AKAP2/ AKNA/ ALAD/ ALDOB/ ALG2/ AMBP/ ANAPC2/ ANGPTL2/ ANKRD19                                    |
| 6D | 10 | 63345767  | 63462585  | 116818    | 1,27 | Deletion   | contained within ARID5B                                                                                                                                                            |
| 6D | 12 | 11657913  | 11694365  | 36452     | 1,02 | Deletion   | region overlaps with 0.85% of ETV6                                                                                                                                                 |
| 6D | 14 | 18072124  | 21961276  | 3889152   | 2,80 | Trisomy    | ANG/ APEX1/ C14orf176/ CCNB1IP1/ CHD8/ FAM12A/ FAM12B/ FLJ10357/ HNRNPC/ KLHL33/ METT11D1/ METTL3/ MIR1201/ NDRG2/ OR10G2/ OR10G3/ OR11G2/ OR11H12/ OR11H4/ OR11H6                 |
| 6D | 14 | 22071213  | 67646239  | 45575026  | 2,87 | Trisomy    | ABHD12B/ ABHD4/ ACIN1/ ACTR10/ ADCY4/ AKAP5/ AKAP6/ AP1G2/ AP4S1/ ARF6/ ARG2/ ARHGAP5/ ARID4A/ ATL1/ ATP5S/ ATP6V1D/ BAZ1A/ BCL2L2/ BMP4/ BRMS1L                                   |
| 6D | 14 | 67791396  | 105211178 | 37419782  | 2,82 | Trisomy    | ABCD4/ ACOT1/ ACOT2/ ACOT4/ ACOT6/ ACTN1/ ACYP1/ ADAM20/ ADAM21/ ADAM21P/ ADCK1/ ADSSL1/ AHNK2/ AHS1A/ AK7/ AKT1/ ALDH6A1/ ALKBH1/ AMN/ ANGEL1                                     |
| 6D | 14 | 105613912 | 106354298 | 740386    | 2,82 | Trisomy    | LOC100133469                                                                                                                                                                       |
| 6D | 17 | 526       | 78643089  | 78642563  | 2,75 | Trisomy    | AANAT/ AARSD1/ AATF/ AATK/ ABCA10/ ABCA5/ ABCA6/ ABCA8/ ABCA9/ ABCC3/ ABHD15/ ABI3/ ABR/ ACACA/ ACADVL/ ACAP1/ ACBD4/ ACCN1/ ACE/ ACLY                                             |
| 6D | 18 | 1543      | 76116030  | 76114487  | 2,88 | Trisomy    | ABHD3/ ACAA2/ ADCYAP1/ ADNP2/ AFG3L2/ ALPK2/ ANKRD12/ ANKRD29/ ANKRD30B/ APCDD1/ AQP4/ ARHGAP28/ ASXL3/ ATP5A1/ ATP8B1/ ATP9B/ B4GALT6/ BCL2/ BRUNOL4/ C18orf1                     |
| 6D | 21 | 9758742   | 13376955  | 3618213   | 2,69 | Trisomy    | BAGE/ BAGE2/ BAGE3/ BAGE4/ BAGE5/ TPTE/ region overlaps with 1.23% of C21orf99                                                                                                     |
| 6D | 21 | 13376955  | 46921386  | 33544431  | 3,74 | Tetrasomy  | ABCC13/ ABCG1/ ADAMTS1/ ADAMTS5/ ADARB1/ AGPAT3/ AIRE/ APP/ ATP5J/ ATP5O/ B3GALT5/ BACE2/ BACH1/ BRWD1/ BTG3/ C21orf119/ C21orf121/ C21orf122/ C21orf125/ C21orf128                |
| 6D | X  | 108477    | 154887041 | 154778564 | 2,92 | Trisomy    | ABCB7/ ABCD1/ ACE2/ ACOT9/ ACRC/ ACSL4/ ACTRT1/ AFF2/ AGTR2/ AIFM1/ AKAP14/ AKAP4/ ALAS2/ ALG13/ AMELX/ AMMECR1/ AMOT/ ANKRD58/ AP1S2/ APEX2                                       |
| 6R | 1  | 25475486  | 25505128  | 29642     | 3,36 | Tetrasomy  | contained within RHD                                                                                                                                                               |
| 6R | 1  | 72538482  | 72581989  | 43507     | 3,13 | Trisomy    | region starts 17616 bp after NEGR1                                                                                                                                                 |
| 6R | 1  | 246820018 | 246863790 | 43772     | 3,52 | Tetrasomy  | OR2T10/ OR2T11                                                                                                                                                                     |
| 6R | 2  | 113879037 | 113930098 | 51061     | 0,44 | biDeletion | region overlaps with 35.96% of CBWD2                                                                                                                                               |
| 6R | 4  | 33443     | 162093382 | 162059939 | 2,88 | Trisomy    | AASDH/ ABCA11P/ ABCE1/ ABCG2/ ABLIM2/ ACCN5/ ACOX3/ ADAD1/ ADAMTS3/ ADD1/ ADH1A/ ADH1B/ ADH1C/ ADH4/ ADH5/ ADH6/ ADH7/ ADRA2C/ AFAP1/ AFF1                                         |

|    |    |           |           |           |      |            |                                                                                                                                                                                    |
|----|----|-----------|-----------|-----------|------|------------|------------------------------------------------------------------------------------------------------------------------------------------------------------------------------------|
| 6R | 4  | 162100039 | 162249209 | 149170    | 2,76 | Trisomy    | region ends 275290 bp before FSTL5                                                                                                                                                 |
| 6R | 4  | 162319797 | 191261905 | 28942108  | 2,83 | Trisomy    | AADAT/ ACSL1/ ADAM29/ AGA/ ANKRD37/ ANP32C/ ANXA10/ ASB5/ C4orf27/ C4orf38/ C4orf39/ C4orf41/ C4orf43/ C4orf47/ CASP3/ CBR4/ CCDC110/ CCDC111/ CDKN2AIP/ CLCN3                     |
| 6R | 5  | 57359593  | 57368213  | 8620      | 3,89 | Tetrasomy  | region ends 417354 bp before PLK2                                                                                                                                                  |
| 6R | 6  | 94661     | 26230190  | 26135529  | 2,91 | Trisomy    | ACOT13/ ALDH5A1/ ATXN1/ BMP6/ BPHL/ C6orf105/ C6orf114/ C6orf145/ C6orf146/ C6orf195/ C6orf201/ C6orf218/ C6orf52/ C6orf62/ CAGE1/ CAP2/ CCDC90A/ CD83/ CDKAL1/ CDYL               |
| 6R | 6  | 26251350  | 26339549  | 88199     | 0,33 | biDeletion | HIST1H1E/ HIST1H2AD/ HIST1H2AE/ HIST1H2BD/ HIST1H2BE/ HIST1H2BF/ HIST1H2BG/ HIST1H3D/ HIST1H3E/ HIST1H4D/ HIST1H4E                                                                 |
| 6R | 6  | 26339550  | 28002125  | 1662575   | 2,86 | Trisomy    | ABT1/ BTN1A1/ BTN2A1/ BTN2A2/ BTN2A3/ BTN3A1/ BTN3A2/ BTN3A3/ C6orf41/ FKSG83/ GUSBL1/ HCG11/ HIST1H1B/ HIST1H1D/ HIST1H2AG/ HIST1H2AH/ HIST1H2AI/ HIST1H2AJ/ HIST1H2AK/ HIST1H2AL |
| 6R | 6  | 28002125  | 28043042  | 40917     | 1,14 | Deletion   | OR2B6                                                                                                                                                                              |
| 6R | 6  | 77496677  | 77509400  | 12723     | 3,51 | Tetrasomy  | region starts 657621 bp after IMPG1                                                                                                                                                |
| 6R | 7  | 71213869  | 71233330  | 19461     | 1,10 | Deletion   | intron of CALN1                                                                                                                                                                    |
| 6R | 8  | 21254     | 146268960 | 146247706 | 2,85 | Trisomy    | ABRA/ ADAM18/ ADAM2/ ADAM28/ ADAM32/ ADAM3A/ ADAM5P/ ADAM7/ ADAM9/ ADAMDEC1/ ADCK5/ ADCY8/ ADHFE1/ ADRA1A/ ADRB3/ AGPAT5/ AGPAT6/ AMAC1L2/ ANGPT1/ ANGPT2                          |
| 6R | 9  | 36587     | 46221512  | 46184925  | 1,58 | Deletion   | ACER2/ ACO1/ ADAMTSL1/ AK3/ ALDH1B1/ ANKRD18A/ ANKRD20A2/ ANKRD20A2/ ANKRD20A3/ ANKRD20A3/ ANXA2P2/ APTX/ AQP3/ AQP7/ AQP7P3/ ARID3C/ B4GALT1/ BAG1/ BNC2/ C9orf100                |
| 6R | 9  | 46221512  | 85691836  | 39470324  | 2,52 | Trisomy    | ALDH1A1/ ANKRD20A1/ ANKRD20A3/ ANKRD20A4/ ANXA1/ APBA1/ AQP7P1/ AQP7P2/ C9orf103/ C9orf135/ C9orf40/ C9orf41/ C9orf57/ C9orf71/ C9orf85/ C9orf95/ CBWD3/ CBWD3/ CBWD5/ CBWD6       |
| 6R | 9  | 85706736  | 90416775  | 4710039   | 2,53 | Trisomy    | AGTPBP1/ C9orf153/ C9orf170/ C9orf64/ C9orf79/ CDK20/ CTSL1/ CTSL3/ DAPK1/ FAM75C1/ GAS1/ GOLM1/ HNRNPK/ ISCA1/ LOC389765/ LOC440173/ LOC645961/ MAK10/ MIR7-1/ NTRK2              |
| 6R | 9  | 90443655  | 140211216 | 49767561  | 2,47 | Trisomy    | ABCA1/ ABCA2/ ABL1/ ABO/ ACTL7A/ ACTL7B/ ADAMTSL13/ ADAMTSL2/ AGPAT2/ AIF1L/ AK1/ AKAP2/ AKNA/ ALAD/ ALDOB/ ALG2/ AMBP/ ANAPC2/ ANGPTL2/ ANKRD19                                   |
| 6R | 10 | 63345767  | 63462585  | 116818    | 0,69 | Deletion   | contained within ARID5B                                                                                                                                                            |
| 6R | 12 | 11636458  | 11692474  | 56016     | 1,07 | Deletion   | region ends 1581 bp before ETV6                                                                                                                                                    |
| 6R | 13 | 27596922  | 27713544  | 116622    | 1,04 | Deletion   | LOC100288730/ region overlaps with 88.23% of PAN3                                                                                                                                  |
| 6R | 14 | 18072124  | 21939309  | 3867185   | 2,92 | Trisomy    | ANG/ APEX1/ C14orf176/ CCNB1IP1/ CHD8/ FAM12A/ FAM12B/ FLJ10357/ HNRNPC/ KLHL33/ METT11D1/ METTL3/ MIR1201/ NDRG2/ OR10G2/ OR10G3/ OR11G2/ OR11H12/ OR11H4/ OR11H6                 |
| 6R | 14 | 22071213  | 67646239  | 45575026  | 2,86 | Trisomy    | ABHD12B/ ABHD4/ ACIN1/ ACTR10/ ADCY4/ AKAP5/ AKAP6/ AP1G2/ AP4S1/ ARF6/ ARG2/ ARHGAP5/ ARID4A/ ATL1/ ATP5S/ ATP6V1D/ BAZ1A/ BCL2L2/ BMP4/ BRMS1L                                   |
| 6R | 14 | 67791396  | 105227362 | 37435966  | 2,91 | Trisomy    | ABCD4/ ACOT1/ ACOT2/ ACOT4/ ACOT6/ ACTN1/ ACYP1/ ADAM20/ ADAM21/ ADAM21P/ ADCK1/ ADSSL1/ AHNAK2/ AHSA1/ AK7/ AKT1/ ALDH6A1/ ALKBH1/ AMN/ ANGEL1                                    |
| 6R | 14 | 105613912 | 106354298 | 740386    | 2,61 | Trisomy    | LOC100133469                                                                                                                                                                       |
| 6R | 16 | 3720823   | 3751535   | 30712     | 1,05 | Deletion   | contained within CREBBP                                                                                                                                                            |
| 6R | 17 | 526       | 78643089  | 78642563  | 2,86 | Trisomy    | AANAT/ AARSD1/ AATF/ AATK/ ABCA10/ ABCA5/ ABCA6/ ABCA8/ ABCA9/ ABCC3/ ABHD15/ ABI3/ ABR/ ACACA/ ACADVL/ ACAP1/ ACBD4/ ACCN1/ ACE/ ACLY                                             |

|    |    |           |           |           |      |           |                                                                                                                                                                              |
|----|----|-----------|-----------|-----------|------|-----------|------------------------------------------------------------------------------------------------------------------------------------------------------------------------------|
| 6R | 18 | 1543      | 51156026  | 51154483  | 2,91 | Trisomy   | ABHD3/ ACAA2/ ADCYAP1/ AFG3L2/ ANKRD12/ ANKRD29/ ANKRD30B/ APCDD1/ AQP4/ ARHGAP28/ ASXL3/ ATP5A1/ B4GALT6/ BRUNOL4/ C18orf1/ C18orf10/ C18orf16/ C18orf18/ C18orf19/ C18orf2 |
| 6R | 18 | 51208988  | 76116030  | 24907042  | 2,91 | Trisomy   | ADNP2/ ALPK2/ ATP8B1/ ATP9B/ BCL2/ C18orf20/ C18orf22/ C18orf55/ C18orf62/ CBLN2/ CCBE1/ CCDC102B/ CD226/ CDH19/ CDH20/ CDH7/ CNDP1/ CNDP2/ CPLX4/ CTDP1                     |
| 6R | 19 | 40547586  | 40556136  | 8550      | 3,13 | Tetrasomy | region starts 4358 bp after FFAR3                                                                                                                                            |
| 6R | 21 | 9758742   | 13376955  | 3618213   | 2,56 | Trisomy   | BAGE/ BAGE2/ BAGE3/ BAGE4/ BAGE5/ TPTE/ region overlaps with 1.23% of C21orf99                                                                                               |
| 6R | 21 | 13376955  | 46921386  | 33544431  | 3,79 | Tetrasomy | ABCC13/ ABCG1/ ADAMTS1/ ADAMTS5/ ADARB1/ AGPAT3/ AIRE/ APP/ ATP5J/ ATP5O/ B3GALT5/ BACE2/ BACH1/ BRWD1/ BTG3/ C21orf119/ C21orf121/ C21orf122/ C21orf125/ C21orf128          |
| 6R | X  | 108477    | 154887041 | 154778564 | 2,88 | Trisomy   | ABCB7/ ABCD1/ ACE2/ ACOT9/ ACRC/ ACSL4/ ACTRT1/ AFF2/ AGTR2/ AIFM1/ AKAP14/ AKAP4/ ALAS2/ ALG13/ AMELX/ AMMECR1/ AMOT/ ANKRD58/ AP1S2/ APEX2                                 |
| 7D | 4  | 2281      | 34473641  | 34471360  | 2,49 | Trisomy   | ABCA11P/ ABLIM2/ ACOX3/ ADD1/ ADRA2C/ AFAP1/ ANAPC4/ ATP5I/ BOD1L/ BST1/ C1QTNF7/ C4orf10/ C4orf23/ C4orf42/ C4orf44/ C4orf48/ C4orf50/ C4orf52/ C4orf6/ CC2D2A              |
| 7D | 4  | 34481663  | 70196203  | 35714540  | 2,44 | Trisomy   | AASDH/ APBB2/ ARAP2/ ARL9/ ATP10D/ ATP8A1/ BEND4/ C4orf14/ C4orf19/ C4orf34/ CENPC1/ CEP135/ CHIC2/ CHRNA9/ CLOCK/ CNGA1/ COMMD8/ CORIN/ COX7B2/ CWH43                       |
| 7D | 4  | 70266988  | 173659006 | 103392018 | 2,45 | Trisomy   | AADAT/ ABCE1/ ABCG2/ ACCN5/ ADAD1/ ADAMTS3/ ADH1A/ ADH1B/ ADH1C/ ADH4/ ADH5/ ADH6/ ADH7/ AFF1/ AFM/ AFP/ AGPAT9/ AGXT2L1/ AIMP1/ ALB                                         |
| 7D | 4  | 173664981 | 191261905 | 17596924  | 2,43 | Trisomy   | ACSL1/ ADAM29/ AGA/ ANKRD37/ ASB5/ C4orf38/ C4orf41/ C4orf47/ CASP3/ CCDC110/ CCDC111/ CDKN2AIP/ CLDN22/ CYP4V2/ DCTD/ DUX4/ ENPP6/ F11/ FAM149A/ FAM92A3                    |
| 7D | 8  | 21254     | 39352288  | 39331034  | 2,48 | Trisomy   | ADAM28/ ADAM32/ ADAM7/ ADAM9/ ADAMDEC1/ ADRA1A/ ADRB3/ AGPAT5/ AMAC1L2/ ANGPT2/ ARHGEF10/ ASAH1/ ASH2L/ ATP6V1B2/ BAG4/ BIN3/ BLK/ BMP1/ BNIP3L/ BRF2                        |
| 7D | 8  | 39503569  | 146268960 | 106765391 | 2,49 | Trisomy   | ABRA/ ADAM18/ ADAM2/ ADCK5/ ADCY8/ ADHFE1/ AGPAT6/ ANGPT1/ ANK1/ ANKRD46/ ANXA13/ AP3M2/ ARC/ ARFGEF1/ ARMC1/ ASAP1/ ASAP1IT1/ ASPH/ ATAD2/ ATP6V0D2                         |
| 7D | 10 | 62759     | 135356695 | 135293936 | 2,52 | Trisomy   | A1CF/ ABCC2/ ABI1/ ABLIM1/ ACADSB/ ACBD5/ ACBD7/ ACSL5/ ACTA2/ ACTR1A/ ADAM12/ ADAM8/ ADAMTS14/ ADARB2/ ADD3/ ADK/ ADO/ ADRA2A/ ADRB1/ AFAP1L2                               |
| 7D | 11 | 36554844  | 36593313  | 38469     | 1,30 | Deletion  | RAG2/ region overlaps with 53.67% of C11orf74 / region overlaps with 7.91% of RAG1                                                                                           |
| 7D | 14 | 18072124  | 106356483 | 88284359  | 2,44 | Trisomy   | ABCD4/ ABHD12B/ ABHD4/ ACIN1/ ACOT1/ ACOT2/ ACOT4/ ACOT6/ ACTN1/ ACTR10/ ACYP1/ ADAM20/ ADAM21/ ADAM21P/ ADAM6/ ADCK1/ ADCY4/ ADSSL1/ AHNAK2/ AHSA1                          |
| 7D | 20 | 9305      | 1509289   | 1499984   | 1,25 | Deletion  | ANGPT4/ C20orf202/ C20orf46/ C20orf54/ C20orf96/ CSNK2A1/ DEFB125/ DEFB126/ DEFB127/ DEFB128/ DEFB129/ DEFB132/ FAM110A/ FKBP1A/ NRSN2/ NSFL1C/ PSMF1/ RAD21L1/ RBCK1/ RSPO4 |
| 7D | 20 | 1546026   | 62426598  | 60880572  | 1,25 | Deletion  | ABHD12/ ACOT8/ ACSS1/ ACSS2/ ACTR5/ ADA/ ADAM33/ ADIG/ ADNP/ ADRA1D/ ADRM1/ AHCY/ ANKRD5/ APCDD1L/ ARFGAP1/ ARFGEF2/ ARFRP1/ ASIP/ ASXL1/ ATP5E                              |
| 7D | 21 | 9758742   | 13352761  | 3594019   | 2,49 | Trisomy   | BAGE/ BAGE2/ BAGE3/ BAGE4/ BAGE5/ TPTE/ region overlaps with 0.57% of C21orf99                                                                                               |
| 7D | 21 | 13375178  | 46921386  | 33546208  | 3,28 | Tetrasomy | ABCC13/ ABCG1/ ADAMTS1/ ADAMTS5/ ADARB1/ AGPAT3/ AIRE/ APP/ ATP5J/ ATP5O/ B3GALT5/ BACE2/ BACH1/ BRWD1/ BTG3/ C21orf119/ C21orf121/ C21orf122/ C21orf125/ C21orf128          |

|    |    |           |           |           |      |            |                                                                                                                                                                            |
|----|----|-----------|-----------|-----------|------|------------|----------------------------------------------------------------------------------------------------------------------------------------------------------------------------|
| 7D | X  | 108477    | 154887041 | 154778564 | 2,65 | Trisomy    | ABCB7/ ABCD1/ ACE2/ ACOT9/ ACRC/ ACSL4/ ACTRT1/ AFF2/ AGTR2/ AIFM1/ AKAP14/ AKAP4/ ALAS2/ ALG13/ AMELX/ AMMECR1/ AMOT/ ANKRD58/ AP1S2/ APEX2                               |
| 7R | 8  | 21254     | 39352288  | 39331034  | 2,48 | Trisomy    | ADAM28/ ADAM32/ ADAM7/ ADAM9/ ADAMDEC1/ ADRA1A/ ADRB3/ AGPAT5/ AMAC1L2/ ANGPT2/ ARHGEF10/ ASAH1/ ASH2L/ ATP6V1B2/ BAG4/ BIN3/ BLK/ BMP1/ BNIP3L/ BRF2                      |
| 7R | 8  | 39503569  | 146268960 | 106765391 | 2,49 | Trisomy    | ABRA/ ADAM18/ ADAM2/ ADCK5/ ADCY8/ ADHFE1/ AGPAT6/ ANGPT1/ ANK1/ ANKRD46/ ANXA13/ AP3M2/ ARC/ ARFGFE1/ ARMC1/ ASAP1/ ASAP1IT1/ ASPH/ ATAD2/ ATP6VD2                        |
| 7R | 9  | 36587     | 21880144  | 21843557  | 1,08 | Deletion   | ACER2/ ADAMTSL1/ AK3/ BNC2/ C9orf123/ C9orf150/ C9orf46/ C9orf66/ C9orf68/ C9orf70/ C9orf93/ CBWD1/ CD274/ CDC37L1/ CER1/ CNTLN/ DENND4C/ DMRT1/ DMRT2/ DMRT3              |
| 7R | 9  | 21880145  | 22141940  | 261795    | 0,33 | biDeletion | C9orf53/ CDKN2A/ CDKN2B/ CDKN2BAS                                                                                                                                          |
| 7R | 9  | 22141941  | 39364238  | 17222297  | 1,03 | Deletion   | ACO1/ ALDH1B1/ ANKRD18A/ ANXA2P2/ APTX/ AQP3/ AQP7/ ARID3C/ B4GALT1/ BAG1/ C9orf100/ C9orf11/ C9orf122/ C9orf128/ C9orf131/ C9orf144/ C9orf144B/ C9orf23/ C9orf24/ C9orf25 |
| 7R | 9  | 70136749  | 140211216 | 70074467  | 2,60 | Trisomy    | ABCA1/ ABCA2/ ABL1/ ABO/ ACTL7A/ ACTL7B/ ADAMTS13/ ADAMTSL2/ AGPAT2/ AGTPBP1/ AIF1L/ AK1/ AKAP2/ AKNA/ ALAD/ ALDH1A1/ ALDOB/ ALG2/ AMBP/ ANAPC2                            |
| 7R | 10 | 62759     | 135356695 | 135293936 | 2,63 | Trisomy    | A1CF/ ABCC2/ ABI1/ ABLIM1/ ACADSB/ ACBD5/ ACBD7/ ACSL5/ ACTA2/ ACTR1A/ ADAM12/ ADAM8/ ADAMTS14/ ADARB2/ ADD3/ ADK/ ADO/ ADRA2A/ ADRB1/ AFAP1L2                             |
| 7R | 11 | 36556936  | 36591347  | 34411     | 1,05 | Deletion   | RAG2/ region overlaps with 2.77% of RAG1 / region overlaps with 54.28% of C11orf74                                                                                         |
| 7R | 14 | 18072124  | 106356483 | 88284359  | 2,44 | Trisomy    | ABCD4/ ABHD12B/ ABHD4/ ACIN1/ ACOT1/ ACOT2/ ACOT4/ ACOT6/ ACTN1/ ACTR10/ ACYP1/ ADAM20/ ADAM21/ ADAM21P/ ADAM6/ ADCK1/ ADCY4/ ADSSL1/ AHNAK2/ AHSA1                        |
| 7R | 16 | 1         | 28183744  | 28183743  | 2,70 | UPIT       | A2BP1/ ABAT/ ABCA17P/ ABCA3/ ABCC1/ ABCC6/ ABCC6P1/ ABCC6P2/ ACSM1/ ACSM2A/ ACSM2B/ ACSM3/ ACSM5/ ADCY9/ ALG1/ AMDHD2/ ANKS3/ ANKS4B/ AQP8/ ARHGAP17                       |
| 7R | 16 | 28183745  | 88815037  | 60631292  | 2,58 | Trisomy    | AARS/ ABCC11/ ABCC12/ ACD/ ACSF3/ ADAD2/ ADAMTS18/ ADAT1/ ADCY7/ AFG3L1/ AGRP/ AHSP/ AKTIP/ ALDOA/ AMFR/ ANKRD11/ ANKRD26P1/ AP1G1/ APOB48R/ APRT                          |
| 7R | 20 | 1509289   | 1546026   | 36737     | 2,96 | Trisomy    | intron of SIRPB1/ region overlaps with 54.55% of SIRPB1                                                                                                                    |
| 7R | 21 | 9758742   | 13352761  | 3594019   | 2,49 | Trisomy    | BAGE/ BAGE2/ BAGE3/ BAGE4/ BAGE5/ TPTE/ region overlaps with 0.57% of C21orf99                                                                                             |
| 7R | 21 | 13352761  | 46921386  | 33568625  | 3,41 | Tetrasomy  | ABCC13/ ABCG1/ ADAMTS1/ ADAMTS5/ ADARB1/ AGPAT3/ AIRE/ APP/ ATP5J/ ATP5O/ B3GALT5/ BACE2/ BACH1/ BRWD1/ BTG3/ C21orf119/ C21orf121/ C21orf122/ C21orf125/ C21orf128        |
| 7R | X  | 108477    | 154887041 | 154778564 | 2,65 | Trisomy    | ABCB7/ ABCD1/ ACE2/ ACOT9/ ACRC/ ACSL4/ ACTRT1/ AFF2/ AGTR2/ AIFM1/ AKAP14/ AKAP4/ ALAS2/ ALG13/ AMELX/ AMMECR1/ AMOT/ ANKRD58/ AP1S2/ APEX2                               |
| 8D | 1  | 144970736 | 217457824 | 72487088  | 2,81 | UPIT       | ABL2/ ACBD6/ ACP6/ ADAM15/ ADAMTS4/ ADAMTSL4/ ADAR/ ADCY10/ ADIPOR1/ ADORA1/ AIM2/ ALDH9A1/ ANGEL2/ ANGPTL1/ ANKRD36BL1/ ANKRD45/ ANP32E/ ANXA9/ APCS/ APH1A               |
| 8D | 2  | 184697832 | 185172317 | 474485    | 1,33 | Deletion   | region overlaps with 0.21% of ZNF804A                                                                                                                                      |
| 8D | 4  | 506       | 191250146 | 191249640 | 2,69 | Trisomy    | AADAT/ AASDH/ ABCA11P/ ABCE1/ ABCG2/ ABLIM2/ ACCN5/ ACOX3/ ACSL1/ ADAD1/ ADAM29/ ADAMTS3/ ADD1/ ADH1A/ ADH1B/ ADH1C/ ADH4/ ADH5/ ADH6/ ADH7                                |
| 8D | 6  | 94803     | 170804144 | 170709341 | 2,67 | Trisomy    | AARS2/ ABCC10/ ABCF1/ ABT1/ ACAT2/ ACOT13/ ADAT2/ AGER/ AGPAT1/ AGPAT4/ AHI1/ AIF1/ AIG1/ AIM1/ AKAP12/ AKAP7/ AKD1/ AKIRIN2/ ALDH5A1/ ALDH8A1                             |

|    |    |           |           |           |      |           |                                                                                                                                                                    |
|----|----|-----------|-----------|-----------|------|-----------|--------------------------------------------------------------------------------------------------------------------------------------------------------------------|
| 8D | 7  | 52911     | 35307355  | 35254444  | 1,57 | Deletion  | AAA1/ ABCB5/ ACTB/ ADAP1/ ADCYAP1R1/ AGR2/ AGR3/ AHR/ AIMP2/ AMZ1/ ANKMY2/ AQP1/ ARL4A/ AVL9/ BBS9/ BMPER/ BZW2/ C1GALT1/ C7orf16/ C7orf20                         |
| 8D | 7  | 35307355  | 57844174  | 22536819  | 1,57 | Deletion  | ABCA13/ ADCY1/ AEBP1/ AMPH/ ANLN/ AOAH/ BLVRA/ C7orf10/ C7orf11/ C7orf25/ C7orf36/ C7orf40/ C7orf44/ C7orf57/ C7orf65/ C7orf69/ C7orf72/ CAMK2B/ CCM2/ CCT6A       |
| 8D | 7  | 57844174  | 158811019 | 100966845 | 2,66 | Trisomy   | AASS/ ABCB1/ ABCB4/ ABCB8/ ABCF2/ ABHD11/ ABP1/ ACCN3/ ACHE/ ACN9/ ACTL6B/ ACTR3B/ ACTR3C/ ADAM22/ ADCK2/ AGAP3/ AGBL3/ AGFG2/ AGK/ AHCYL2                         |
| 8D | 9  | 36360881  | 36916361  | 555480    | 2,69 | Trisomy   | MELK/ region overlaps with 15.81% of PAX5 / region overlaps with 5.30% of RNF38 / region overlaps with 5.41% of RNF38 / region overlaps with 5.46% of RNF38        |
| 8D | 10 | 67340     | 135355061 | 135287721 | 2,71 | Trisomy   | A1CF/ ABCC2/ ABI1/ ABLIM1/ ACADSB/ ACBD5/ ACBD7/ ACSL5/ ACTA2/ ACTR1A/ ADAM12/ ADAM8/ ADAMTS14/ ADARB2/ ADD3/ ADK/ ADO/ ADRA2A/ ADRB1/ AFAP1L2                     |
| 8D | 11 | 188950    | 79991856  | 79802906  | 2,65 | Trisomy   | ABCC8/ ABTB2/ ACCS/ ACCSL/ ACER3/ ACP2/ ACTN3/ ACY3/ ADM/ ADRBK1/ AGBL2/ AHNAK/ AIP/ ALDH3B1/ ALDH3B2/ ALG8/ ALKBH3/ ALX4/ AMBRA1/ AMPD3                           |
| 8D | 11 | 90659776  | 95095746  | 4435970   | 2,74 | Trisomy   | AMOTL1/ ANKRD49/ C11orf54/ C11orf75/ C11orf90/ CCDC67/ CWC15/ ENDOD1/ FAT3/ FOLR4/ FUT4/ GPR83/ HEPHL1/ KDM4D/ KDM4DL/ KIAA1731/ MED17/ MIR1304/ MRE11A/ MTNR1B    |
| 8D | 11 | 117039454 | 134449983 | 17410529  | 2,69 | Trisomy   | ABCG4/ ACAD8/ ACRV1/ ADAMTS15/ ADAMTS8/ AMICA1/ APLP2/ ARCN1/ ARHGEF12/ ASAM/ ATP5L/ B3GAT1/ BARX2/ BCL9L/ BLID/ BSX/ C11orf45/ C11orf60/ C11orf61/ C11orf63       |
| 8D | 12 | 11778400  | 11833195  | 54795     | 1,27 | Deletion  | contained within ETV6                                                                                                                                              |
| 8D | 14 | 18085723  | 21961276  | 3875553   | 3,29 | Tetrasomy | ANG/ APEX1/ C14orf176/ CCNB1IP1/ CHD8/ FAM12A/ FAM12B/ FLJ10357/ HNRNPC/ KLHL33/ METT11D1/ METTL3/ MIR1201/ NDRG2/ OR10G2/ OR10G3/ OR11G2/ OR11H12/ OR11H4/ OR11H6 |
| 8D | 14 | 22040131  | 69076554  | 47036423  | 3,32 | Tetrasomy | ABHD12B/ ABHD4/ ACIN1/ ACTN1/ ACTR10/ ADCY4/ AKAP5/ AKAP6/ AP1G2/ AP4S1/ ARF6/ ARG2/ ARHGAP5/ ARID4A/ ATL1/ ATP5S/ ATP6V1D/ BAZ1A/ BCL2L2/ BMP4                    |
| 8D | 14 | 69091696  | 105406903 | 36315207  | 3,34 | Tetrasomy | ABCD4/ ACOT1/ ACOT2/ ACOT4/ ACOT6/ ACYP1/ ADAM20/ ADAM21/ ADAM21P/ ADCK1/ ADSSL1/ AHNAK2/ AHS1/ AK7/ AKT1/ ALDH6A1/ ALKBH1/ AMN/ ANGEL1/ ANKRD9                    |
| 8D | 18 | 33309     | 76115555  | 76082246  | 2,70 | Trisomy   | ABHD3/ ACAA2/ ADCYAP1/ ADNP2/ AFG3L2/ ALPK2/ ANKRD12/ ANKRD29/ ANKRD30B/ APCDD1/ AQP4/ ARHGAP28/ ASXL3/ ATP5A1/ ATP8B1/ ATP9B/ B4GALT6/ BCL2/ BRUNOL4/ C18orf1     |
| 8D | 21 | 9758742   | 46942557  | 37183815  | 3,31 | Tetrasomy | ABCC13/ ABCG1/ ADAMTS1/ ADAMTS5/ ADARB1/ AGPAT3/ AIRE/ APP/ ATP5J/ ATP5O/ B3GALT5/ BACE2/ BACH1/ BAGE/ BAGE2/ BAGE3/ BAGE4/ BAGE5/ BRWD1/ BTG3                     |
| 8D | 22 | 20846031  | 20915779  | 69748     | 1,29 | Deletion  | region ends 13421 bp before VPREB1                                                                                                                                 |
| 8D | X  | 142664    | 154582820 | 154440156 | 3,48 | Tetrasomy | ABCB7/ ABCD1/ ACE2/ ACOT9/ ACRC/ ACSL4/ ACTRT1/ AFF2/ AGTR2/ AIFM1/ AKAP14/ AKAP4/ ALAS2/ ALG13/ AMELX/ AMMECR1/ AMOT/ ANKRD58/ AP1S2/ APEX2                       |
| 8R | 1  | 144970736 | 217457824 | 72487088  | 2,74 | UPIT      | ABL2/ ACBD6/ ACP6/ ADAM15/ ADAMTS4/ ADAMTSL4/ ADAR/ ADCY10/ ADIPOR1/ ADORA1/ AIM2/ ALDH9A1/ ANGEL2/ ANGPL1/ ANKRD36BL1/ ANKRD45/ ANP32E/ ANXA9/ APCS/ APH1A        |
| 8R | 2  | 184697832 | 185172317 | 474485    | 1,33 | Deletion  | region overlaps with 0.21% of ZNF804A                                                                                                                              |
| 8R | 4  | 506       | 191250146 | 191249640 | 2,63 | Trisomy   | AADAT/ AASDH/ ABCA11P/ ABCE1/ ABCG2/ ABLIM2/ ACCN5/ ACOX3/ ACSL1/ ADAD1/ ADAM29/ ADAMTS3/ ADD1/ ADH1A/ ADH1B/ ADH1C/ ADH4/ ADH5/ ADH6/ ADH7                        |

|    |    |           |           |           |      |           |                                                                                                                                                                       |
|----|----|-----------|-----------|-----------|------|-----------|-----------------------------------------------------------------------------------------------------------------------------------------------------------------------|
| 8R | 5  | 59233251  | 128061178 | 68827927  | 2,60 | Trisomy   | ACOT12/ ADAMTS6/ AGGF1/ ALDH7A1/ ANKRA2/ ANKRD31/ ANKRD32/ ANKRD34B/ AP3B1/ AP3S1/ APC/ ARRDC3/ ARSB/ ARSK/ ATG10/ ATG12/ ATP6AP1L/ BDP1/ BHMT/ BHMT2                 |
| 8R | 6  | 94803     | 170804144 | 170709341 | 2,60 | Trisomy   | AARS2/ ABCC10/ ABCF1/ ABT1/ ACAT2/ ACOT13/ ADAT2/ AGER/ AGPAT1/ AGPAT4/ AHI1/ AIF1/ AIG1/ AIM1/ AKAP12/ AKAP7/ AKD1/ AKIRIN2/ ALDH5A1/ ALDH8A1                        |
| 8R | 7  | 52911     | 57844174  | 57791263  | 1,34 | Deletion  | AAA1/ ABCA13/ ABCB5/ ACTB/ ADAP1/ ADCY1/ ADCYAP1R1/ AEBP1/ AGR2/ AGR3/ AHR/ AIMP2/ AMPH/ AMZ1/ ANKMY2/ ANLN/ AOAH/ AQP1/ ARL4A/ AVL9                                  |
| 8R | 7  | 57844174  | 158811019 | 100966845 | 2,59 | Trisomy   | AASS/ ABCB1/ ABCB4/ ABCB8/ ABCF2/ ABHD11/ ABP1/ ACCN3/ ACHE/ ACN9/ ACTL6B/ ACTR3B/ ACTR3C/ ADAM22/ ADCK2/ AGAP3/ AGBL3/ AGFG2/ AGK/ AHCYL2                            |
| 8R | 8  | 39472473  | 39510259  | 37786     | 3,72 | Tetrasomy | region overlaps with 71.87% of ADAM3A                                                                                                                                 |
| 8R | 9  | 36360881  | 36916361  | 555480    | 2,69 | Trisomy   | MELK/ region overlaps with 15.81% of PAX5 / region overlaps with 5.30% of RNF38 / region overlaps with 5.41% of RNF38 / region overlaps with 5.46% of RNF38           |
| 8R | 10 | 67340     | 135355061 | 135287721 | 2,64 | Trisomy   | A1CF/ ABCC2/ AB1/ ABLIM1/ ACADSB/ ACBD5/ ACBD7/ ACSL5/ ACTA2/ ACTR1A/ ADAM12/ ADAM8/ ADAMTS14/ ADARB2/ ADD3/ ADK/ ADO/ ADRA2A/ ADRB1/ AFAP1L2                         |
| 8R | 11 | 188950    | 79991856  | 79802906  | 2,65 | Trisomy   | ABCC8/ ABTB2/ ACCS/ ACCSL/ ACER3/ ACP2/ ACTN3/ ACY3/ ADM/ ADRBK1/ AGBL2/ AHNAK/ AIP/ ALDH3B1/ ALDH3B2/ ALG8/ ALKBH3/ ALX4/ AMBRA1/ AMPD3                              |
| 8R | 11 | 90659776  | 95095746  | 4435970   | 2,74 | Trisomy   | AMOTL1/ ANKRD49/ C11orf54/ C11orf75/ C11orf90/ CCDC67/ CWC15/ ENDOD1/ FAT3/ FOLR4/ FUT4/ GPR83/ HEPHL1/ KDM4D/ KDM4DL/ KIAA1731/ MED17/ MIR1304/ MRE11A/ MTNR1B       |
| 8R | 11 | 117039454 | 134449983 | 17410529  | 2,69 | Trisomy   | ABCG4/ ACAD8/ ACRV1/ ADAMTS15/ ADAMTS8/ AMICA1/ APLP2/ ARCN1/ ARHGFE12/ ASAM/ ATP5L/ B3GAT1/ BARX2/ BCL9L/ BLID/ BSX/ C11orf45/ C11orf60/ C11orf61/ C11orf63          |
| 8R | 12 | 11778400  | 11833195  | 54795     | 1,27 | Deletion  | contained within ETV6                                                                                                                                                 |
| 8R | 14 | 18085723  | 21961276  | 3875553   | 3,19 | Tetrasomy | ANG/ APEX1/ C14orf176/ CCNB1IP1/ CHD8/ FAM12A/ FAM12B/ FLJ10357/ HNRNPC/ KLHL33/ METT11D1/ METTL3/ MIR1201/ NDRG2/ OR10G2/ OR10G3/ OR11G2/ OR11H12/ OR11H4/ OR11H6    |
| 8R | 14 | 22045554  | 105406903 | 83361349  | 3,17 | Tetrasomy | ABCD4/ ABHD12B/ ABHD4/ ACIN1/ ACOT1/ ACOT2/ ACOT4/ ACOT6/ ACTN1/ ACTR10/ ACYP1/ ADAM20/ ADAM21/ ADAM21P/ ADCK1/ ADCY4/ ADSSL1/ AHNAK2/ AHS1/ AK7                      |
| 8R | 18 | 33309     | 76115555  | 76082246  | 2,65 | Trisomy   | ABHD3/ ACAA2/ ADCYAP1/ ADNP2/ AFG3L2/ ALPK2/ ANKRD12/ ANKRD29/ ANKRD30B/ APCDD1/ AQP4/ ARHGAP28/ ASXL3/ ATP5A1/ ATP8B1/ ATP9B/ B4GALT6/ BCL2/ BRUNOL4/ C18orf1        |
| 8R | 21 | 9758742   | 46942557  | 37183815  | 3,31 | Tetrasomy | ABCC13/ ABCG1/ ADAMTS1/ ADAMTS5/ ADARB1/ AGPAT3/ AIRE/ APP/ ATP5J/ ATP5O/ B3GALT5/ BACE2/ BACH1/ BAGE/ BAGE2/ BAGE3/ BAGE4/ BAGE5/ BRWD1/ BTG3                        |
| 8R | 22 | 20888031  | 20930991  | 42960     | 1,06 | Deletion  | VPREB1                                                                                                                                                                |
| 8R | X  | 142664    | 154582820 | 154440156 | 3,29 | Tetrasomy | ABCB7/ ABCD1/ ACE2/ ACOT9/ ACRC/ ACSL4/ ACTRT1/ AFF2/ AGTR2/ AIFM1/ AKAP14/ AKAP4/ ALAS2/ ALG13/ AMELX/ AMMECR1/ AMOT/ ANKRD58/ AP1S2/ APEX2                          |
| 9D | 1  | 143660269 | 206896849 | 63236580  | 2,42 | Trisomy   | ABL2/ ACBD6/ ACP6/ ADAM15/ ADAMTS4/ ADAMTSL4/ ADAR/ ADCY10/ ADIPOR1/ ADORA1/ AIM2/ ALDH9A1/ ANGPL1/ ANKRD34A/ ANKRD35/ ANKRD36BL1/ ANKRD45/ ANP32E/ ANXA9/ APCS       |
| 9D | 1  | 244730175 | 247249719 | 2519544   | 2,53 | Trisomy   | AHCTF1/ C1orf150/ C1orf229/ CNST/ LOC148824/ LOC149134/ LOC646627/ NLRP3/ OR11L1/ OR13G1/ OR14A16/ OR14C36/ OR14I1/ OR1C1/ OR2AK2/ OR2B11/ OR2C3/ OR2G2/ OR2G3/ OR2G6 |



|    |    |           |           |           |      |           |                                                                                                                                                                    |
|----|----|-----------|-----------|-----------|------|-----------|--------------------------------------------------------------------------------------------------------------------------------------------------------------------|
| 9D | 4  | 506       | 9822874   | 9822368   | 2,85 | Trisomy   | ABCA11P/ ABLIM2/ ACOX3/ ADD1/ ADRA2C/ AFAP1/ ATP5/ C4orf10/ C4orf23/ C4orf42/ C4orf44/ C4orf48/ C4orf50/ C4orf6/ CCDC96/ CNO/ CPLX1/ CPZ/ CRIPAK/ CRMP1            |
| 9D | 4  | 9843736   | 191250146 | 181406410 | 2,68 | Trisomy   | AADAT/ AASDH/ ABCE1/ ABCG2/ ACCN5/ ACSL1/ ADAD1/ ADAM29/ ADAMTS3/ ADH1A/ ADH1B/ ADH1C/ ADH4/ ADH5/ ADH6/ ADH7/ AFF1/ AFM/ AFP/ AGA                                 |
| 9D | 5  | 72568     | 95826411  | 95753843  | 2,63 | Trisomy   | ACOT12/ ACTBL2/ ADAMTS12/ ADAMTS16/ ADAMTS6/ ADCY2/ AGGF1/ AGXT2/ AHRR/ AMACR/ ANKH/ ANKRA2/ ANKRD31/ ANKRD32/ ANKRD33B/ ANKRD34B/ ANKRD55/ AP3B1/ ARL15/ ARRDC3   |
| 9D | 5  | 150183011 | 150212275 | 29264     | 0,85 | Deletion  | IRGM                                                                                                                                                               |
| 9D | 6  | 94803     | 170804144 | 170709341 | 2,64 | Trisomy   | AARS2/ ABCC10/ ABCF1/ ABT1/ ACAT2/ ACOT13/ ADAT2/ AGER/ AGPAT1/ AGPAT4/ AHI1/ AIF1/ AIG1/ AIM1/ AKAP12/ AKAP7/ AKD1/ AKIRIN2/ ALDH5A1/ ALDH8A1                     |
| 9D | 8  | 21193     | 146268972 | 146247779 | 2,64 | Trisomy   | ABRA/ ADAM18/ ADAM2/ ADAM28/ ADAM32/ ADAM3A/ ADAM5P/ ADAM7/ ADAM9/ ADAMDEC1/ ADCK5/ ADCY8/ ADHFE1/ ADRA1A/ ADRB3/ AGPAT5/ AGPAT6/ AMAC1L2/ ANGPT1/ ANGPT2          |
| 9D | 10 | 67340     | 135355061 | 135287721 | 3,21 | Tetrasomy | A1CF/ ABCC2/ ABI1/ ABLIM1/ ACADSB/ ACBD5/ ACBD7/ ACSL5/ ACTA2/ ACTR1A/ ADAM12/ ADAM8/ ADAMTS14/ ADARB2/ ADD3/ ADK/ ADO/ ADRA2A/ ADRB1/ AFAP1L2                     |
| 9D | 11 | 188950    | 5739858   | 5550908   | 2,61 | Trisomy   | ANO9/ AP2A2/ ART1/ ART5/ ASCL2/ ATHL1/ B4GALNT4/ BET1L/ BRSK2/ C11orf21/ C11orf35/ C11orf36/ C11orf40/ CARS/ CD151/ CD81/ CDKN1C/ CEND1/ CHID1/ CHRNA10            |
| 9D | 11 | 5757883   | 134449983 | 128692100 | 2,62 | Trisomy   | AASDHPT/ ABCC8/ ABCG4/ ABTB2/ ACAD8/ ACAT1/ ACCS/ ACCSL/ ACER3/ ACP2/ ACRV1/ ACTN3/ ACY3/ ADAMTS15/ ADAMTS8/ ADM/ ADRBK1/ AGBL2/ AHNAK/ AIP                        |
| 9D | 12 | 20703     | 132287719 | 132267016 | 2,63 | Trisomy   | A2M/ A2ML1/ AAAS/ AACS/ ABCB9/ ABCC9/ ABCD2/ ACACB/ ACAD10/ ACADS/ ACCN2/ ACRBP/ ACSM4/ ACSS3/ ACTR8/ ACVR1B/ ACVRL1/ ADAMTS20/ ADCY6/ ADIPOR2                     |
| 9D | 14 | 18085723  | 21852647  | 3766924   | 2,62 | Trisomy   | ANG/ APEX1/ C14orf176/ CCNB1P1/ CHD8/ FAM12A/ FAM12B/ FLJ10357/ HNRNPC/ KLHL33/ METT11D1/ METTL3/ MIR1201/ NDRG2/ OR10G2/ OR10G3/ OR11G2/ OR11H12/ OR11H4/ OR11H6  |
| 9D | 14 | 22053238  | 105406903 | 83353665  | 2,64 | Trisomy   | ABCD4/ ABHD12B/ ABHD4/ ACIN1/ ACOT1/ ACOT2/ ACOT4/ ACOT6/ ACTN1/ ACTR10/ ACYP1/ ADAM20/ ADAM21/ ADAM21P/ ADCK1/ ADCY4/ ADSSL1/ AHNAK2/ AHS1/ AK7                   |
| 9D | 17 | 38474392  | 78638431  | 40164039  | 2,64 | Trisomy   | AANAT/ AATK/ ABCA10/ ABCA5/ ABCA6/ ABCA8/ ABCA9/ ABCC3/ ABI3/ ACBD4/ ACE/ ACOX1/ ACSF2/ ACTG1/ ADAM11/ AFMID/ AKAP1/ AMZ2/ ANAPC11/ ANKFN1                         |
| 9D | 18 | 33309     | 76115555  | 76082246  | 3,30 | Tetrasomy | ABHD3/ ACAA2/ ADCYAP1/ ADNP2/ AFG3L2/ ALPK2/ ANKRD12/ ANKRD29/ ANKRD30B/ APCDD1/ AQP4/ ARHGAP28/ ASXL3/ ATP5A1/ ATP8B1/ ATP9B/ B4GALT6/ BCL2/ BRUNOL4/ C18orf1     |
| 9D | 21 | 9758742   | 46942557  | 37183815  | 3,74 | Tetrasomy | ABCC13/ ABCG1/ ADAMTS1/ ADAMTS5/ ADARB1/ AGPAT3/ AIRE/ APP/ ATP5J/ ATP5O/ B3GALT5/ BACE2/ BACH1/ BAGE/ BAGE2/ BAGE3/ BAGE4/ BAGE5/ BRWD1/ BTG3                     |
| 9R | 1  | 143660269 | 150835514 | 7175245   | 3,42 | Tetrasomy | ACP6/ ADAMTSL4/ ANKRD34A/ ANKRD35/ ANP32E/ ANXA9/ APH1A/ ARNT/ BCL9/ BNIPL/ BOLA1/ C1orf230/ C1orf51/ C1orf54/ C1orf56/ C2CD4D/ CA14/ CD160/ CDC42SE1/ CGN         |
| 9R | 1  | 150848459 | 206896849 | 56048390  | 3,42 | Tetrasomy | ABL2/ ACBD6/ ADAM15/ ADAMTS4/ ADAR/ ADCY10/ ADIPOR1/ ADORA1/ AIM2/ ALDH9A1/ ANGPTL1/ ANKRD36BL1/ ANKRD45/ APC5/ APOA1BP/ APOA2/ APOBEC4/ AQP10/ ARHGAP30/ ARHGEF11 |
| 9R | 1  | 206896850 | 244730175 | 37833325  | 3,12 | Trisomy   | ABCB10/ ACBD3/ ACTA1/ ACTN2/ ADSS/ AGT/ AIDA/ AKT3/ ANGEL2/ ARF1/ ARID4B/ ARV1/ ATF3/ AURKAPS1/ B3GALNT2/ BATF3/ BPNT1/ C1orf100/ C1orf101/ C1orf107               |

|    |    |           |           |           |      |           |                                                                                                                                                                                                        |
|----|----|-----------|-----------|-----------|------|-----------|--------------------------------------------------------------------------------------------------------------------------------------------------------------------------------------------------------|
| 9R | 1  | 244730175 | 247249719 | 2519544   | 3,42 | Tetrasomy | AHCTF1/ C1orf150/ C1orf229/ CNST/ LOC148824/ LOC149134/ LOC646627/ NLRP3/ OR11L1/ OR13G1/ OR14A16/ OR14C36/ OR14I1/ OR1C1/ OR2AK2/ OR2B11/ OR2C3/ OR2G2/ OR2G3/ OR2G6                                  |
| 9R | 4  | 506       | 9822874   | 9822368   | 2,63 | Trisomy   | ABCA11P/ ABLIM2/ ACOX3/ ADD1/ ADRA2C/ AFAP1/ ATP5I/ C4orf10/ C4orf23/ C4orf42/ C4orf44/ C4orf48/ C4orf50/ C4orf6/ CCDC96/ CNO/ CPLX1/ CPZ/ CRIPAK/ CRMP1                                               |
| 9R | 4  | 9843736   | 191250146 | 181406410 | 2,68 | Trisomy   | AADAT/ AASDH/ ABCE1/ ABCG2/ ACCN5/ ACSL1/ ADAD1/ ADAM29/ ADAMTS3/ ADH1A/ ADH1B/ ADH1C/ ADH4/ ADH5/ ADH6/ ADH7/ AFF1/ AFM/ AFP/ AGA                                                                     |
| 9R | 5  | 72568     | 95824323  | 95751755  | 3,38 | Tetrasomy | ACOT12/ ACTBL2/ ADAMTS12/ ADAMTS16/ ADAMTS6/ ADCY2/ AGGF1/ AGXT2/ AHRR/ AMACR/ ANKH/ ANKRA2/ ANKRD31/ ANKRD32/ ANKRD33B/ ANKRD34B/ ANKRD55/ AP3B1/ ARL15/ ARRDC3                                       |
| 9R | 5  | 150183011 | 150212275 | 29264     | 0,85 | Deletion  | IRGM                                                                                                                                                                                                   |
| 9R | 6  | 94803     | 170804144 | 170709341 | 2,58 | Trisomy   | AARS2/ ABCC10/ ABCF1/ ABT1/ ACAT2/ ACOT13/ ADAT2/ AGER/ AGPAT1/ AGPAT4/ AHI1/ AIF1/ AIG1/ AIM1/ AKAP12/ AKAP7/ AKD1/ AKIRIN2/ ALDH5A1/ ALDH8A1                                                         |
| 9R | 7  | 52911     | 50158162  | 50105251  | 2,68 | Trisomy   | AAA1/ ABCA13/ ABCB5/ ACTB/ ADAP1/ ADCY1/ ADCYAP1R1/ AEBP1/ AGR2/ AGR3/ AHR/ AIMP2/ AMPH/ AMZ1/ ANKMY2/ ANLN/ AOA/ AQP1/ ARL4A/ AVL9                                                                    |
| 9R | 7  | 50158163  | 50796449  | 638286    | 1,16 | Deletion  | DDC/ FIGLN1/ GRB10/ IKZF1/ region overlaps with 1.84% of C7orf72 / region overlaps with 26.82% of GRB10                                                                                                |
| 9R | 7  | 50796450  | 100426123 | 49629673  | 2,56 | Trisomy   | ABCB1/ ABCB4/ ABHD11/ ACHE/ ACN9/ ACTL6B/ ADAM22/ AGFG2/ AKAP9/ ANKIB1/ AP4M1/ ARPC1A/ ARPC1B/ ASB4/ ASL/ ASNS/ ATP5J2/ AUTS2/ AZGP1/ BAIAP2L1                                                         |
| 9R | 7  | 100459195 | 121576408 | 21117213  | 2,66 | Trisomy   | AASS/ ALKBH4/ ANKRD7/ AP1S1/ ARMC10/ ASZ1/ ATXN7L1/ BCAP29/ C7orf52/ C7orf53/ C7orf58/ C7orf60/ C7orf66/ CAPZA2/ CAV1/ CAV2/ CBL1/ CFTR/ CLDN15/ COG5                                                  |
| 9R | 7  | 134472174 | 145634371 | 11162197  | 2,54 | Trisomy   | ADCK2/ AGK/ AKR1D1/ ARHGEF5/ ARHGEF5L/ ATP6V0A4/ BRAF/ C7orf34/ C7orf49/ C7orf55/ CASP2/ CHRM2/ CLCN1/ CLEC2L/ CLEC5A/ CNOT4/ CREB3L2/ CTAGE4/ CTAGE4/ CTAGE6                                          |
| 9R | 7  | 158389186 | 158413705 | 24519     | 0,96 | Deletion  | contained within WDR60                                                                                                                                                                                 |
| 9R | 7  | 158413705 | 158811019 | 397314    | 2,52 | Trisomy   | LOC154822/ VIPR2/ region overlaps with 4.52% of WDR60                                                                                                                                                  |
| 9R | 8  | 21193     | 146268972 | 146247779 | 2,70 | Trisomy   | ABRA/ ADAM18/ ADAM2/ ADAM28/ ADAM32/ ADAM3A/ ADAM5P/ ADAM7/ ADAM9/ ADAMDEC1/ ADCK5/ ADCY8/ ADHFE1/ ADRA1A/ ADRB3/ AGPAT5/ AGPAT6/ AMAC1L2/ ANGPT1/ ANGPT2                                              |
| 9R | 10 | 67340     | 135355061 | 135287721 | 3,47 | Tetrasomy | A1CF/ ABCC2/ ABI1/ ABLIM1/ ACADSB/ ACBD5/ ACBD7/ ACSL5/ ACTA2/ ACTR1A/ ADAM12/ ADAM8/ ADAMTS14/ ADARB2/ ADD3/ ADK/ ADO/ ADRA2A/ ADRB1/ AFAP1L2                                                         |
| 9R | 11 | 188950    | 1001148   | 812198    | 3,19 | Trisomy   | ANO9/ ATHL1/ B4GALNT4/ BET1L/ C11orf35/ CD151/ CEND1/ CHID1/ DEAF1/ DRD4/ EFCAB4A/ EPS8L2/ HRAS/ IFITM1/ IFITM2/ IFITM3/ IFITM5/ IRF7/ LOC143666/ LRDD                                                 |
| 9R | 11 | 1001149   | 1013051   | 11902     | 1,35 | Deletion  | region overlaps with 85.93% of MUC6 / region overlaps with 9.18% of AP2A2                                                                                                                              |
| 9R | 11 | 1013052   | 1057476   | 44424     | 3,13 | Trisomy   | region overlaps with 30.74% of MUC6                                                                                                                                                                    |
| 9R | 11 | 1057476   | 1081834   | 24358     | 1,14 | Deletion  | region overlaps with 69.63% of MUC2                                                                                                                                                                    |
| 9R | 11 | 1081834   | 1858283   | 776449    | 2,94 | Trisomy   | BRSK2/ CTSD/ DUSP8/ FAM99A/ FAM99B/ HCCA2/ KRTAP5-1/ KRTAP5-2/ KRTAP5-3/ KRTAP5-4/ KRTAP5-5/ KRTAP5-6/ LOC255512/ LOC338651/ LOC402778/ MUC5B/ SYT8/ TNNI2/ TOLLIP/ region overlaps with 1.23% of LSP1 |
| 9R | 11 | 1858283   | 1933454   | 75171     | 1,33 | Deletion  | TNNT3/ region overlaps with 11.14% of MRPL23 / region overlaps with 15.68% of LSP1                                                                                                                     |

|     |    |           |           |           |      |           |                                                                                                                                                                        |
|-----|----|-----------|-----------|-----------|------|-----------|------------------------------------------------------------------------------------------------------------------------------------------------------------------------|
| 9R  | 11 | 1933454   | 5739858   | 3806404   | 2,76 | Trisomy   | ART1/ ART5/ ASCL2/ C11orf21/ C11orf36/ C11orf40/ CARS/ CD81/ CDKN1C/ CHRNA10/ H19/ HBB/ HBBP1/ HBD/ HBE1/ HBG1/ HBG2/ IGF2/ IGF2AS/ INS                                |
| 9R  | 11 | 5755808   | 134449983 | 128694175 | 2,74 | Trisomy   | AASDHPPT/ ABCC8/ ABCG4/ ABTB2/ ACAD8/ ACAT1/ ACCS/ ACCSL/ ACER3/ ACP2/ ACRV1/ ACTN3/ ACY3/ ADAMTS15/ ADAMTS8/ ADM/ ADRBK1/ AGBL2/ AHNAK/ AIP                           |
| 9R  | 12 | 18273667  | 132287719 | 114014052 | 2,68 | Trisomy   | AAAS/ AACS/ ABCB9/ ABCC9/ ABCD2/ ACACB/ ACAD10/ ACADS/ ACCN2/ ACSS3/ ACTR6/ ACVR1B/ ACVRL1/ ADAMTS20/ ADCY6/ AEBP2/ AGAP2/ ALDH1L2/ ALDH2/ ALG10                       |
| 9R  | 14 | 18085723  | 21840336  | 3754613   | 2,71 | Trisomy   | ANG/ APEX1/ C14orf176/ CCNB11P1/ CHD8/ FAM12A/ FAM12B/ FLJ10357/ HNRNPC/ KLHL33/ METT11D1/ METTL3/ MIR1201/ NDRG2/ OR10G2/ OR10G3/ OR11G2/ OR11H12/ OR11H4/ OR11H6     |
| 9R  | 14 | 22053238  | 105406903 | 83353665  | 2,72 | Trisomy   | ABCD4/ ABHD12B/ ABHD4/ ACIN1/ ACOT1/ ACOT2/ ACOT4/ ACOT6/ ACTN1/ ACTR10/ ACYP1/ ADAM20/ ADAM21/ ADAM21P/ ADCK1/ ADCY4/ ADSSL1/ AHNAK2/ AHS1/ AK7                       |
| 9R  | 16 | 18195     | 88799382  | 88781187  | 2,79 | Trisomy   | A2BP1/ AARS/ ABAT/ ABCA17P/ ABCA3/ ABCC1/ ABCC11/ ABCC12/ ABCC6/ ABCC6P1/ ABCC6P2/ ACD/ ACSF3/ ACSM1/ ACSM2A/ ACSM2B/ ACSM3/ ACSM5/ ADAD2/ ADAMTS18                    |
| 9R  | 17 | 38474392  | 78638431  | 40164039  | 3,70 | Tetrasomy | AANAT/ AATK/ ABCA10/ ABCA5/ ABCA6/ ABCA8/ ABCA9/ ABCC3/ ABI3/ ACBD4/ ACE/ ACOX1/ ACSF2/ ACTG1/ ADAM11/ AFMID/ AKAP1/ AMZ2/ ANAPC11/ ANKFN1                             |
| 9R  | 18 | 33309     | 76115555  | 76082246  | 3,44 | Tetrasomy | ABHD3/ ACAA2/ ADCYAP1/ ADNP2/ AFG3L2/ ALPK2/ ANKRD12/ ANKRD29/ ANKRD30B/ APCDD1/ AQP4/ ARHGAP28/ ASXL3/ ATP5A1/ ATP8B1/ ATP9B/ B4GALT6/ BCL2/ BRUNOL4/ C18orf1         |
| 9R  | 21 | 9758742   | 46942557  | 37183815  | 3,50 | Tetrasomy | ABCC13/ ABCG1/ ADAMTS1/ ADAMTS5/ ADARB1/ AGPAT3/ AIRE/ APP/ ATP5J/ ATP5O/ B3GALT5/ BACE2/ BACH1/ BAGE/ BAGE2/ BAGE3/ BAGE4/ BAGE5/ BRWD1/ BTG3                         |
| 10D | 1  | 197277844 | 197320715 | 42871     | 1,00 | Deletion  | region starts 182938 bp after MIR181A1                                                                                                                                 |
| 10D | 5  | 142068673 | 142834682 | 766009    | 1,03 | Deletion  | ARHGAP26/ NR3C1                                                                                                                                                        |
| 10D | 6  | 94661     | 26942880  | 26848219  | 2,56 | Trisomy   | ABT1/ ACOT13/ ALDH5A1/ ATXN1/ BMP6/ BPHL/ BTN1A1/ BTN2A1/ BTN2A2/ BTN2A3/ BTN3A1/ BTN3A2/ BTN3A3/ C6orf105/ C6orf114/ C6orf145/ C6orf146/ C6orf195/ C6orf201/ C6orf218 |
| 10D | 6  | 27075369  | 77494919  | 50419550  | 2,56 | Trisomy   | AARS2/ ABCC10/ ABCF1/ AGER/ AGPAT1/ AIF1/ ANKS1A/ APOBEC2/ APOM/ ATF6B/ ATP6V1G2/ B3GALT4/ B3GAT2/ BAG2/ BAI3/ BAK1/ BAT1/ BAT2/ BAT3/ BAT4                            |
| 10D | 6  | 77509499  | 103858144 | 26348645  | 2,64 | Trisomy   | AKIRIN2/ ANKRD6/ ASCC3/ BACH2/ BCKDHB/ C6orf162/ C6orf163/ C6orf164/ C6orf165/ C6orf167/ C6orf168/ CASP8AP2/ CCNC/ CGA/ CNR1/ COQ3/ CYB5R4/ DOPEY1/ ELOVL4/ EPHA7      |
| 10D | 6  | 103870458 | 170892931 | 67022473  | 2,57 | Trisomy   | ACAT2/ ADAT2/ AGPAT4/ AHI1/ AIG1/ AIM1/ AKAP12/ AKAP7/ AKD1/ ALDH8A1/ AMD1/ ARG1/ ARHGAP18/ ARID1B/ ARMC2/ ASF1A/ ATG5/ BCLAF1/ BEND3/ BET3L                           |
| 10D | 9  | 36985524  | 37337110  | 351586    | 1,03 | Deletion  | region overlaps with 11.08% of PAX5 / region overlaps with 64.46% of ZCCHC7                                                                                            |
| 10D | 10 | 62759     | 111757751 | 111694992 | 2,56 | Trisomy   | A1CF/ ABCC2/ ABI1/ ACBD5/ ACBD7/ ACTA2/ ACTR1A/ ADAMTS14/ ADARB2/ ADK/ ADO/ AGAP11/ AGAP4/ AGAP5/ AGAP6/ AGAP7/ AGAP8/ AIFM2/ AKR1C1/ AKR1C2                           |
| 10D | 10 | 111839840 | 135356695 | 23516855  | 2,55 | Trisomy   | ABLIM1/ ACADSB/ ACSL5/ ADAM12/ ADAM8/ ADRA2A/ ADRB1/ AFAP1L2/ ARMS2/ ATE1/ ATRNL1/ BAG3/ BCCIP/ BNIP3/ BRWD2/ BTBD16/ BUB3/ C10orf118/ C10orf119/ C10orf120            |
| 10D | 14 | 18072112  | 19258878  | 1186766   | 2,50 | Trisomy   | OR11H12/ P704P/ POTE6                                                                                                                                                  |

|     |    |           |           |           |      |            |                                                                                                                                                                     |
|-----|----|-----------|-----------|-----------|------|------------|---------------------------------------------------------------------------------------------------------------------------------------------------------------------|
| 10D | 14 | 19258879  | 21961276  | 2702397   | 3,27 | Tetrasomy  | ANG/ APEX1/ C14orf176/ CCNB1IP1/ CHD8/ FAM12A/ FAM12B/ FLJ10357/ HNRNPC/ KLHL33/ METT11D1/ METTL3/ MIR1201/ NDRG2/ OR10G2/ OR10G3/ OR11G2/ OR11H4/ OR11H6/ OR4E2    |
| 10D | 14 | 21989775  | 105406818 | 83417043  | 3,34 | Tetrasomy  | ABCD4/ ABHD12B/ ABHD4/ ACIN1/ ACOT1/ ACOT2/ ACOT4/ ACOT6/ ACTN1/ ACTR10/ ACYP1/ ADAM20/ ADAM21/ ADAM21P/ ADCK1/ ADCY4/ ADSSL1/ AHNAK2/ AHS1/ AK7                    |
| 10D | 14 | 105406819 | 105487653 | 80834     | 0,98 | Deletion   | KIAA0125                                                                                                                                                            |
| 10D | 18 | 1543      | 76116030  | 76114487  | 3,27 | Tetrasomy  | ABHD3/ ACAA2/ ADCYAP1/ ADNP2/ AFG3L2/ ALPK2/ ANKRD12/ ANKRD29/ ANKRD30B/ APCDD1/ AQP4/ ARHGAP28/ ASXL3/ ATP5A1/ ATP8B1/ ATP9B/ B4GALT6/ BCL2/ BRUNOL4/ C18orf1      |
| 10D | 21 | 9758742   | 13389440  | 3630698   | 2,47 | Trisomy    | BAGE/ BAGE2/ BAGE3/ BAGE4/ BAGE5/ TPTE/ region overlaps with 1.57% of C21orf99                                                                                      |
| 10D | 21 | 13389440  | 46921386  | 33531946  | 3,21 | Tetrasomy  | ABCC13/ ABCG1/ ADAMTS1/ ADAMTS5/ ADARB1/ AGPAT3/ AIRE/ APP/ ATP5J/ ATP5O/ B3GALT5/ BACE2/ BACH1/ BRWD1/ BTG3/ C21orf119/ C21orf121/ C21orf122/ C21orf125/ C21orf128 |
| 10D | 22 | 14432516  | 15257690  | 825174    | 2,30 | Trisomy    | OR11H1/ POTEH                                                                                                                                                       |
| 10R | 1  | 197271511 | 197320131 | 48620     | 1,09 | Deletion   | region starts 176605 bp after MIR181A1                                                                                                                              |
| 10R | 5  | 142068673 | 142834682 | 766009    | 1,06 | Deletion   | ARHGAP26/ NR3C1                                                                                                                                                     |
| 10R | 6  | 94661     | 77493064  | 77398403  | 2,51 | Trisomy    | AARS2/ ABCC10/ ABCF1/ ABT1/ ACOT13/ AGER/ AGPAT1/ AIF1/ ALDH5A1/ ANKS1A/ APOBEC2/ APOM/ ATF6B/ ATP6V1G2/ ATXN1/ B3GALT4/ B3GAT2/ BAG2/ BAI3/ BAK1                   |
| 10R | 6  | 77509499  | 103866278 | 26356779  | 2,56 | Trisomy    | AKIRIN2/ ANKRD6/ ASCC3/ BACH2/ BCKDHB/ C6orf162/ C6orf163/ C6orf164/ C6orf165/ C6orf167/ C6orf168/ CASP8AP2/ CCNC/ CGA/ CNR1/ COQ3/ CYB5R4/ DOPEY1/ ELOVL4/ EPHA7   |
| 10R | 6  | 103868748 | 170892931 | 67024183  | 2,53 | Trisomy    | ACAT2/ ADAT2/ AGPAT4/ AHI1/ AIG1/ AIM1/ AKAP12/ AKAP7/ AKD1/ ALDH8A1/ AMD1/ ARG1/ ARHGAP18/ ARID1B/ ARMC2/ ASF1A/ ATG5/ BCLAF1/ BEND3/ BET3L                        |
| 10R | 9  | 7777870   | 8959700   | 1181830   | 1,09 | Deletion   | C9orf123/ PTPRD/ region overlaps with 55.46% of PTPRD                                                                                                               |
| 10R | 9  | 19773917  | 21032556  | 1258639   | 1,08 | Deletion   | KIAA1797/ MIR491/ MLLT3/ PTPLAD2/ region overlaps with 0.24% of SLC24A2                                                                                             |
| 10R | 9  | 21032557  | 22055290  | 1022733   | 0,40 | biDeletion | C9orf53/ CDKN2A/ CDKN2B/ IFNA1/ IFNA10/ IFNA13/ IFNA14/ IFNA16/ IFNA17/ IFNA2/ IFNA21/ IFNA4/ IFNA5/ IFNA6/ IFNA7/ IFNA8/ IFNB1/ IFNE/ IFNW1/ KLHL9                 |
| 10R | 9  | 22055291  | 22525826  | 470535    | 1,08 | Deletion   | DMRTA1/ region overlaps with 11.86% of CDKN2BAS                                                                                                                     |
| 10R | 9  | 36985524  | 37337110  | 351586    | 1,03 | Deletion   | region overlaps with 11.08% of PAX5 / region overlaps with 64.46% of ZCCHC7                                                                                         |
| 10R | 10 | 62759     | 111757751 | 111694992 | 2,56 | Trisomy    | A1CF/ ABCC2/ ABI1/ ACBD5/ ACBD7/ ACTA2/ ACTR1A/ ADAMTS14/ ADARB2/ ADK/ ADO/ AGAP11/ AGAP4/ AGAP5/ AGAP6/ AGAP7/ AGAP8/ AIFM2/ AKR1C1/ AKR1C2                        |
| 10R | 10 | 111839840 | 135356695 | 23516855  | 2,55 | Trisomy    | ABLIM1/ ACADSB/ ACSL5/ ADAM12/ ADAM8/ ADRA2A/ ADRB1/ AFAP1L2/ ARMS2/ ATE1/ ATRNL1/ BAG3/ BCCIP/ BNIP3/ BRWD2/ BTBD16/ BUB3/ C10orf118/ C10orf119/ C10orf120         |
| 10R | 11 | 36576711  | 36596381  | 19670     | 1,09 | Deletion   | contained within C11orf74                                                                                                                                           |
| 10R | 14 | 18072112  | 19258878  | 1186766   | 2,50 | Trisomy    | OR11H12/ P704P/ POTEH                                                                                                                                               |
| 10R | 14 | 19258879  | 21961276  | 2702397   | 3,27 | Tetrasomy  | ANG/ APEX1/ C14orf176/ CCNB1IP1/ CHD8/ FAM12A/ FAM12B/ FLJ10357/ HNRNPC/ KLHL33/ METT11D1/ METTL3/ MIR1201/ NDRG2/ OR10G2/ OR10G3/ OR11G2/ OR11H4/ OR11H6/ OR4E2    |
| 10R | 14 | 21989775  | 105406818 | 83417043  | 3,21 | Tetrasomy  | ABCD4/ ABHD12B/ ABHD4/ ACIN1/ ACOT1/ ACOT2/ ACOT4/ ACOT6/ ACTN1/ ACTR10/ ACYP1/ ADAM20/ ADAM21/ ADAM21P/ ADCK1/ ADCY4/ ADSSL1/ AHNAK2/ AHS1/ AK7                    |

|     |    |           |           |           |      |           |                                                                                                                                                                     |
|-----|----|-----------|-----------|-----------|------|-----------|---------------------------------------------------------------------------------------------------------------------------------------------------------------------|
| 10R | 14 | 105406819 | 105487653 | 80834     | 0,98 | Deletion  | KIAA0125                                                                                                                                                            |
| 10R | 18 | 1543      | 76116030  | 76114487  | 3,27 | Tetrasomy | ABHD3/ ACAA2/ ADCYAP1/ ADNP2/ AFG3L2/ ALPK2/ ANKRD12/ ANKRD29/ ANKRD30B/ APCDD1/ AQP4/ ARHGAP28/ ASXL3/ ATP5A1/ ATP8B1/ ATP9B/ B4GALT6/ BCL2/ BRUNOL4/ C18orf1      |
| 10R | 21 | 9758742   | 13363622  | 3604880   | 2,42 | Trisomy   | BAGE/ BAGE2/ BAGE3/ BAGE4/ BAGE5/ TPTE/ region overlaps with 0.87% of C21orf99                                                                                      |
| 10R | 21 | 13363622  | 46921386  | 33557764  | 3,18 | Tetrasomy | ABCC13/ ABCG1/ ADAMTS1/ ADAMTS5/ ADARB1/ AGPAT3/ AIRE/ APP/ ATP5J/ ATP5O/ B3GALT5/ BACE2/ BACH1/ BRWD1/ BTG3/ C21orf119/ C21orf121/ C21orf122/ C21orf125/ C21orf128 |
| 10R | 22 | 14432516  | 15257690  | 825174    | 2,30 | Trisomy   | OR11H1/ POTEH                                                                                                                                                       |
| 11D | 3  | 44798693  | 45011564  | 212871    | 1,03 | Deletion  | MIR564/ TGM4/ TMEM42/ ZDHHC3/ region overlaps with 33.38% of KIF15 / region overlaps with 8.84% of EXOSC7                                                           |
| 11D | 4  | 506       | 191250146 | 191249640 | 2,56 | Trisomy   | AADAT/ AASDH/ ABCA11P/ ABCE1/ ABCG2/ ABLIM2/ ACCN5/ ACOX3/ ACSL1/ ADAD1/ ADAM29/ ADAMTS3/ ADD1/ ADH1A/ ADH1B/ ADH1C/ ADH4/ ADH5/ ADH6/ ADH7                         |
| 11D | 6  | 94803     | 170804144 | 170709341 | 2,63 | Trisomy   | AARS2/ ABCC10/ ABCF1/ ABT1/ ACAT2/ ACOT13/ ADAT2/ AGER/ AGPAT1/ AGPAT4/ AHI1/ AIF1/ AIG1/ AIM1/ AKAP12/ AKAP7/ AKD1/ AKIRIN2/ ALDH5A1/ ALDH8A1                      |
| 11D | 10 | 67340     | 135355061 | 135287721 | 2,77 | Trisomy   | A1CF/ ABCC2/ ABI1/ ABLIM1/ ACADSB/ ACBD5/ ACBD7/ ACSL5/ ACTA2/ ACTR1A/ ADAM12/ ADAM8/ ADAMTS14/ ADARB2/ ADD3/ ADK/ ADO/ ADRA2A/ ADRB1/ AFAP1L2                      |
| 11D | 12 | 9021395   | 10596730  | 1575335   | 1,28 | Deletion  | A2M/ C12orf59/ CD69/ CLEC12A/ CLEC12B/ CLEC1A/ CLEC1B/ CLEC2A/ CLEC2B/ CLEC2D/ CLEC7A/ CLEC9A/ CLECL1/ DDX12/ GABARAPL1/ KLRB1/ KLRC1/ KLRC2/ KLRC3/ KLRC4          |
| 11D | 12 | 11756966  | 15425887  | 3668921   | 1,27 | Deletion  | APOLD1/ ARHGDI1B/ ART4/ ATF7IP/ BCL2L14/ C12orf36/ C12orf60/ C12orf69/ CDKN1B/ CREBL2/ DDX47/ DUSP16/ EMP1/ ERP27/ GPR19/ GPRC5A/ GPRC5D/ GRIN2B/ GSG1/ GUCY2C      |
| 11D | 14 | 18085723  | 105406903 | 87321180  | 2,77 | Trisomy   | ABCD4/ ABHD12B/ ABHD4/ ACIN1/ ACOT1/ ACOT2/ ACOT4/ ACOT6/ ACTN1/ ACTR10/ ACYP1/ ADAM20/ ADAM21/ ADAM21P/ ADCK1/ ADCY4/ ADSSL1/ AHNAK2/ AHS1/ AK7                    |
| 11D | 17 | 6888      | 21390540  | 21383652  | 1,27 | Deletion  | ABR/ ACADVL/ ACAP1/ ADORA2B/ AIPL1/ AKAP10/ ALDH3A1/ ALDH3A2/ ALKBH5/ ALOX12/ ALOX12B/ ALOX12P2/ ALOX15/ ALOX15B/ ALOXE3/ AMAC1L3/ ANKFY1/ ARHGEF15/ ARRB2/ ASGR1   |
| 11D | 17 | 21390540  | 78638431  | 57247891  | 2,81 | Trisomy   | AANAT/ AARSD1/ AATF/ AATK/ ABCA10/ ABCA5/ ABCA6/ ABCA8/ ABCA9/ ABCC3/ ABHD15/ ABI3/ ACACA/ ACBD4/ ACCN1/ ACE/ ACRY/ ACOX1/ ACSF2/ ACTG1                             |
| 11D | 18 | 33309     | 76115555  | 76082246  | 2,73 | Trisomy   | ABHD3/ ACAA2/ ADCYAP1/ ADNP2/ AFG3L2/ ALPK2/ ANKRD12/ ANKRD29/ ANKRD30B/ APCDD1/ AQP4/ ARHGAP28/ ASXL3/ ATP5A1/ ATP8B1/ ATP9B/ B4GALT6/ BCL2/ BRUNOL4/ C18orf1      |
| 11D | 20 | 39744929  | 62426743  | 22681814  | 1,26 | Deletion  | ACOT8/ ADA/ ADNP/ ADRM1/ APCDD1L/ ARFGAP1/ ARFGEF2/ ARFRP1/ ATP5E/ ATP9A/ AURKA/ B4GALT5/ BCAS1/ BCAS4/ BHLHE23/ BIRC7/ BMP7/ C20orf106/ C20orf107/ C20orf108       |
| 11D | 21 | 9758742   | 46942557  | 37183815  | 3,00 | Tetrasomy | ABCC13/ ABCG1/ ADAMTS1/ ADAMTS5/ ADARB1/ AGPAT3/ AIRE/ APP/ ATP5J/ ATP5O/ B3GALT5/ BACE2/ BACH1/ BAGE/ BAGE2/ BAGE3/ BAGE4/ BAGE5/ BRWD1/ BTG3                      |
| 11R | 3  | 44798693  | 45011564  | 212871    | 1,20 | Deletion  | MIR564/ TGM4/ TMEM42/ ZDHHC3/ region overlaps with 33.38% of KIF15 / region overlaps with 8.84% of EXOSC7                                                           |
| 11R | 4  | 506       | 191250146 | 191249640 | 2,65 | Trisomy   | AADAT/ AASDH/ ABCA11P/ ABCE1/ ABCG2/ ABLIM2/ ACCN5/ ACOX3/ ACSL1/ ADAD1/ ADAM29/ ADAMTS3/ ADD1/ ADH1A/ ADH1B/ ADH1C/ ADH4/ ADH5/ ADH6/ ADH7                         |

|     |    |           |           |           |      |           |                                                                                                                                                                             |
|-----|----|-----------|-----------|-----------|------|-----------|-----------------------------------------------------------------------------------------------------------------------------------------------------------------------------|
| 11R | 6  | 94803     | 170804144 | 170709341 | 2,68 | Trisomy   | AARS2/ ABCC10/ ABCF1/ ABT1/ ACAT2/ ACOT13/ ADAT2/ AGER/ AGPAT1/ AGPAT4/ AHI1/ AIF1/ AIG1/ AIM1/ AKAP12/ AKAP7/ AKD1/ AKIRIN2/ ALDH5A1/ ALDH8A1                              |
| 11R | 8  | 21193     | 146268972 | 146247779 | 2,70 | Trisomy   | ABRA/ ADAM18/ ADAM2/ ADAM28/ ADAM32/ ADAM3A/ ADAM5P/ ADAM7/ ADAM9/ ADAMDEC1/ ADCK5/ ADCY8/ ADHFE1/ ADRA1A/ ADRB3/ AGPAT5/ AGPAT6/ AMAC1L2/ ANGPT1/ ANGPT2                   |
| 11R | 9  | 40463     | 36876147  | 36835684  | 1,21 | Deletion  | ACER2/ ACO1/ ADAMTSL1/ AK3/ ANXA2P2/ APTX/ AQP3/ AQP7/ ARID3C/ B4GALT1/ BAG1/ BNC2/ C9orf100/ C9orf11/ C9orf123/ C9orf128/ C9orf131/ C9orf144/ C9orf144B/ C9orf150          |
| 11R | 10 | 67340     | 135355061 | 135287721 | 2,77 | Trisomy   | A1CF/ ABCC2/ ABI1/ ABLIM1/ ACADSB/ ACBD5/ ACBD7/ ACSL5/ ACTA2/ ACTR1A/ ADAM12/ ADAM8/ ADAMTS14/ ADARB2/ ADD3/ ADK/ ADO/ ADRA2A/ ADRB1/ AFAP1L2                              |
| 11R | 12 | 9021395   | 10596730  | 1575335   | 1,30 | Deletion  | A2M/ C12orf59/ CD69/ CLEC12A/ CLEC12B/ CLEC1A/ CLEC1B/ CLEC2A/ CLEC2B/ CLEC2D/ CLEC7A/ CLEC9A/ CLECL1/ DDX12/ GABARAPL1/ KLRB1/ KLRC1/ KLRC2/ KLRC3/ KLRC4                  |
| 11R | 12 | 11767899  | 15425887  | 3657988   | 1,27 | Deletion  | APOLD1/ ARHGDI1B/ ART4/ ATF7IP/ BCL2L14/ C12orf36/ C12orf60/ C12orf69/ CDKN1B/ CREBL2/ DDX47/ DUSP16/ EMP1/ ERP27/ GPR19/ GPRC5A/ GPRC5D/ GRIN2B/ GSG1/ GUCY2C              |
| 11R | 14 | 18085723  | 44525738  | 26440015  | 2,77 | Trisomy   | ABHD4/ ACIN1/ ADCY4/ AKAP6/ ANG/ AP1G2/ AP4S1/ APEX1/ ARHGAP5/ BAZ1A/ BCL2L2/ BRMS1L/ C14orf119/ C14orf126/ C14orf128/ C14orf147/ C14orf165/ C14orf167/ C14orf176/ C14orf19 |
| 11R | 17 | 17691901  | 21390540  | 3698639   | 1,38 | Deletion  | AKAP10/ ALDH3A1/ ALDH3A2/ ALKBH5/ ATPAF2/ B9D1/ C17orf103/ C17orf39/ CCDC144B/ CCDC144C/ CCDC144NL/ CYTSB/ DHRS7B/ DRG2/ EPN2/ EVPLL/ FAM106A/ FAM18B/ FAM83G/ FBXW10       |
| 11R | 17 | 21390540  | 22319718  | 929178    | 2,74 | Trisomy   | FAM27L/ FLJ36000/ region overlaps with 0.54% of C17orf51                                                                                                                    |
| 11R | 17 | 26014654  | 78638431  | 52623777  | 2,74 | Trisomy   | AANAT/ AARSD1/ AATF/ AATK/ ABCA10/ ABCA5/ ABCA6/ ABCA8/ ABCA9/ ABC3/ ABI3/ ACACA/ ACBD4/ ACCN1/ ACE/ ACLY/ ACOX1/ ACSF2/ ACTG1/ ADAM11                                      |
| 11R | 20 | 39754501  | 62426743  | 22672242  | 1,30 | Deletion  | ACOT8/ ADA/ ADNP/ ADRM1/ APCDD1L/ ARFGAP1/ ARFGEF2/ ARFRP1/ ATP5E/ ATP9A/ AURKA/ B4GALT5/ BCAS1/ BCAS4/ BHLHE23/ BIRC7/ BMP7/ C20orf106/ C20orf107/ C20orf108               |
| 11R | 21 | 9758742   | 46942557  | 37183815  | 2,98 | Tetrasomy | ABCC13/ ABCG1/ ADAMTS1/ ADAMTS5/ ADARB1/ AGPAT3/ AIRE/ APP/ ATP5J/ ATP5O/ B3GALT5/ BACE2/ BACH1/ BAGE/ BAGE2/ BAGE3/ BAGE4/ BAGE5/ BRWD1/ BTG3                              |
| 12D | 1  | 143802694 | 150822046 | 7019352   | 2,77 | Trisomy   | ACP6/ ADAMTSL4/ ANKRD34A/ ANKRD35/ ANP32E/ ANXA9/ APH1A/ ARNT/ BCL9/ BNIPL/ BOLA1/ C1orf230/ C1orf51/ C1orf54/ C1orf56/ C2CD4D/ CA14/ CD160/ CDC42SE1/ CGN                  |
| 12D | 1  | 150848459 | 229855886 | 79007427  | 2,52 | Trisomy   | ABCB10/ ABL2/ ACBD3/ ACBD6/ ACTA1/ ADAM15/ ADAMTS4/ ADAR/ ADCY10/ ADIPOR1/ ADORA1/ AGT/ AIDA/ AIM2/ ALDH9A1/ ANGEL2/ ANGPTL1/ ANKRD36BL1/ ANKRD45/ APCS                     |
| 12D | 2  | 201057686 | 201250181 | 192495    | 1,14 | Deletion  | AOX1/ KCTD18/ SGOL2                                                                                                                                                         |
| 12D | 4  | 506       | 9822874   | 9822368   | 2,85 | Trisomy   | ABCA11P/ ABLIM2/ ACOX3/ ADD1/ ADRA2C/ AFAP1/ ATP5I/ C4orf10/ C4orf23/ C4orf42/ C4orf44/ C4orf48/ C4orf50/ C4orf6/ CCDC96/ CNO/ CPLX1/ CPZ/ CRIPAK/ CRMP1                    |
| 12D | 4  | 9843736   | 191250146 | 181406410 | 2,68 | Trisomy   | AADAT/ AASDH/ ABCE1/ ABCG2/ ACCN5/ ACSL1/ ADAD1/ ADAM29/ ADAMTS3/ ADH1A/ ADH1B/ ADH1C/ ADH4/ ADH5/ ADH6/ ADH7/ AFF1/ AFM/ AFP/ AGA                                          |
| 12D | 6  | 94803     | 28015395  | 27920592  | 2,81 | Trisomy   | ABT1/ ACOT13/ ALDH5A1/ ATXN1/ BMP6/ BPHL/ BTN1A1/ BTN2A1/ BTN2A2/ BTN2A3/ BTN3A1/ BTN3A2/ BTN3A3/ C6orf105/ C6orf114/ C6orf145/ C6orf146/ C6orf195/ C6orf201/ C6orf218      |

|     |    |           |           |           |      |           |                                                                                                                                                                                       |
|-----|----|-----------|-----------|-----------|------|-----------|---------------------------------------------------------------------------------------------------------------------------------------------------------------------------------------|
| 12D | 6  | 28063192  | 170804144 | 142740952 | 2,71 | Trisomy   | AARS2/ ABCC10/ ABCF1/ ACAT2/ ADAT2/ AGER/ AGPAT1/ AGPAT4/ AHI1/ AIF1/ AIG1/ AIM1/ AKAP12/ AKAP7/ AKD1/ AKIRIN2/ ALDH8A1/ AMD1/ ANKRD6/ ANKS1A                                         |
| 12D | 8  | 21193     | 146268972 | 146247779 | 2,77 | Trisomy   | ABRA/ ADAM18/ ADAM2/ ADAM28/ ADAM32/ ADAM3A/ ADAM5P/ ADAM7/ ADAM9/ ADAMDEC1/ ADCK5/ ADCY8/ ADHFE1/ ADRA1A/ ADRB3/ AGPAT5/ AGPAT6/ AMAC1L2/ ANGPT1/ ANGPT2                             |
| 12D | 10 | 67340     | 135355061 | 135287721 | 3,57 | Tetrasomy | A1CF/ ABCC2/ ABI1/ ABLIM1/ ACADSB/ ACBD5/ ACBD7/ ACSL5/ ACTA2/ ACTR1A/ ADAM12/ ADAM8/ ADAMTS14/ ADARB2/ ADD3/ ADK/ ADO/ ADRA2A/ ADRB1/ AFAP1L2                                        |
| 12D | 11 | 188950    | 55171902  | 54982952  | 2,74 | Trisomy   | ABCC8/ ABTB2/ ACCS/ ACCSL/ ACP2/ ADM/ AGBL2/ ALKBH3/ ALX4/ AMBRA1/ AMPD3/ ANO3/ ANO5/ ANO9/ AP2A2/ APBB1/ API5/ APIP/ ARFGAP2/ ARFIP2                                                 |
| 12D | 11 | 55209299  | 127540639 | 72331340  | 2,77 | Trisomy   | AASDHPT/ ABCG4/ ACAT1/ ACER3/ ACRV1/ ACTN3/ ACY3/ ADRBK1/ AHNAK/ AIP/ ALDH3B1/ ALDH3B2/ ALG8/ ALG9/ ALKBH8/ AMICA1/ AMOTL1/ ANGPTL5/ ANKK1/ ANKRD13D                                  |
| 12D | 11 | 127540639 | 128572728 | 1032089   | 3,64 | Tetrasomy | C11orf45/ ETS1/ FLI1/ KCNJ1/ KCNJ5/ RICS/ TP53AIP1                                                                                                                                    |
| 12D | 11 | 128624192 | 134449983 | 5825791   | 2,84 | Trisomy   | ACAD8/ ADAMTS15/ ADAMTS8/ APLP2/ B3GAT1/ BARX2/ GLB1L2/ GLB1L3/ IGSF9B/ JAM3/ LOC100128239/ LOC283174/ NCAPD3/ NCRNA00167/ NFRKB/ NTM/ OPCML/ PRDM10/ SNX19/ SPATA19                  |
| 12D | 12 | 20703     | 16739965  | 16719262  | 1,26 | Deletion  | A2M/ A2ML1/ ACRBP/ ACSM4/ ADIPOR2/ AICDA/ AKAP3/ ANO2/ APOBEC1/ APOLD1/ ARHGDI/ ART4/ ATF7IP/ ATN1/ B4GALNT3/ BCL2L14/ C12orf32/ C12orf36/ C12orf4/ C12orf5                           |
| 12D | 14 | 18085723  | 105390903 | 87305180  | 3,54 | Tetrasomy | ABCD4/ ABHD12B/ ABHD4/ ACIN1/ ACOT1/ ACOT2/ ACOT4/ ACOT6/ ACTN1/ ACTR10/ ACYP1/ ADAM20/ ADAM21/ ADAM21P/ ADCK1/ ADCY4/ ADSSL1/ AHNAK2/ AHS1/ AK7                                      |
| 12D | 16 | 3167278   | 4002029   | 834751    | 1,28 | Deletion  | BTBD12/ C16orf90/ CLUAP1/ CREBBP/ DNASE1/ MEFV/ NAT15/ NLRC3/ OR1F1/ OR1F2P/ OR2C1/ TIGD7/ TRAP1/ ZNF174/ ZNF200/ ZNF263/ ZNF434/ ZNF597/ ZNF75A/ region overlaps with 5.92% of ADCY9 |
| 12D | 17 | 38659218  | 78638431  | 39979213  | 2,79 | Trisomy   | AANAT/ AATK/ ABCA10/ ABCA5/ ABCA6/ ABCA8/ ABCA9/ ABCC3/ ABI3/ ACBD4/ ACE/ ACOX1/ ACSF2/ ACTG1/ ADAM11/ AFMID/ AKAP1/ AMZ2/ ANAPC11/ ANKFN1                                            |
| 12D | 18 | 33309     | 76115555  | 76082246  | 2,76 | Trisomy   | ABHD3/ ACAA2/ ADCYAP1/ ADNP2/ AFG3L2/ ALPK2/ ANKRD12/ ANKRD29/ ANKRD30B/ APCDD1/ AQP4/ ARHGAP28/ ASXL3/ ATP5A1/ ATP8B1/ ATP9B/ B4GALT6/ BCL2/ BRUNOL4/ C18orf1                        |
| 12D | 21 | 9758742   | 46942557  | 37183815  | 3,61 | Tetrasomy | ABCC13/ ABCG1/ ADAMTS1/ ADAMTS5/ ADARB1/ AGPAT3/ AIRE/ APP/ ATP5J/ ATP5O/ B3GALT5/ BACE2/ BACH1/ BAGE/ BAGE2/ BAGE3/ BAGE4/ BAGE5/ BRWD1/ BTG3                                        |
| 12R | 1  | 143802694 | 150822046 | 7019352   | 2,73 | Trisomy   | ACP6/ ADAMTSL4/ ANKRD34A/ ANKRD35/ ANP32E/ ANXA9/ APH1A/ ARNT/ BCL9/ BNIPL/ BOLA1/ C1orf230/ C1orf51/ C1orf54/ C1orf56/ C2CD4D/ CA14/ CD160/ CDC42SE1/ CGN                            |
| 12R | 1  | 150848459 | 185002386 | 34153927  | 2,67 | Trisomy   | ABL2/ ACBD6/ ADAM15/ ADAMTS4/ ADAR/ ADCY10/ AIM2/ ALDH9A1/ ANGPTL1/ ANKRD36BL1/ ANKRD45/ APC5/ APOA1BP/ APOA2/ APOBEC4/ AQP10/ ARHGAP30/ ARHGEF11/ ARHGEF2/ ARPC5                     |
| 12R | 1  | 187637333 | 205798568 | 18161235  | 2,67 | Trisomy   | ADIPOR1/ ADORA1/ ARL8A/ ASPM/ ATP2B4/ ATP6V1G3/ AVPR1B/ B3GALT2/ BTG2/ C1orf106/ C1orf116/ C1orf157/ C1orf186/ C1orf53/ C4BPA/ C4BPB/ CACNA1S/ CAMSAP1L1/ CD55/ CDC73                 |
| 12R | 4  | 506       | 9822874   | 9822368   | 2,85 | Trisomy   | ABCA11P/ ABLIM2/ ACOX3/ ADD1/ ADRA2C/ AFAP1/ ATP5I/ C4orf10/ C4orf23/ C4orf42/ C4orf44/ C4orf48/ C4orf50/ C4orf6/ CCDC96/ CNO/ CPLX1/ CPZ/ CRIPAK/ CRMP1                              |
| 12R | 4  | 9843736   | 191250146 | 181406410 | 2,68 | Trisomy   | AADAT/ AASDH/ ABCE1/ ABCG2/ ACCN5/ ACSL1/ ADAD1/ ADAM29/ ADAMTS3/ ADH1A/ ADH1B/ ADH1C/ ADH4/ ADH5/ ADH6/ ADH7/ AFF1/ AFM/ AFP/ AGA                                                    |

|     |    |           |           |           |      |           |                                                                                                                                                                                   |
|-----|----|-----------|-----------|-----------|------|-----------|-----------------------------------------------------------------------------------------------------------------------------------------------------------------------------------|
| 12R | 5  | 172298378 | 180668700 | 8370322   | 2,72 | Trisomy   | AACSL/ ADAMTS2/ AGXT2L2/ ARL10/ ATP6V0E1/ B4GALT7/ BNIP1/ BOD1/ BTNL3/ BTNL8/ BTNL9/ C5orf25/ C5orf41/ C5orf45/ C5orf47/ C5orf60/ CANX/ CBY3/ CLK4/ CLTB                          |
| 12R | 6  | 94803     | 28015395  | 27920592  | 2,75 | Trisomy   | ABT1/ ACOT13/ ALDH5A1/ ATXN1/ BMP6/ BPHL/ BTN1A1/ BTN2A1/ BTN2A2/ BTN2A3/ BTN3A1/ BTN3A2/ BTN3A3/ C6orf105/ C6orf114/ C6orf145/ C6orf146/ C6orf195/ C6orf201/ C6orf218            |
| 12R | 6  | 28063192  | 170804144 | 142740952 | 2,69 | Trisomy   | AARS2/ ABCC10/ ABCF1/ ACAT2/ ADAT2/ AGER/ AGPAT1/ AGPAT4/ AHI1/ AIF1/ AIG1/ AIM1/ AKAP12/ AKAP7/ AKD1/ AKIRIN2/ ALDH8A1/ AMD1/ ANKRD6/ ANKS1A                                     |
| 12R | 8  | 21193     | 146268972 | 146247779 | 2,74 | Trisomy   | ABRA/ ADAM18/ ADAM2/ ADAM28/ ADAM32/ ADAM3A/ ADAM5P/ ADAM7/ ADAM9/ ADAMDEC1/ ADCK5/ ADCY8/ ADHFE1/ ADRA1A/ ADRB3/ AGPAT5/ AGPAT6/ AMAC1L2/ ANGPT1/ ANGPT2                         |
| 12R | 9  | 40463     | 140185942 | 140145479 | 2,41 | Trisomy   | ABCA1/ ABCA2/ ABL1/ ABO/ ACER2/ ACO1/ ACTL7A/ ACTL7B/ ADAMTS13/ ADAMTSL1/ ADAMTSL2/ AGPAT2/ AGTPBP1/ AIF1L/ AK1/ AK3/ AKAP2/ AKNA/ ALAD/ ALDH1A1                                  |
| 12R | 10 | 67340     | 135355061 | 135287721 | 3,23 | Tetrasomy | A1CF/ ABCC2/ ABI1/ ABLIM1/ ACADSB/ ACBD5/ ACBD7/ ACSL5/ ACTA2/ ACTR1A/ ADAM12/ ADAM8/ ADAMTS14/ ADARB2/ ADD3/ ADK/ ADO/ ADRA2A/ ADRB1/ AFAP1L2                                    |
| 12R | 11 | 188950    | 55135376  | 54946426  | 2,71 | Trisomy   | ABCC8/ ABTB2/ ACCS/ ACCSL/ ACP2/ ADM/ AGBL2/ ALKBH3/ ALX4/ AMBRA1/ AMPD3/ ANO3/ ANO5/ ANO9/ AP2A2/ APBB1/ API5/ APIP/ ARFGAP2/ ARFIP2                                             |
| 12R | 11 | 55236974  | 134449983 | 79213009  | 2,74 | Trisomy   | AASDHPT/ ABCG4/ ACAD8/ ACAT1/ ACER3/ ACRV1/ ACTN3/ ACY3/ ADAMTS15/ ADAMTS8/ ADRBK1/ AHNAK/ AIP/ ALDH3B1/ ALDH3B2/ ALG8/ ALG9/ ALKBH8/ AMICA1/ AMOTL1                              |
| 12R | 14 | 18085723  | 105406903 | 87321180  | 3,48 | Tetrasomy | ABCD4/ ABHD12B/ ABHD4/ ACIN1/ ACOT1/ ACOT2/ ACOT4/ ACOT6/ ACTN1/ ACTR10/ ACYP1/ ADAM20/ ADAM21/ ADAM21P/ ADCK1/ ADCY4/ ADSSL1/ AHNAK2/ AHSAA1/ AK7                                |
| 12R | 17 | 38659218  | 78638431  | 39979213  | 2,76 | Trisomy   | AANAT/ AATK/ ABCA10/ ABCA5/ ABCA6/ ABCA8/ ABCA9/ ABCC3/ ABI3/ ACBD4/ ACE/ ACOX1/ ACSF2/ ACTG1/ ADAM11/ AFMID/ AKAP1/ AMZ2/ ANAPC11/ ANKFN1                                        |
| 12R | 18 | 33309     | 31311692  | 31278383  | 2,72 | Trisomy   | ABHD3/ ADCYAP1/ AFG3L2/ ANKRD12/ ANKRD29/ ANKRD30B/ APCDD1/ AQP4/ ARHGAP28/ ASXL3/ B4GALT6/ C18orf1/ C18orf16/ C18orf18/ C18orf19/ C18orf2/ C18orf34/ C18orf45/ C18orf56/ C18orf8 |
| 12R | 21 | 9758742   | 46942557  | 37183815  | 3,47 | Tetrasomy | ABCC13/ ABCG1/ ADAMTS1/ ADAMTS5/ ADARB1/ AGPAT3/ AIRE/ APP/ ATP5J/ ATP5O/ B3GALT5/ BACE2/ BACH1/ BAGE/ BAGE2/ BAGE3/ BAGE4/ BAGE5/ BRWD1/ BTG3                                    |
| 13D | 1  | 143604249 | 144092506 | 488257    | 2,78 | Trisomy   | NBPF10/ NOTCH2NL/ PDE4DIP/ SEC22B/ region overlaps with 20.92% of PDE4DIP / region overlaps with 8.02% of PDE4DIP                                                                 |
| 13D | 1  | 144690441 | 203560506 | 58870065  | 2,78 | Trisomy   | ABL2/ ACBD6/ ACP6/ ADAM15/ ADAMTS4/ ADAMTSL4/ ADAR/ ADCY10/ ADIPOR1/ ADORA1/ AIM2/ ALDH9A1/ ANGPTL1/ ANKRD36BL1/ ANKRD45/ ANP32E/ ANXA9/ APCS/ APH1A/ APOA1BP                     |
| 13D | 4  | 19099     | 191167889 | 191148790 | 2,94 | Trisomy   | AADAT/ AASDH/ ABCA11P/ ABCE1/ ABCG2/ ABLIM2/ ACCN5/ ACOX3/ ACSL1/ ADAD1/ ADAM29/ ADAMTS3/ ADD1/ ADH1A/ ADH1B/ ADH1C/ ADH4/ ADH5/ ADH6/ ADH7                                       |
| 13D | 6  | 110391    | 170747903 | 170637512 | 2,91 | Trisomy   | AARS2/ ABCC10/ ABCF1/ ABT1/ ACAT2/ ACOT13/ ADAT2/ AGER/ AGPAT1/ AGPAT4/ AHI1/ AIF1/ AIG1/ AIM1/ AKAP12/ AKAP7/ AKD1/ AKIRIN2/ ALDH5A1/ ALDH8A1                                    |
| 13D | 9  | 36431     | 36918706  | 36882275  | 2,83 | Trisomy   | ACER2/ ACO1/ ADAMTSL1/ AK3/ ANXA2P2/ APTX/ AQP3/ AQP7/ ARID3C/ B4GALT1/ BAG1/ BNC2/ C9orf100/ C9orf11/ C9orf123/ C9orf128/ C9orf131/ C9orf144/ C9orf144B/ C9orf150                |



|     |    |           |           |           |      |           |                                                                                                                                                                                    |
|-----|----|-----------|-----------|-----------|------|-----------|------------------------------------------------------------------------------------------------------------------------------------------------------------------------------------|
| 13D | 9  | 37071806  | 122818897 | 85747091  | 2,82 | Trisomy   | ABCA1/ ACTL7A/ ACTL7B/ AGTPBP1/ AKAP2/ AKNA/ ALAD/ ALDH1A1/ ALDH1B1/ ALDOB/ ALG2/ AMBP/ ANKRD18A/ ANKRD19/ ANKRD20A1/ ANKRD20A2/ ANKRD20A2/ ANKRD20A3/ ANKRD20A3/ ANKRD20A4        |
| 13D | 9  | 122916922 | 140207188 | 17290266  | 2,73 | Trisomy   | ABCA2/ ABL1/ ABO/ ADAMTS13/ ADAMTSL2/ AGPAT2/ AIF1L/ AK1/ ANAPC2/ ANGPTL2/ ARPC5L/ ARRDC1/ ASB6/ ASS1/ BARHL1/ BAT2L1/ BRD3/ C8G/ C9orf106/ C9orf114                               |
| 13D | 10 | 101955    | 135284542 | 135182587 | 2,88 | Trisomy   | A1CF/ ABCC2/ ABI1/ ABLIM1/ ACADSB/ ACBD5/ ACBD7/ ACSL5/ ACTA2/ ACTR1A/ ADAM12/ ADAM8/ ADAMTS14/ ADARB2/ ADD3/ ADK/ ADO/ ADRA2A/ ADRB1/ AFAP1L2                                     |
| 13D | 16 | 26671     | 2355811   | 2329140   | 1,17 | Deletion  | ABCA3/ ARHGDIG/ AXIN1/ BAIAP3/ C16orf10/ C16orf11/ C16orf13/ C16orf35/ C16orf38/ C16orf42/ C16orf73/ C16orf79/ C16orf91/ C1QTNF8/ CACNA1H/ CASKIN1/ CCDC154/ CCDC78/ CHTF18/ CLCN7 |
| 13D | 17 | 34647501  | 78605475  | 43957974  | 2,84 | Trisomy   | AANAT/ AARSD1/ AATK/ ABCA10/ ABCA5/ ABCA6/ ABCA8/ ABCA9/ ABCC3/ ABI3/ ACBD4/ ACE/ ACLY/ ACOX1/ ACSF2/ ACTG1/ ADAM11/ AFMID/ AKAP1/ AMZ2                                            |
| 13D | 18 | 150887    | 76115555  | 75964668  | 2,92 | Trisomy   | ABHD3/ ACAA2/ ADCYAP1/ ADNP2/ AFG3L2/ ALPK2/ ANKRD12/ ANKRD29/ ANKRD30B/ APCDD1/ AQP4/ ARHGAP28/ ASXL3/ ATP5A1/ ATP8B1/ ATP9B/ B4GALT6/ BCL2/ BRUNOL4/ C18orf1                     |
| 13D | 21 | 9887804   | 46902241  | 37014437  | 3,92 | Tetrasomy | ABCC13/ ABCG1/ ADAMTS1/ ADAMTS5/ ADARB1/ AGPAT3/ AIRE/ APP/ ATP5J/ ATP5O/ B3GALT5/ BACE2/ BACH1/ BAGE/ BAGE2/ BAGE3/ BAGE4/ BAGE5/ BRWD1/ BTG3                                     |
| 13R | 1  | 143604249 | 144092506 | 488257    | 3,50 | Tetrasomy | NBPF10/ NOTCH2NL/ PDE4DIP/ SEC22B/ region overlaps with 20.92% of PDE4DIP / region overlaps with 8.02% of PDE4DIP                                                                  |
| 13R | 1  | 144690441 | 203560506 | 58870065  | 3,93 | Tetrasomy | ABL2/ ACBD6/ ACP6/ ADAM15/ ADAMTS4/ ADAMTSL4/ ADAR/ ADCY10/ ADIPOR1/ ADORA1/ AIM2/ ALDH9A1/ ANGPTL1/ ANKRD36BL1/ ANKRD45/ ANP32E/ ANXA9/ APCS/ APH1A/ APOA1BP                      |
| 13R | 4  | 19099     | 191167889 | 191148790 | 2,96 | Trisomy   | AADAT/ AASDH/ ABCA11P/ ABCE1/ ABCG2/ ABLIM2/ ACCN5/ ACOX3/ ACSL1/ ADAD1/ ADAM29/ ADAMTS3/ ADD1/ ADH1A/ ADH1B/ ADH1C/ ADH4/ ADH5/ ADH6/ ADH7                                        |
| 13R | 6  | 110391    | 93479476  | 93369085  | 2,95 | Trisomy   | AARS2/ ABCC10/ ABCF1/ ABT1/ ACOT13/ AGER/ AGPAT1/ AIF1/ AKIRIN2/ ALDH5A1/ ANKRD6/ ANKS1A/ APOBEC2/ APOM/ ATF6B/ ATP6V1G2/ ATXN1/ B3GALT4/ B3GAT2/ BACH2                            |
| 13R | 6  | 93728762  | 170747903 | 77019141  | 2,95 | Trisomy   | ACAT2/ ADAT2/ AGPAT4/ AHI1/ AIG1/ AIM1/ AKAP12/ AKAP7/ AKD1/ ALDH8A1/ AMD1/ ARG1/ ARHGAP18/ ARID1B/ ARMC2/ ASCC3/ ASF1A/ ATG5/ BCLAF1/ BEND3                                       |
| 13R | 9  | 36912942  | 37071806  | 158864    | 1,19 | Deletion  | region overlaps with 70.21% of PAX5                                                                                                                                                |
| 13R | 9  | 122814113 | 122916922 | 102809    | 1,14 | Deletion  | region overlaps with 25.80% of CEP110 / region overlaps with 37.22% of C5                                                                                                          |
| 13R | 10 | 101955    | 135284542 | 135182587 | 2,94 | Trisomy   | A1CF/ ABCC2/ ABI1/ ABLIM1/ ACADSB/ ACBD5/ ACBD7/ ACSL5/ ACTA2/ ACTR1A/ ADAM12/ ADAM8/ ADAMTS14/ ADARB2/ ADD3/ ADK/ ADO/ ADRA2A/ ADRB1/ AFAP1L2                                     |
| 13R | 11 | 28095295  | 28246831  | 151536    | 1,15 | Deletion  | contained within METT5D1                                                                                                                                                           |
| 13R | 16 | 26671     | 2336600   | 2309929   | 1,15 | Deletion  | ABCA3/ ARHGDIG/ AXIN1/ BAIAP3/ C16orf10/ C16orf11/ C16orf13/ C16orf35/ C16orf38/ C16orf42/ C16orf73/ C16orf79/ C16orf91/ C1QTNF8/ CACNA1H/ CASKIN1/ CCDC154/ CCDC78/ CHTF18/ CLCN7 |
| 13R | 16 | 69522626  | 69735178  | 212552    | 3,57 | Tetrasomy | contained within HYDIN / region overlaps with 54.89% of HYDIN                                                                                                                      |
| 13R | 17 | 34594670  | 78605475  | 44010805  | 2,93 | Trisomy   | AANAT/ AARSD1/ AATK/ ABCA10/ ABCA5/ ABCA6/ ABCA8/ ABCA9/ ABCC3/ ABI3/ ACBD4/ ACE/ ACLY/ ACOX1/ ACSF2/ ACTG1/ ADAM11/ AFMID/ AKAP1/ AMZ2                                            |
| 13R | 18 | 150887    | 76115555  | 75964668  | 2,96 | Trisomy   | ABHD3/ ACAA2/ ADCYAP1/ ADNP2/ AFG3L2/ ALPK2/ ANKRD12/ ANKRD29/ ANKRD30B/ APCDD1/ AQP4/ ARHGAP28/ ASXL3/ ATP5A1/ ATP8B1/ ATP9B/ B4GALT6/ BCL2/ BRUNOL4/ C18orf1                     |

|     |    |           |           |           |      |            |                                                                                                                                                                    |
|-----|----|-----------|-----------|-----------|------|------------|--------------------------------------------------------------------------------------------------------------------------------------------------------------------|
| 13R | 21 | 9887804   | 46902241  | 37014437  | 4,01 | Tetrasomy  | ABCC13/ ABCG1/ ADAMTS1/ ADAMTS5/ ADARB1/ AGPAT3/ AIRE/ APP/ ATP5J/ ATP5O/ B3GALT5/ BACE2/ BACH1/ BAGE/ BAGE2/ BAGE3/ BAGE4/ BAGE5/ BRWD1/ BTG3                     |
| 14D | 1  | 111180503 | 111184864 | 4361      | 0,61 | Deletion   | region ends 30480 bp before CD53                                                                                                                                   |
| 14D | 1  | 150822463 | 150855168 | 32705     | 0,73 | Deletion   | LCE3B/ LCE3C                                                                                                                                                       |
| 14D | 2  | 34554992  | 34590289  | 35297     | 0,87 | Deletion   | region starts 748203 bp after MYADML                                                                                                                               |
| 14D | 5  | 57361978  | 57369281  | 7303      | 0,89 | Deletion   | region ends 416286 bp before PLK2                                                                                                                                  |
| 14D | 6  | 94661     | 54036094  | 53941433  | 2,61 | Trisomy    | AARS2/ ABCC10/ ABCF1/ ABT1/ ACOT13/ AGER/ AGPAT1/ AIF1/ ALDH5A1/ ANKS1A/ APOBEC2/ APOM/ ATF6B/ ATP6V1G2/ ATXN1/ B3GALT4/ BAK1/ BAT1/ BAT2/ BAT3                    |
| 14D | 6  | 54036094  | 54043515  | 7421      | 0,98 | Deletion   | intron of C6orf142                                                                                                                                                 |
| 14D | 6  | 54043515  | 170892931 | 116849416 | 2,69 | Trisomy    | ACAT2/ ADAT2/ AGPAT4/ AHI1/ AIG1/ AIM1/ AKAP12/ AKAP7/ AKD1/ AKIRIN2/ ALDH8A1/ AMD1/ ANKRD6/ ARG1/ ARHGAP18/ ARID1B/ ARMC2/ ASCC3/ ASF1A/ ATG5                     |
| 14D | 8  | 21254     | 585271    | 564017    | 2,58 | Trisomy    | C8orf42/ FBXO25/ OR4F21/ RPL23AP53/ ZNF596                                                                                                                         |
| 14D | 8  | 585271    | 593580    | 8309      | 0,78 | Deletion   | region ends 10620 bp before ERICH1                                                                                                                                 |
| 14D | 8  | 593580    | 16305294  | 15711714  | 2,60 | Trisomy    | AGPAT5/ AMAC1L2/ ANGPT2/ ARHGEF10/ BLK/ C8orf12/ C8orf48/ C8orf74/ C8orf79/ CLDN23/ CLN8/ CSMD1/ CTSB/ DEFA1/ DEFA10P/ DEFA1B/ DEFA3/ DEFA4/ DEFA5/ DEFA6          |
| 14D | 8  | 16305294  | 16325012  | 19718     | 1,19 | Deletion   | region starts 210622 bp after MSR1                                                                                                                                 |
| 14D | 8  | 16325012  | 39447879  | 23122867  | 2,64 | Trisomy    | ADAM28/ ADAM32/ ADAM5P/ ADAM7/ ADAM9/ ADAMDEC1/ ADRA1A/ ADRB3/ ASAH1/ ASH2L/ ATP6V1B2/ BAG4/ BIN3/ BMP1/ BNIP3L/ BRF2/ C8orf41/ C8orf58/ C8orf75/ C8orf80          |
| 14D | 8  | 39482094  | 40302114  | 820020    | 2,73 | Trisomy    | ADAM18/ ADAM2/ C8orf4/ IDO1/ IDO2/ region overlaps with 2.14% of ADAM3A                                                                                            |
| 14D | 8  | 40302114  | 40308418  | 6304      | 1,33 | Deletion   | region starts 170135 bp after C8orf4                                                                                                                               |
| 14D | 8  | 40308418  | 112362062 | 72053644  | 2,70 | Trisomy    | ABRA/ ADHFE1/ AGPAT6/ ANGPT1/ ANK1/ ANKRD46/ AP3M2/ ARFGEF1/ ARMC1/ ASPH/ ATP6V0D2/ ATP6V1C1/ ATP6V1H/ AZIN1/ BAALC/ BEYLA/ BHLHE22/ C8orf22/ C8orf34/ C8orf37     |
| 14D | 8  | 112362062 | 112366946 | 4884      | 0,59 | biDeletion | region ends 937387 bp before CSMD3                                                                                                                                 |
| 14D | 8  | 112366946 | 115702441 | 3335495   | 2,79 | Trisomy    | CSMD3/ MIR2053                                                                                                                                                     |
| 14D | 8  | 115702441 | 115715390 | 12949     | 0,89 | Deletion   | region ends 774510 bp before TRPS1                                                                                                                                 |
| 14D | 8  | 115715390 | 146268960 | 30553570  | 2,64 | Trisomy    | ADCK5/ ADCY8/ ANXA13/ ARC/ ASAP1/ ASAP1IT1/ ATAD2/ BAI1/ BOP1/ BREA2/ C8ORFK29/ C8orf30A/ C8orf31/ C8orf33/ C8orf51/ C8orf55/ C8orf73/ C8orf76/ C8orf77/ C8orf85   |
| 14D | 10 | 62759     | 66977105  | 66914346  | 2,60 | Trisomy    | A1CF/ ABI1/ ACBD5/ ACBD7/ ADARB2/ ADO/ AGAP4/ AGAP6/ AGAP7/ AGAP8/ AKR1C1/ AKR1C2/ AKR1C3/ AKR1C4/ AKR1CL1/ AKR1E2/ ALOX5/ ANK3/ ANKRD16/ ANKRD26                  |
| 14D | 10 | 66977105  | 66992866  | 15761     | 0,79 | Deletion   | region ends 356865 bp before CTNNA3                                                                                                                                |
| 14D | 10 | 66992866  | 135356695 | 68363829  | 2,50 | Trisomy    | ABCC2/ ABLIM1/ ACADSB/ ACSL5/ ACTA2/ ACTR1A/ ADAM12/ ADAM8/ ADAMTS14/ ADD3/ ADK/ ADRA2A/ ADRB1/ AFAP1L2/ AGAP11/ AGAP5/ AIFM2/ ALDH18A1/ ANKRD1/ ANKRD2            |
| 14D | 11 | 4924889   | 4932557   | 7668      | 0,67 | Deletion   | region overlaps with 0.25% of OR51A4                                                                                                                               |
| 14D | 14 | 18072124  | 21961276  | 3889152   | 2,53 | Trisomy    | ANG/ APEX1/ C14orf176/ CCNB1IP1/ CHD8/ FAM12A/ FAM12B/ FLJ10357/ HNRNPC/ KLHL33/ METT11D1/ METTL3/ MIR1201/ NDRG2/ OR10G2/ OR10G3/ OR11G2/ OR11H12/ OR11H4/ OR11H6 |

|     |    |           |           |          |      |            |                                                                                                                                                                                              |
|-----|----|-----------|-----------|----------|------|------------|----------------------------------------------------------------------------------------------------------------------------------------------------------------------------------------------|
| 14D | 14 | 21989775  | 105406818 | 83417043 | 2,53 | Trisomy    | ABCD4/ ABHD12B/ ABHD4/ ACIN1/ ACOT1/ ACOT2/ ACOT4/ ACOT6/ ACTN1/ ACTR10/ ACYP1/ ADAM20/ ADAM21/ ADAM21P/ ADCK1/ ADCY4/ ADSSL1/ AHNAK2/ AHTSA1/ AK7                                           |
| 14D | 17 | 526       | 78643089  | 78642563 | 2,44 | Trisomy    | AANAT/ AARSD1/ AATF/ AATK/ ABCA10/ ABCA5/ ABCA6/ ABCA8/ ABCA9/ ABCC3/ ABHD15/ ABI3/ ABR/ ACACA/ ACADVL/ ACAP1/ ACBD4/ ACCN1/ ACE/ ACLY                                                       |
| 14D | 18 | 1543      | 76116030  | 76114487 | 2,56 | Trisomy    | ABHD3/ ACAA2/ ADCYAP1/ ADNP2/ AFG3L2/ ALPK2/ ANKRD12/ ANKRD29/ ANKRD30B/ APCDD1/ AQP4/ ARHGAP28/ ASXL3/ ATP5A1/ ATP8B1/ ATP9B/ B4GALT6/ BCL2/ BRUNOL4/ C18orf1                               |
| 14D | 21 | 9758742   | 41772389  | 32013647 | 3,38 | Tetrasomy  | ABCC13/ ADAMTS1/ ADAMTS5/ APP/ ATP5J/ ATP5O/ B3GALT5/ BACE2/ BACH1/ BAGE/ BAGE2/ BAGE3/ BAGE4/ BAGE5/ BRWD1/ BTG3/ C21orf119/ C21orf130/ C21orf131/ C21orf15                                 |
| 14D | 21 | 41772389  | 41778387  | 5998     | 1,21 | Deletion   | contained within TMPRSS2                                                                                                                                                                     |
| 14D | 21 | 41778387  | 46921386  | 5142999  | 3,03 | Trisomy    | ABCG1/ ADARB1/ AGPAT3/ AIRE/ C21orf121/ C21orf122/ C21orf125/ C21orf128/ C21orf129/ C21orf2/ C21orf29/ C21orf33/ C21orf56/ C21orf57/ C21orf58/ C21orf67/ C21orf70/ C21orf84/ C21orf90/ C2CD2 |
| 14R | 1  | 111179095 | 111185486 | 6391     | 0,66 | Deletion   | region ends 29858 bp before CD53                                                                                                                                                             |
| 14R | 1  | 150822240 | 150855168 | 32928    | 0,60 | Deletion   | LCE3B/ LCE3C                                                                                                                                                                                 |
| 14R | 2  | 34564321  | 34590289  | 25968    | 0,67 | Deletion   | region starts 757532 bp after MYADML                                                                                                                                                         |
| 14R | 5  | 57359593  | 57369281  | 9688     | 0,75 | Deletion   | region ends 416286 bp before PLK2                                                                                                                                                            |
| 14R | 5  | 142607172 | 142756840 | 149668   | 0,88 | Deletion   | region overlaps with 79.61% of NR3C1                                                                                                                                                         |
| 14R | 6  | 94661     | 54036094  | 53941433 | 2,48 | Trisomy    | AARS2/ ABCC10/ ABCF1/ ABT1/ ACOT13/ AGER/ AGPAT1/ AIF1/ ALDH5A1/ ANKS1A/ APOBEC2/ APOM/ ATF6B/ ATP6V1G2/ ATXN1/ B3GALT4/ BAK1/ BAT1/ BAT2/ BAT3                                              |
| 14R | 6  | 54036094  | 54043515  | 7421     | 0,85 | Deletion   | intron of C6orf142                                                                                                                                                                           |
| 14R | 6  | 54043516  | 88935609  | 34892093 | 2,65 | Trisomy    | AKIRIN2/ B3GAT2/ BAG2/ BAI3/ BCKDHB/ BEND6/ BMP5/ C6orf147/ C6orf150/ C6orf155/ C6orf162/ C6orf163/ C6orf164/ C6orf165/ C6orf221/ C6orf57/ CD109/ CGA/ CNR1/ COL12A1                         |
| 14R | 8  | 21254     | 585271    | 564017   | 2,47 | Trisomy    | C8orf42/ FBXO25/ OR4F21/ RPL23AP53/ ZNF596                                                                                                                                                   |
| 14R | 8  | 585271    | 593580    | 8309     | 0,66 | Deletion   | region ends 10620 bp before ERICH1                                                                                                                                                           |
| 14R | 8  | 593580    | 16305294  | 15711714 | 2,55 | Trisomy    | AGPAT5/ AMAC1L2/ ANGPT2/ ARHGEF10/ BLK/ C8orf12/ C8orf48/ C8orf74/ C8orf79/ CLDN23/ CLN8/ CSMD1/ CTSB/ DEFA1/ DEFA10P/ DEFA1B/ DEFA3/ DEFA4/ DEFA5/ DEFA6                                    |
| 14R | 8  | 16305294  | 16321049  | 15755    | 1,19 | Deletion   | region starts 210622 bp after MSR1                                                                                                                                                           |
| 14R | 8  | 16321049  | 39447879  | 23126830 | 2,61 | Trisomy    | ADAM28/ ADAM32/ ADAM5P/ ADAM7/ ADAM9/ ADAMDEC1/ ADRA1A/ ADRB3/ ASAH1/ ASH2L/ ATP6V1B2/ BAG4/ BIN3/ BMP1/ BNIP3L/ BRF2/ C8orf41/ C8orf58/ C8orf75/ C8orf80                                    |
| 14R | 8  | 39482094  | 40302114  | 820020   | 2,73 | Trisomy    | ADAM18/ ADAM2/ C8orf4/ IDO1/ IDO2/ region overlaps with 2.14% of ADAM3A                                                                                                                      |
| 14R | 8  | 40303351  | 40307779  | 4428     | 1,17 | Deletion   | region starts 171372 bp after C8orf4                                                                                                                                                         |
| 14R | 8  | 40307779  | 112362062 | 72054283 | 2,68 | Trisomy    | ABRA/ ADHFE1/ AGPAT6/ ANGPT1/ ANK1/ ANKRD46/ AP3M2/ ARFGEF1/ ARMC1/ ASPH/ ATP6V0D2/ ATP6V1C1/ ATP6V1H/ AZIN1/ BAALC/ BEYLA/ BHLHE22/ C8orf22/ C8orf34/ C8orf37                               |
| 14R | 8  | 112362062 | 112366946 | 4884     | 0,55 | biDeletion | region ends 937387 bp before CSMD3                                                                                                                                                           |
| 14R | 8  | 112366946 | 115702441 | 3335495  | 2,72 | Trisomy    | CSMD3/ MIR2053                                                                                                                                                                               |
| 14R | 8  | 115702441 | 115715390 | 12949    | 0,81 | Deletion   | region ends 774510 bp before TRPS1                                                                                                                                                           |

|     |    |           |           |           |      |            |                                                                                                                                                                                              |
|-----|----|-----------|-----------|-----------|------|------------|----------------------------------------------------------------------------------------------------------------------------------------------------------------------------------------------|
| 14R | 8  | 115715390 | 146268960 | 30553570  | 2,61 | Trisomy    | ADCK5/ ADCY8/ ANXA13/ ARC/ ASAP1/ ASAP11T1/ ATAD2/ BAI1/ BOP1/ BREA2/ C8ORFK29/ C8orf30A/ C8orf31/ C8orf33/ C8orf51/ C8orf55/ C8orf73/ C8orf76/ C8orf77/ C8orf85                             |
| 14R | 9  | 11597082  | 15161674  | 3564592   | 1,12 | Deletion   | C9orf150/ CER1/ FREM1/ LOC389705/ MPDZ/ NFIB/ TYRP1/ ZDHHC21/ region overlaps with 0.02% of TTC39B                                                                                           |
| 14R | 9  | 20999381  | 21435602  | 436221    | 1,10 | Deletion   | IFNA1/ IFNA10/ IFNA13/ IFNA14/ IFNA16/ IFNA17/ IFNA2/ IFNA21/ IFNA4/ IFNA5/ IFNA6/ IFNA7/ IFNA8/ IFNB1/ IFNW1/ KLHL9/ region overlaps with 5.10% of PTPLAD2                                  |
| 14R | 9  | 21435602  | 28922825  | 7487223   | 0,47 | biDeletion | C9orf11/ C9orf53/ C9orf72/ C9orf82/ CDKN2A/ CDKN2B/ CDKN2BAS/ DMRTA1/ ELAVL2/ IFNE/ IFNK/ IFT74/ LINGO2/ LOC554202/ LRRRC19/ MIR31/ MIR873/ MIR876/ MOBKL2B/ MTAP                            |
| 14R | 9  | 29492688  | 31699432  | 2206744   | 1,10 | Deletion   | region starts 613734 bp after MIR873                                                                                                                                                         |
| 14R | 9  | 95941993  | 139913995 | 43972002  | 2,65 | Trisomy    | ABCA1/ ABCA2/ ABL1/ ABO/ ACTL7A/ ACTL7B/ ADAMTS13/ ADAMTSL2/ AGPAT2/ AIF1L/ AK1/ AKAP2/ AKNA/ ALAD/ ALDOB/ ALG2/ AMBP/ ANAPC2/ ANGPTL2/ ANKS6                                                |
| 14R | 10 | 18036145  | 66977105  | 48940960  | 2,55 | Trisomy    | A1CF/ ABI1/ ACBD5/ ADO/ AGAP4/ AGAP6/ AGAP7/ AGAP8/ ALOX5/ ANK3/ ANKRD26/ ANKRD30A/ ANTXRL/ ANUBL1/ ANXA2P3/ ANXA8/ ANXA8/ ANXA8L1/ ANXA8L1/ ANXA8L2                                         |
| 14R | 10 | 66977105  | 66984444  | 7339      | 0,62 | Deletion   | region ends 365287 bp before CTNNA3                                                                                                                                                          |
| 14R | 10 | 66984444  | 135356695 | 68372251  | 2,48 | Trisomy    | ABCC2/ ABLIM1/ ACADSB/ ACSL5/ ACTA2/ ACTR1A/ ADAM12/ ADAM8/ ADAMTS14/ ADD3/ ADK/ ADRA2A/ ADRB1/ AFAP1L2/ AGAP11/ AGAP5/ AIFM2/ ALDH18A1/ ANKRD1/ ANKRD2                                      |
| 14R | 11 | 4924889   | 4932266   | 7377      | 0,58 | Deletion   | region overlaps with 0.26% of OR51A4                                                                                                                                                         |
| 14R | 12 | 9523480   | 9579064   | 55584     | 0,72 | Deletion   | region starts 31444 bp after DDX12                                                                                                                                                           |
| 14R | 12 | 11589284  | 12093008  | 503724    | 1,07 | Deletion   | ETV6                                                                                                                                                                                         |
| 14R | 14 | 18072124  | 21961276  | 3889152   | 2,52 | Trisomy    | ANG/ APEX1/ C14orf176/ CCNB1IP1/ CHD8/ FAM12A/ FAM12B/ FLJ10357/ HNRNPC/ KLHL33/ METT11D1/ METTL3/ MIR1201/ NDRG2/ OR10G2/ OR10G3/ OR11G2/ OR11H12/ OR11H4/ OR11H6                           |
| 14R | 14 | 21989775  | 102081086 | 80091311  | 2,48 | Trisomy    | ABCD4/ ABHD12B/ ABHD4/ ACIN1/ ACOT1/ ACOT2/ ACOT4/ ACOT6/ ACTN1/ ACTR10/ ACYP1/ ADAM20/ ADAM21/ ADAM21P/ ADCK1/ ADCY4/ AHS1/ AK7/ AKAP5/ AKAP6                                               |
| 14R | 17 | 18556518  | 78550684  | 59994166  | 2,53 | Trisomy    | AANAT/ AARSD1/ AATF/ AATK/ ABCA10/ ABCA5/ ABCA6/ ABCA8/ ABCA9/ ABCC3/ ABHD15/ ABI3/ ACACA/ ACBD4/ ACCN1/ ACE/ ACRYL/ ACOX1/ ACSF2/ ACTG1                                                     |
| 14R | 18 | 20188513  | 64590323  | 44401810  | 2,65 | Trisomy    | ACAA2/ ALPK2/ AQP4/ ASXL3/ ATP5A1/ ATP8B1/ B4GALT6/ BCL2/ BRUNOL4/ C18orf10/ C18orf16/ C18orf20/ C18orf21/ C18orf25/ C18orf26/ C18orf32/ C18orf34/ C18orf54/ CCBE1/ CCDC11                   |
| 14R | 21 | 9758742   | 41772389  | 32013647  | 3,26 | Tetrasomy  | ABCC13/ ADAMTS1/ ADAMTS5/ APP/ ATP5J/ ATP5O/ B3GALT5/ BACE2/ BACH1/ BAGE/ BAGE2/ BAGE3/ BAGE4/ BAGE5/ BRWD1/ BTG3/ C21orf119/ C21orf130/ C21orf131/ C21orf15                                 |
| 14R | 21 | 41772389  | 41778387  | 5998      | 1,17 | Deletion   | contained within TMPRSS2                                                                                                                                                                     |
| 14R | 21 | 41778387  | 46921386  | 5142999   | 2,97 | Tetrasomy  | ABCG1/ ADARB1/ AGPAT3/ AIRE/ C21orf121/ C21orf122/ C21orf125/ C21orf128/ C21orf129/ C21orf2/ C21orf29/ C21orf33/ C21orf56/ C21orf57/ C21orf58/ C21orf67/ C21orf70/ C21orf84/ C21orf90/ C2CD2 |
| 15D | 1  | 150838887 | 150849395 | 10508     | 4,49 | Tetrasomy  | LCE3C                                                                                                                                                                                        |
| 15D | 4  | 2281      | 191261905 | 191259624 | 2,37 | Trisomy    | AADAT/ AASDH/ ABCA11P/ ABCE1/ ABCG2/ ABLIM2/ ACCN5/ ACOX3/ ACSL1/ ADAD1/ ADAM29/ ADAMTS3/ ADD1/ ADH1A/ ADH1B/ ADH1C/ ADH4/ ADH5/ ADH6/ ADH7                                                  |

|     |    |           |           |           |      |            |                                                                                                                                                                            |
|-----|----|-----------|-----------|-----------|------|------------|----------------------------------------------------------------------------------------------------------------------------------------------------------------------------|
| 15D | 8  | 21254     | 117862895 | 117841641 | 2,36 | Trisomy    | ABRA/ ADAM18/ ADAM2/ ADAM28/ ADAM32/ ADAM3A/ ADAM5P/ ADAM7/ ADAM9/ ADAMDEC1/ ADHFE1/ ADRA1A/ ADRB3/ AGPAT5/ AGPAT6/ AMAC1L2/ ANGPT1/ ANGPT2/ ANK1/ ANKRD46                 |
| 15D | 8  | 119436963 | 146268960 | 26831997  | 2,46 | Trisomy    | ADCK5/ ADCY8/ ANXA13/ ARC/ ASAP1/ ASAP1IT1/ ATAD2/ BAI1/ BOP1/ BREA2/ C8ORFK29/ C8orf30A/ C8orf31/ C8orf33/ C8orf51/ C8orf55/ C8orf73/ C8orf76/ C8orf77/ CHRAC1            |
| 15D | 14 | 18072124  | 21963443  | 3891319   | 2,40 | Trisomy    | ANG/ APEX1/ C14orf176/ CCNB1P1/ CHD8/ FAM12A/ FAM12B/ FLJ10357/ HNRNPC/ KLHL33/ METT11D1/ METTL3/ MIR1201/ NDRG2/ OR10G2/ OR10G3/ OR11G2/ OR11H2/ OR11H4/ OR11H6           |
| 15D | 14 | 21989775  | 106356483 | 84366708  | 2,40 | Trisomy    | ABCD4/ ABHD12B/ ABHD4/ ACIN1/ ACOT1/ ACOT2/ ACOT4/ ACOT6/ ACTN1/ ACTR10/ ACYP1/ ADAM20/ ADAM21/ ADAM21P/ ADAM6/ ADCK1/ ADCY4/ ADSSL1/ AHNAK2/ AHTA1                        |
| 15D | 17 | 526       | 78643089  | 78642563  | 2,54 | Trisomy    | AANAT/ AARSD1/ AATF/ AATK/ ABCA10/ ABCA5/ ABCA6/ ABCA8/ ABCA9/ ABCC3/ ABHD15/ ABI3/ ABR/ ACACA/ ACADVL/ ACAP1/ ACBD4/ ACCN1/ ACE/ ACLY                                     |
| 15D | 18 | 1543      | 76116030  | 76114487  | 2,44 | Trisomy    | ABHD3/ ACAA2/ ADCYAP1/ ADNP2/ AFG3L2/ ALPK2/ ANKRD12/ ANKRD29/ ANKRD30B/ APCDD1/ AQP4/ ARHGAP28/ ASXL3/ ATP5A1/ ATP8B1/ ATP9B/ B4GALT6/ BCL2/ BRUNOL4/ C18orf1             |
| 15D | 20 | 1500443   | 1541876   | 41433     | 2,46 | Trisomy    | contained within SIRPB1 / region overlaps with 38.35% of SIRPB1                                                                                                            |
| 15D | 21 | 9758742   | 46921386  | 37162644  | 3,01 | Trisomy    | ABCC13/ ABCG1/ ADAMTS1/ ADAMTS5/ ADARB1/ AGPAT3/ AIRE/ APP/ ATP5J/ ATP5O/ B3GALT5/ BACE2/ BACH1/ BAGE/ BAGE2/ BAGE3/ BAGE4/ BAGE5/ BRWD1/ BTG3                             |
| 15R | 4  | 2281      | 9819342   | 9817061   | 2,59 | Trisomy    | ABCA11P/ ABLIM2/ ACOX3/ ADD1/ ADRA2C/ AFAP1/ ATP5I/ C4orf10/ C4orf23/ C4orf42/ C4orf44/ C4orf48/ C4orf50/ C4orf6/ CCDC96/ CNO/ CPLX1/ CPZ/ CRIPAK/ CRMP1                   |
| 15R | 4  | 9839654   | 191261905 | 181422251 | 2,52 | Trisomy    | AADAT/ AASDH/ ABCE1/ ABCG2/ ACCN5/ ACSL1/ ADAD1/ ADAM29/ ADAMTS3/ ADH1A/ ADH1B/ ADH1C/ ADH4/ ADH5/ ADH6/ ADH7/ AFF1/ AFM/ AFP/ AGA                                         |
| 15R | 8  | 21254     | 39369014  | 39347760  | 2,51 | Trisomy    | ADAM28/ ADAM32/ ADAM7/ ADAM9/ ADAMDEC1/ ADRA1A/ ADRB3/ AGPAT5/ AMAC1L2/ ANGPT2/ ARHGEF10/ ASAH1/ ASH2L/ ATP6V1B2/ BAG4/ BIN3/ BLK/ BMP1/ BNIP3L/ BRF2                      |
| 15R | 8  | 39505236  | 40302959  | 797723    | 2,57 | Trisomy    | ADAM18/ ADAM2/ C8orf4/ IDO1/ IDO2                                                                                                                                          |
| 15R | 8  | 40307779  | 117862895 | 77555116  | 2,50 | Trisomy    | ABRA/ ADHFE1/ AGPAT6/ ANGPT1/ ANK1/ ANKRD46/ AP3M2/ ARFGEF1/ ARMC1/ ASPH/ ATP6V0D2/ ATP6V1C1/ ATP6V1H/ AZIN1/ BAALC/ BEYLA/ BHLHE22/ C8orf22/ C8orf34/ C8orf37             |
| 15R | 8  | 119436963 | 134234089 | 14797126  | 2,53 | Trisomy    | ADCY8/ ANXA13/ ASAP1/ ASAP1IT1/ ATAD2/ C8orf76/ COL14A1/ COLEC10/ DEPDC6/ DERL1/ DSCC1/ EFR3A/ ENPP2/ FAM49B/ FAM83A/ FAM84B/ FAM91A1/ FBXO32/ FER1L6/ GSDMC               |
| 15R | 8  | 134246380 | 146268960 | 12022580  | 2,60 | Trisomy    | ADCK5/ ARC/ BAI1/ BOP1/ BREA2/ C8ORFK29/ C8orf30A/ C8orf31/ C8orf33/ C8orf51/ C8orf55/ C8orf73/ C8orf77/ CHRAC1/ COL22A1/ COMMD5/ CPSF1/ CYC1/ CYHR1/ CYP11B1              |
| 15R | 9  | 20610931  | 21314491  | 703560    | 1,07 | Deletion   | IFNA10/ IFNA14/ IFNA16/ IFNA17/ IFNA21/ IFNA4/ IFNA5/ IFNA7/ IFNB1/ IFNW1/ KIAA1797/ MIR491/ PTPLAD2/ region overlaps with 0.23% of MLLT3                                  |
| 15R | 9  | 21314491  | 21794047  | 479556    | 0,64 | biDeletion | IFNA1/ IFNA13/ IFNA2/ IFNA6/ IFNA8/ IFNE/ KLHL9/ LOC554202/ MIR31/ region overlaps with 0.29% of MTAP                                                                      |
| 15R | 9  | 21794047  | 22534376  | 740329    | 0,38 | biDeletion | C9orf53/ CDKN2A/ CDKN2B/ CDKN2BAS/ DMRTA1/ region overlaps with 8.36% of MTAP                                                                                              |
| 15R | 9  | 22534376  | 23453170  | 918794    | 0,75 | Deletion   | region starts 91903 bp after DMRTA1                                                                                                                                        |
| 15R | 9  | 23453170  | 39238497  | 15785327  | 1,07 | Deletion   | ACO1/ ALDH1B1/ ANKRD18A/ ANXA2P2/ APTX/ AQP3/ AQP7/ ARID3C/ B4GALT1/ BAG1/ C9orf100/ C9orf11/ C9orf122/ C9orf128/ C9orf131/ C9orf144/ C9orf144B/ C9orf23/ C9orf24/ C9orf25 |

|     |    |          |           |           |      |           |                                                                                                                                                                     |
|-----|----|----------|-----------|-----------|------|-----------|---------------------------------------------------------------------------------------------------------------------------------------------------------------------|
| 15R | 14 | 18072124 | 21961276  | 3889152   | 2,55 | Trisomy   | ANG/ APEX1/ C14orf176/ CCNB1IP1/ CHD8/ FAM12A/ FAM12B/ FLJ10357/ HNRNPC/ KLHL33/ METT11D1/ METTL3/ MIR1201/ NDRG2/ OR10G2/ OR10G3/ OR11G2/ OR11H12/ OR11H4/ OR11H6  |
| 15R | 14 | 22064254 | 105406818 | 83342564  | 2,52 | Trisomy   | ABCD4/ ABHD12B/ ABHD4/ ACIN1/ ACOT1/ ACOT2/ ACOT4/ ACOT6/ ACTN1/ ACTR10/ ACYP1/ ADAM20/ ADAM21/ ADAM21P/ ADCK1/ ADCY4/ ADSSL1/ AHNAK2/ AHS1/ AK7                    |
| 15R | 17 | 526      | 78643089  | 78642563  | 2,54 | Trisomy   | AANAT/ AARSD1/ AATF/ AATK/ ABCA10/ ABCA5/ ABCA6/ ABCA8/ ABCA9/ ABCC3/ ABHD15/ ABI3/ ABR/ ACACA/ ACADVL/ ACAP1/ ACBD4/ ACCN1/ ACE/ ACLY                              |
| 15R | 18 | 1543     | 76116030  | 76114487  | 2,51 | Trisomy   | ABHD3/ ACAA2/ ADCYAP1/ ADNP2/ AFG3L2/ ALPK2/ ANKRD12/ ANKRD29/ ANKRD30B/ APCDD1/ AQP4/ ARHGAP28/ ASXL3/ ATP5A1/ ATP8B1/ ATP9B/ B4GALT6/ BCL2/ BRUNOL4/ C18orf1      |
| 15R | 21 | 9758742  | 13376955  | 3618213   | 2,55 | Trisomy   | BAGE/ BAGE2/ BAGE3/ BAGE4/ BAGE5/ TPTE/ region overlaps with 1.23% of C21orf99                                                                                      |
| 15R | 21 | 13376955 | 46921386  | 33544431  | 3,82 | Tetrasomy | ABCC13/ ABCG1/ ADAMTS1/ ADAMTS5/ ADARB1/ AGPAT3/ AIRE/ APP/ ATP5J/ ATP5O/ B3GALT5/ BACE2/ BACH1/ BRWD1/ BTG3/ C21orf119/ C21orf121/ C21orf122/ C21orf125/ C21orf128 |
| 16D | 3  | 68829055 | 68830775  | 1720      | 0,68 | Deletion  | region ends 32832 bp before FAM19A4                                                                                                                                 |
| 16D | 4  | 2281     | 34463122  | 34460841  | 2,87 | Trisomy   | ABCA11P/ ABLIM2/ ACOX3/ ADD1/ ADRA2C/ AFAP1/ ANAPC4/ ATP5I/ BOD1L/ BST1/ C1QTNF7/ C4orf10/ C4orf23/ C4orf42/ C4orf44/ C4orf48/ C4orf50/ C4orf52/ C4orf6/ CC2D2A     |
| 16D | 4  | 34480571 | 191261905 | 156781334 | 2,86 | Trisomy   | AADAT/ AASDH/ ABCE1/ ABCG2/ ACCN5/ ACSL1/ ADAD1/ ADAM29/ ADAMTS3/ ADH1A/ ADH1B/ ADH1C/ ADH4/ ADH5/ ADH6/ ADH7/ AFF1/ AFM/ AFP/ AGA                                  |
| 16D | 6  | 94661    | 170892931 | 170798270 | 2,87 | Trisomy   | AARS2/ ABCC10/ ABCF1/ ABT1/ ACAT2/ ACOT13/ ADAT2/ AGER/ AGPAT1/ AGPAT4/ AHI1/ AIF1/ AIG1/ AIM1/ AKAP12/ AKAP7/ AKD1/ AKIRIN2/ ALDH5A1/ ALDH8A1                      |
| 16D | 8  | 21254    | 39452297  | 39431043  | 2,87 | Trisomy   | ADAM28/ ADAM32/ ADAM5P/ ADAM7/ ADAM9/ ADAMDEC1/ ADRA1A/ ADRB3/ AGPAT5/ AMAC1L2/ ANGPT2/ ARHGEF10/ ASAH1/ ASH2L/ ATP6V1B2/ BAG4/ BIN3/ BLK/ BMP1/ BNIP3L             |
| 16D | 8  | 39481466 | 146268960 | 106787494 | 2,88 | Trisomy   | ABRA/ ADAM18/ ADAM2/ ADCK5/ ADCY8/ ADHFE1/ AGPAT6/ ANGPT1/ ANK1/ ANKRD46/ ANXA13/ AP3M2/ ARC/ ARFGEF1/ ARMC1/ ASAP1/ ASAP1IT1/ ASPH/ ATAD2/ ATP6V0D2                |
| 16D | 9  | 36587    | 140211216 | 140174629 | 2,84 | Trisomy   | ABCA1/ ABCA2/ ABL1/ ABO/ ACER2/ ACO1/ ACTL7A/ ACTL7B/ ADAMTS13/ ADAMTSL1/ ADAMTSL2/ AGPAT2/ AGTPBP1/ AIF1L/ AK1/ AK3/ AKAP2/ AKNA/ ALAD/ ALDH1A1                    |
| 16D | 10 | 62759    | 135356695 | 135293936 | 2,88 | Trisomy   | A1CF/ ABCC2/ ABI1/ ABLIM1/ ACADSB/ ACBD5/ ACBD7/ ACSL5/ ACTA2/ ACTR1A/ ADAM12/ ADAM8/ ADAMTS14/ ADARB2/ ADD3/ ADK/ ADO/ ADRA2A/ ADRB1/ AFAP1L2                      |
| 16D | 14 | 18072124 | 21551576  | 3479452   | 2,94 | Trisomy   | ANG/ APEX1/ C14orf176/ CCNB1IP1/ CHD8/ FAM12A/ FAM12B/ FLJ10357/ HNRNPC/ KLHL33/ METT11D1/ METTL3/ MIR1201/ NDRG2/ OR10G2/ OR10G3/ OR11G2/ OR11H12/ OR11H4/ OR11H6  |
| 16D | 14 | 22024501 | 105406818 | 83382317  | 2,86 | Trisomy   | ABCD4/ ABHD12B/ ABHD4/ ACIN1/ ACOT1/ ACOT2/ ACOT4/ ACOT6/ ACTN1/ ACTR10/ ACYP1/ ADAM20/ ADAM21/ ADAM21P/ ADCK1/ ADCY4/ ADSSL1/ AHNAK2/ AHS1/ AK7                    |
| 16D | 15 | 22226103 | 22266940  | 40837     | 0,79 | Deletion  | region ends 87457 bp before PWRN1                                                                                                                                   |
| 16D | 15 | 32510409 | 32592633  | 82224     | 3,65 | Tetrasomy | region overlaps with 7.97% of GOLGA8A                                                                                                                               |
| 16D | 15 | 51571518 | 51577774  | 6256      | 1,11 | Deletion  | region ends 15456 bp before WDR72                                                                                                                                   |
| 16D | 15 | 82332815 | 82336344  | 3529      | 0,94 | Deletion  | intron of ADAMTSL3                                                                                                                                                  |

|     |    |           |           |           |      |           |                                                                                                                                                                 |
|-----|----|-----------|-----------|-----------|------|-----------|-----------------------------------------------------------------------------------------------------------------------------------------------------------------|
| 16D | 17 | 526       | 78643089  | 78642563  | 2,89 | Trisomy   | AANAT/ AARSD1/ AATF/ AATK/ ABCA10/ ABCA5/ ABCA6/ ABCA8/ ABCA9/ ABCC3/ ABHD15/ ABI3/ ABR/ ACACA/ ACADVL/ ACAP1/ ACBD4/ ACCN1/ ACE/ ACLY                          |
| 16D | 18 | 1543      | 76116030  | 76114487  | 2,87 | Trisomy   | ABHD3/ ACAA2/ ADCYAP1/ ADNP2/ AFG3L2/ ALPK2/ ANKRD12/ ANKRD29/ ANKRD30B/ APCDD1/ AQP4/ ARHGAP28/ ASXL3/ ATP5A1/ ATP8B1/ ATP9B/ B4GALT6/ BCL2/ BRUNOL4/ C18orf1  |
| 16D | 21 | 9758742   | 46921386  | 37162644  | 3,77 | Tetrasomy | ABCC13/ ABCG1/ ADAMTS1/ ADAMTS5/ ADARB1/ AGPAT3/ AIRE/ APP/ ATP5J/ ATP5O/ B3GALT5/ BACE2/ BACH1/ BAGE/ BAGE2/ BAGE3/ BAGE4/ BAGE5/ BRWD1/ BTG3                  |
| 16D | X  | 2708815   | 154599662 | 151890847 | 3,59 | Tetrasomy | ABCB7/ ABCD1/ ACE2/ ACOT9/ ACRC/ ACSL4/ ACTRT1/ AFF2/ AGTR2/ AIFM1/ AKAP14/ AKAP4/ ALAS2/ ALG13/ AMELX/ AMMECR1/ AMOT/ ANKRD58/ AP1S2/ APEX2                    |
| 16R | 3  | 47125691  | 47152935  | 27244     | 1,10 | Deletion  | contained within SETD2                                                                                                                                          |
| 16R | 3  | 68828961  | 68830775  | 1814      | 0,69 | Deletion  | region ends 32832 bp before FAM19A4                                                                                                                             |
| 16R | 3  | 69591622  | 69672989  | 81367     | 1,20 | Deletion  | region starts 73501 bp after FRMD4B                                                                                                                             |
| 16R | 4  | 2281      | 34455442  | 34453161  | 2,90 | Trisomy   | ABCA11P/ ABLIM2/ ACOX3/ ADD1/ ADRA2C/ AFAP1/ ANAPC4/ ATP5I/ BOD1L/ BST1/ C1QTNF7/ C4orf10/ C4orf23/ C4orf42/ C4orf44/ C4orf48/ C4orf50/ C4orf52/ C4orf6/ CC2D2A |
| 16R | 4  | 34495327  | 69057543  | 34562216  | 2,89 | Trisomy   | AASDH/ APBB2/ ARAP2/ ARL9/ ATP10D/ ATP8A1/ BEND4/ C4orf14/ C4orf19/ C4orf34/ CENPC1/ CEP135/ CHIC2/ CHRNA9/ CLOCK/ CNGA1/ COMMD8/ CORIN/ COX7B2/ CWH43          |
| 16R | 4  | 69096405  | 191261905 | 122165500 | 2,88 | Trisomy   | AADAT/ ABCE1/ ABCG2/ ACCN5/ ACSL1/ ADAD1/ ADAM29/ ADAMTS3/ ADH1A/ ADH1B/ ADH1C/ ADH4/ ADH5/ ADH6/ ADH7/ AFF1/ AFM/ AFP/ AGA/ AGPAT9                             |
| 16R | 6  | 94661     | 103841520 | 103746859 | 2,89 | Trisomy   | AARS2/ ABCC10/ ABCF1/ ABT1/ ACOT13/ AGER/ AGPAT1/ AIF1/ AKIRIN2/ ALDH5A1/ ANKRD6/ ANKS1A/ APOBEC2/ APOM/ ASCC3/ ATF6B/ ATP6V1G2/ ATXN1/ B3GALT4/ B3GAT2         |
| 16R | 6  | 103858144 | 170892931 | 67034787  | 2,89 | Trisomy   | ACAT2/ ADAT2/ AGPAT4/ AHI1/ AIG1/ AIM1/ AKAP12/ AKAP7/ AKD1/ ALDH8A1/ AMD1/ ARG1/ ARHGAP18/ ARID1B/ ARMC2/ ASF1A/ ATG5/ BCLAF1/ BEND3/ BET3L                    |
| 16R | 7  | 52911     | 38273603  | 38220692  | 1,14 | Deletion  | AAA1/ ABCB5/ ACTB/ ADAP1/ ADCYAP1R1/ AGR2/ AGR3/ AHR/ AIMP2/ AMZ1/ ANKMY2/ ANLN/ AOA/ AQP1/ ARL4A/ AVL9/ BBS9/ BMPER/ BZW2/ C1GALT1                             |
| 16R | 7  | 38273603  | 38323288  | 49685     | 3,94 | Tetrasomy | region overlaps with 12.42% of TARP                                                                                                                             |
| 16R | 7  | 38355929  | 58023918  | 19667989  | 1,15 | Deletion  | ABCA13/ ADCY1/ AEBP1/ AMPH/ BLVRA/ C7orf10/ C7orf11/ C7orf25/ C7orf36/ C7orf40/ C7orf44/ C7orf57/ C7orf65/ C7orf69/ C7orf72/ CAMK2B/ CCM2/ CCT6A/ CDC14C/ CDK13 |
| 16R | 7  | 58023918  | 158819766 | 100795848 | 2,92 | Trisomy   | AASS/ ABCB1/ ABCB4/ ABCB8/ ABCF2/ ABHD11/ ABP1/ ACCN3/ ACHE/ ACN9/ ACTL6B/ ACTR3B/ ACTR3C/ ADAM22/ ADCK2/ AGAP3/ AGBL3/ AGFG2/ AGK/ AHCYL2                      |
| 16R | 8  | 21254     | 39452297  | 39431043  | 2,89 | Trisomy   | ADAM28/ ADAM32/ ADAM5P/ ADAM7/ ADAM9/ ADAMDEC1/ ADRA1A/ ADRB3/ AGPAT5/ AMAC1L2/ ANGPT2/ ARHGAP10/ ASAH1/ ASH2L/ ATP6V1B2/ BAG4/ BIN3/ BLK/ BMP1/ BNIP3L         |
| 16R | 8  | 39481466  | 71116653  | 31635187  | 2,91 | Trisomy   | ADAM18/ ADAM2/ ADHFE1/ AGPAT6/ ANK1/ AP3M2/ ARFGF1/ ARMC1/ ASPH/ ATP6V1H/ BEYLA/ BHLHE22/ C8orf22/ C8orf34/ C8orf4/ C8orf40/ C8orf44/ C8orf45/ C8orf46/ C8orf71 |
| 16R | 8  | 71123827  | 146268960 | 75145133  | 2,89 | Trisomy   | ABRA/ ADCK5/ ADCY8/ ANGPT1/ ANKRD46/ ANXA13/ ARC/ ASAP1/ ASAP1IT1/ ATAD2/ ATP6V0D2/ ATP6V1C1/ AZIN1/ BAALC/ BAI1/ BOP1/ BREA2/ C8ORF29/ C8orf30A/ C8orf31       |
| 16R | 9  | 36587     | 140211216 | 140174629 | 2,85 | Trisomy   | ABCA1/ ABCA2/ ABL1/ ABO/ ACER2/ ACO1/ ACTL7A/ ACTL7B/ ADAMTS13/ ADAMTSL1/ ADAMTSL2/ AGPAT2/ AGTPBP1/ AIF1L/ AK1/ AK3/ AKAP2/ AKNA/ ALAD/ ALDH1A1                |

|     |    |          |           |           |      |           |                                                                                                                                                                    |
|-----|----|----------|-----------|-----------|------|-----------|--------------------------------------------------------------------------------------------------------------------------------------------------------------------|
| 16R | 10 | 62759    | 135356695 | 135293936 | 2,86 | Trisomy   | A1CF/ ABCC2/ ABI1/ ABLIM1/ ACADSB/ ACBD5/ ACBD7/ ACSL5/ ACTA2/ ACTR1A/ ADAM12/ ADAM8/ ADAMTS14/ ADARB2/ ADD3/ ADK/ ADO/ ADRA2A/ ADRB1/ AFAP1L2                     |
| 16R | 12 | 11926923 | 11951664  | 24741     | 1,16 | Deletion  | region overlaps with 51.21% of ETV6                                                                                                                                |
| 16R | 14 | 18072124 | 21549544  | 3477420   | 2,90 | Trisomy   | ANG/ APEX1/ C14orf176/ CCNB1IP1/ CHD8/ FAM12A/ FAM12B/ FLJ10357/ HNRNPC/ KLHL33/ METT11D1/ METTL3/ MIR1201/ NDRG2/ OR10G2/ OR10G3/ OR11G2/ OR11H12/ OR11H4/ OR11H6 |
| 16R | 14 | 22024501 | 105406818 | 83382317  | 2,86 | Trisomy   | ABCD4/ ABHD12B/ ABHD4/ ACIN1/ ACOT1/ ACOT2/ ACOT4/ ACOT6/ ACTN1/ ACTR10/ ACYP1/ ADAM20/ ADAM21/ ADAM21P/ ADCK1/ ADCY4/ ADSSL1/ AHNAK2/ AHSA1/ AK7                  |
| 16R | 15 | 22223341 | 22273037  | 49696     | 0,89 | Deletion  | region ends 81360 bp before PWRN1                                                                                                                                  |
| 16R | 15 | 32510009 | 32611577  | 101568    | 3,56 | Tetrasomy | region overlaps with 6.69% of GOLGA8B / region overlaps with 6.84% of GOLGA8A                                                                                      |
| 16R | 15 | 51571518 | 51577774  | 6256      | 1,11 | Deletion  | region ends 15456 bp before WDR72                                                                                                                                  |
| 16R | 15 | 82332815 | 82336344  | 3529      | 0,94 | Deletion  | intron of ADAMTSL3                                                                                                                                                 |
| 16R | 16 | 3713395  | 3763668   | 50273     | 1,07 | Deletion  | region overlaps with 96.69% of CREBBP                                                                                                                              |
| 16R | 17 | 526      | 78643089  | 78642563  | 2,83 | Trisomy   | AANAT/ AARSD1/ AATF/ AATK/ ABCA10/ ABCA5/ ABCA6/ ABCA8/ ABCA9/ ABCC3/ ABHD15/ ABI3/ ABR/ ACACA/ ACADVL/ ACAP1/ ACBD4/ ACCN1/ ACE/ ACLY                             |
| 16R | 18 | 1543     | 76116030  | 76114487  | 2,86 | Trisomy   | ABHD3/ ACAA2/ ADCYAP1/ ADNP2/ AFG3L2/ ALPK2/ ANKRD12/ ANKRD29/ ANKRD30B/ APCDD1/ AQP4/ ARHGAP28/ ASXL3/ ATP5A1/ ATP8B1/ ATP9B/ B4GALT6/ BCL2/ BRUNOL4/ C18orf1     |
| 16R | 21 | 9758742  | 46921386  | 37162644  | 3,71 | Tetrasomy | ABCC13/ ABCG1/ ADAMTS1/ ADAMTS5/ ADARB1/ AGPAT3/ AIRE/ APP/ ATP5J/ ATP5O/ B3GALT5/ BACE2/ BACH1/ BAGE/ BAGE2/ BAGE3/ BAGE4/ BAGE5/ BRWD1/ BTG3                     |

Genomic positions according to NCBI Build, Version 36.1.



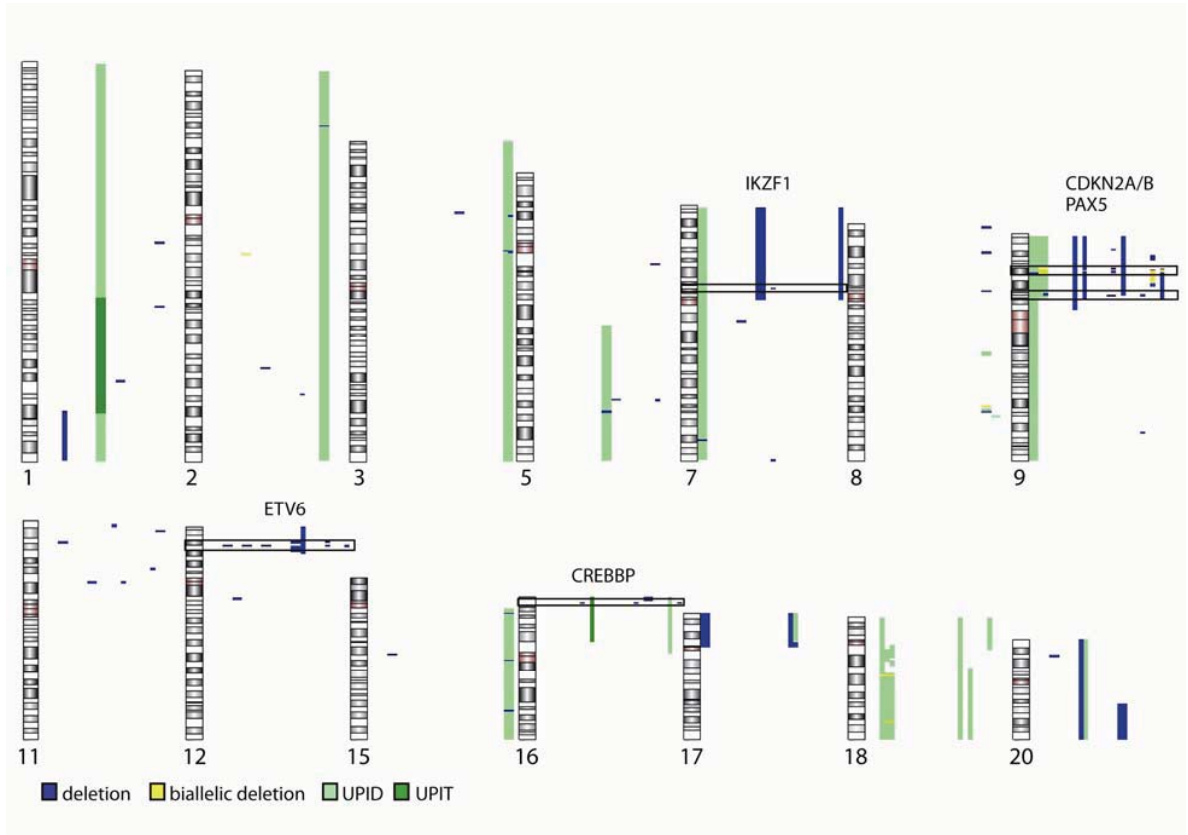

**Figure S1. Overview of deletions and UPID/UPIT of selected chromosomes with recurrent genomic aberrations of 16 HD ALL relapse cases.** Numbers below the cytoband refer to chromosome numbers. Each column to the right of the cytoband represents results from diagnosis/relapse samples from all cases (#1-16 from left to right) with the respective aberration (see color code) in a particular region. Rectangles show recurrently affected regions comprising the genes indicated above.

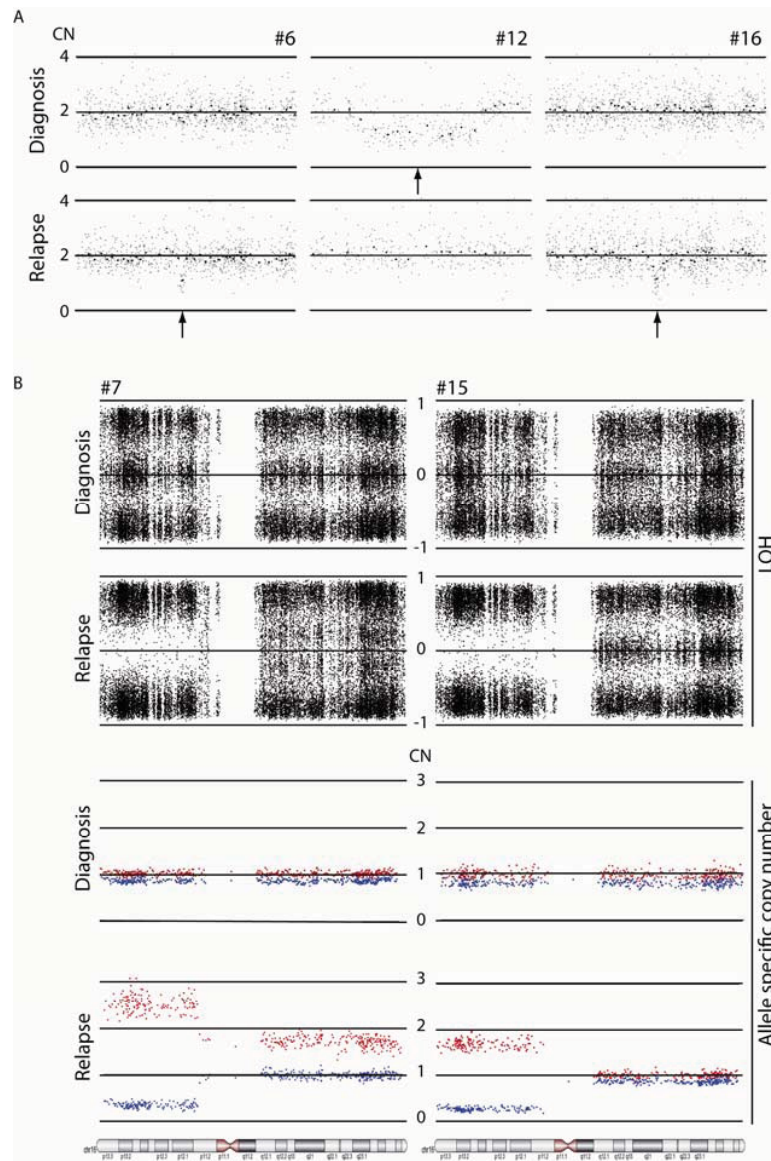

**Figure S2. Deletion and LOH/UPID analysis of chromosome 16 including *CREBBP***  
 (A) Copy numbers (CN) of genomic deletions at chromosome 16p encompassing the *CREBBP* gene indicated by arrows in cases #6, 12 and 16 are shown. The grey dots represent the raw copy number estimates at each marker. The black dots are the smoothed value of 20 copy number estimates in the defined region. (B) UPID at 16p including *CREBBP* in cases #7 and 15. The upper part of the figure shows the allelic ratios in unpaired LOH analysis of chromosome 16 in diagnosis and relapse samples. In homozygous stretches the spots migrate towards 1 (AA calls) and -1 (BB calls) at relapse. 0 corresponds to heterozygous calls (AB calls). The lower part of the graph displays allele specific copy number analysis of chromosome 16. The maximum and minimum alleles are represented in red and blue dots, respectively. AsCN shows loss of one allele and a corresponding gain of the other allele in a region on chromosome 16p leading to UPIT and UPID in patient #7 and 15, respectively.

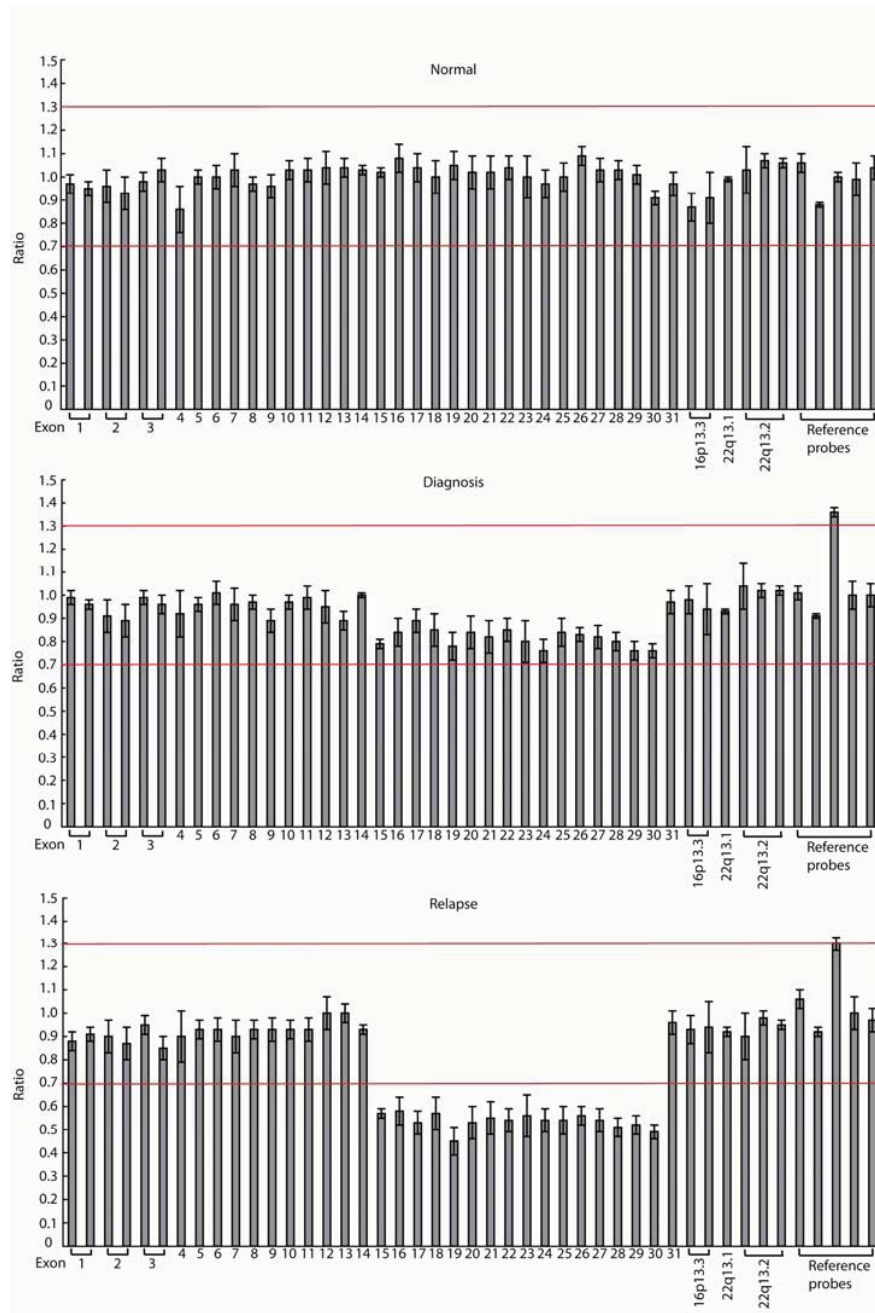

**Figure S3. MLPA confirming the heterozygous *CREBBP* deletion with SALSA MLPA kit P313-A1 *CREBBP* in case #6.** Normalized DNA copy number ratios of *CREBBP* exon 1-31 (indicated at the bottom of the respective bars). Red lines depict thresholds of 1.3 and 0.7 (range for two copies), to identify copy gains and losses. A threshold between 0.7 and 0.3 represents a DNA copy number of 1. The matched remission sample (representing the constitutional genotype without copy number changes) is shown in the top diagram. At relapse (bottom graph) a monoallelic focal deletion of *CREBBP* exons 15-30 is seen. Next to the specific *CREBBP* exon probes are probes on 16p13.3, 22q13.1 and 22q13.2 and the reference probes (corresponding to genomic location 1q44, 2q31, 8q24, 10q22 and 11q13, from left to right) that confirm a trisomy 8 in the diagnosis (middle) and relapse sample (bottom).
